# Supplementary material for: Mapping and Analysis of Swi5 and Sfr1 Phosphorylation Sites
Source: MDPI journal article supplement (doi:10.3390/genes12071014), 2021-06-30
Supplement: s1 [file s1]

**Table S3. *S. pombe* strains and genotypes**

| Strain number | Genotype                                                                                                                                                         | Used in                  |
|---------------|------------------------------------------------------------------------------------------------------------------------------------------------------------------|--------------------------|
| JG16489       | <i>pat1-114 sfr1-5A-(S26A, S33A, S109A, S155A, S165A)-TAP::KanMX6</i>                                                                                            | Figure S1, Table S1      |
| JG15195       | <i>h<sup>-</sup>/h<sup>-</sup> ade6-210/ade6-216 pat1-114/pat1-114 sfr1-TAP::KanMX/sfr1-TAP::KanMX6</i>                                                          | Figure 1, Table S2       |
| JG12618       | <i>h<sup>90</sup> ade6-216 leu1-32 lys1-131 ura4-D18 cen2(D107)::kan-ura4<sup>+</sup>-lacO his7<sup>+</sup>::lacI-GFP</i>                                        | Figure 2                 |
| JG15974       | <i>h<sup>90</sup> ade6-216 leu1-32 lys1-131 ura4-D18 cen2(D107)::kan-ura4<sup>+</sup>-lacOp his7<sup>+</sup>::lacI-GFP sfr1::NatMX4</i>                          | Figure 2                 |
| JG17984       | <i>h<sup>90</sup> ade6-216 leu1-32 lys1-131 ura4-D18 cen2(D107)::kan-ura4<sup>+</sup>-lacOp his7<sup>+</sup>::lacI-GFP sfr1::NatMX4 sfr1<sup>+</sup>::hphMX4</i> | Figure 2                 |
| JG17985       | <i>h<sup>90</sup> ade6-216 leu1-32 lys1-131 ura4-D18 cen2(D107)::kan-ura4<sup>+</sup>-lacOp his7<sup>+</sup>::lacI-GFP sfr1::NatMX4 sfr1-13A::hphMX4</i>         | Figure 2                 |
| JG17986       | <i>h<sup>90</sup> ade6-216 leu1-32 lys1-131 ura4-D18 cen2(D107)::kan-ura4<sup>+</sup>-lacOp his7<sup>+</sup>::lacI-GFP sfr1::NatMX4 sfr1-13D::hphMX4</i>         | Figure 2                 |
| JG11248       | <i>h<sup>90</sup> leu1 ura4 LacO-lys1<sup>+</sup> GFP-LacI-his7<sup>+</sup></i>                                                                                  | Figure 2                 |
| JG14998       | <i>h<sup>90</sup> leu1 ura4 LacO-lys1<sup>+</sup> GFP-LacI-his7<sup>+</sup> swi5::NatMX4</i>                                                                     | Figure 2                 |
| JG17812       | <i>h<sup>90</sup> leu1 ura4 LacO-lys1<sup>+</sup> GFP-LacI-his7<sup>+</sup> swi5::NatMX4 swi5<sup>+</sup>::hphMX4</i>                                            | Figure 2                 |
| JG17813       | <i>h<sup>90</sup> leu1 ura4 LacO-lys1<sup>+</sup> GFP-LacI-his7<sup>+</sup> swi5::NatMX4 swi5-2A::hphMX4</i>                                                     | Figure 2                 |
| JG17814       | <i>h<sup>90</sup> leu1 ura4 LacO-lys1<sup>+</sup> GFP-LacI-his7<sup>+</sup> swi5::NatMX4 swi5-2D::hphMX4</i>                                                     | Figure 2                 |
| JG17933       | <i>pat1-114 leu1 ura4 LacO-lys1<sup>+</sup> GFP-LacI-his7<sup>+</sup> swi5::NatMX4 swi5<sup>+</sup>::hphMX4 swi5-TAP::kanMX6</i>                                 | Figure 3, Figure S4      |
| JG17934       | <i>pat1-114 leu1 ura4 LacO-lys1<sup>+</sup> GFP-LacI-his7<sup>+</sup> swi5::NatMX4 swi5-2A::hphMX4 swi5-2A-TAP::kanMX6</i>                                       | Figure 3, Figure S4      |
| JG17935       | <i>pat1-114 leu1 ura4 LacO-lys1<sup>+</sup> GFP-LacI-his7<sup>+</sup> swi5::NatMX4 swi5-2D::hphMX4 swi5-2D-TAP::kanMX6</i>                                       | Figure 3, Figure S4      |
| JG17886       | <i>h<sup>+</sup>/h<sup>+</sup> ade6-M210/ade-M216 pat1-114/pat1-114 meu5::TAP-kanMX/pat1-114 meu5::TAP-kanMX6</i>                                                | Figure 3 (PC), Figure S4 |
| JG18174       | <i>h<sup>-</sup> pat1-114 ade6-210 sfr1::NatMX4 sfr1<sup>+</sup>::hphMX4 sfr1-TAP::kanMX6</i>                                                                    | Figure S2                |
| JG18177       | <i>h<sup>-</sup> pat1-114 ade6-210 sfr1::NatMX4 sfr1-13A::hphMX4 sfr1-13A-TAP::kanMX6</i>                                                                        | Figure S2                |
| JG18204       | <i>h<sup>-</sup> pat1-114 ade6-210 sfr1::NatMX4 sfr1-13D::hphMX4 sfr1-13D-TAP::kanMX6</i>                                                                        | Figure S2                |

(other auxotrophic markers not scored)
