# Supplementary material for: Mapping and Analysis of Swi5 and Sfr1 Phosphorylation Sites
Source: Genes (Basel). 2021 Jun 30;12(7):1014. doi: 10.3390/genes12071014 (PMC8305525; doi:10.3390/genes12071014)
Supplement: Supplementary file 1 [file genes-12-01014-s001.zip]

Archive with 4 entries (4 files):
- Figures_S1,S2,S3,S4.pdf
- TableS1.xlsx
- TableS2.xlsx
- TableS3.pdf
