# Supplementary material for: Mapping and Analysis of Swi5 and Sfr1 Phosphorylation Sites
Source: Genes (Basel). 2021 Jun 30;12(7):1014. doi: 10.3390/genes12071014 (PMC8305525; doi:10.3390/genes12071014)
Supplement: Supplementary file 1 [file genes-12-01014-s001.zip › TableS1.xlsx]

## Sheet: long list
Accession	Description	Score	Coverage	# Proteins	# Unique Peptides	# Peptides	# PSMs	# AAs	MW [kDa]	calc. pI
SPBC1735	Sfr1-5A mutant |S. pombe|	1054.93	88.63	2	30	31	289	299	33.5373	7.40088
	Confidence Level	Sequence	PSM Ambiguity	# Proteins	# Protein Groups	Protein Group Accessions	Modifications	Activation Type	ΔScore	ΔCn	Rank	Search Engine Rank	pRS Probability	pRS Site Probabilities	pRS Score	Peptides Matched	XCorr	Probability	# Missed Cleavages	Isolation Interference [%]	Ion Inject Time [ms]	Charge	m/z [Da]	MH+ [Da]	ΔM [ppm]	RT [min]	First Scan	Last Scan	MS Order	Ions Matched	Spectrum File
probably OK	Medium	ALtPDLR	Unambiguous	2	1	SPBC1735	T3(Phospho)	HCD	1	0	1	1	1	T(3): 100.0	222.624	37	2.10561	0	0	19.1362	163	2	433.213	865.418	-0.137571	40.5281	9576	9576	MS2	9/17	120406QEx1_Gregan_Cipak_Sfr1-5A_try_10%.raw
	Low	ALtPDLR	Unconsidered	2	1	SPBC1735	T3(Phospho)	HCD	1	0	1	1	1	T(3): 100.0	185.711	26	1.79986	0	0	3.87519	16	2	433.212	865.418	-0.419679	40.8919	9671	9671	MS2	8/17	120406QEx1_Gregan_Cipak_Sfr1-5A_try_10%.raw
	Medium	ALTPDLR	Unambiguous	2	1	SPBC1735		HCD	1	0	1	1				18	1.90974	0	0	0	46	2	393.229	785.451	-1.21095	34.2348	7947	7947	MS2	9/12	120406QEx1_Gregan_Cipak_Sfr1-5A_try_10%.raw
	Low	ALTPDLR	Unconsidered	2	1	SPBC1735		HCD	1	0	1	1				15	1.6946	0	0	14.4937	3	2	393.229	785.451	-0.200758	34.5835	8031	8031	MS2	8/12	120406QEx1_Gregan_Cipak_Sfr1-5A_try_10%.raw
	Low	ALTPDLR	Unconsidered	2	1	SPBC1735		HCD	1	0	1	1				23	1.7782	0	0	13.3389	51	2	393.229	785.452	0.0323633	34.9255	8117	8117	MS2	8/12	120406QEx1_Gregan_Cipak_Sfr1-5A_try_10%.raw
	Low	ALTPDLR	Unconsidered	2	1	SPBC1735		HCD	1	0	1	1				21	1.67058	0	0	34.4124	168	2	393.229	785.451	-0.200758	35.2909	8205	8205	MS2	9/12	120406QEx1_Gregan_Cipak_Sfr1-5A_try_10%.raw
	High	ALTPDLRDTK	Unambiguous	2	1	SPBC1735		HCD	1	0	1	1				72	2.28425	0	1	15.2252	250	2	565.314	1129.62	0.037286	30.3921	6985	6985	MS2	9/18	120406QEx1_Gregan_Cipak_Sfr1-5A_try_10%.raw
	Low	ALTPDLRDTK	Unconsidered	2	1	SPBC1735		HCD	1	0	1	1				71	2.04768	0	1	6.54264	250	3	377.212	1129.62	-0.028649	30.525	7015	7015	MS2	8/36	120406QEx1_Gregan_Cipak_Sfr1-5A_try_10%.raw
	High	APISNcLNPK	Unambiguous	1	1	SPBC1735	C6(Carbamidomethyl)	HCD	1	0	1	1				53	2.61024	0	0	0.526168	1	2	557.291	1113.57	1.56688	30.6804	7055	7055	MS2	11/18	120406QEx1_Gregan_Cipak_Sfr1-5A_try_10%.raw
	High	APISNcLNPK	Unambiguous	1	1	SPBC1735	C6(Carbamidomethyl)	HCD	1	0	1	1				52	2.60617	0	0	0.634714	3	2	557.29	1113.57	0.251438	31.0199	7140	7140	MS2	11/18	120406QEx1_Gregan_Cipak_Sfr1-5A_try_10%.raw
	High	APISNcLNPK	Unambiguous	1	1	SPBC1735	C6(Carbamidomethyl)	HCD	1	0	1	1				51	2.6687	0	0	7.03122	35	2	557.29	1113.57	0.0321968	31.3678	7229	7229	MS2	12/18	120406QEx1_Gregan_Cipak_Sfr1-5A_try_10%.raw
	High	APISNcLNPK	Unambiguous	1	1	SPBC1735	C6(Carbamidomethyl)	HCD	1	0	1	1				68	2.69535	0	0	17.5155	113	2	557.29	1113.57	1.34764	32.117	7422	7422	MS2	11/18	120406QEx1_Gregan_Cipak_Sfr1-5A_try_10%.raw
	High	APISNcLNPK	Unambiguous	1	1	SPBC1735	C6(Carbamidomethyl)	HCD	1	0	1	1				77	2.91962	0	0	56.0594	185	2	557.289	1113.57	-0.406285	32.5353	7525	7525	MS2	9/18	120406QEx1_Gregan_Cipak_Sfr1-5A_try_10%.raw
	High	APISNcLNPK	Unambiguous	1	1	SPBC1735	C6(Carbamidomethyl)	HCD	1	0	1	1				70	2.84932	0	0	46.8022	250	2	557.29	1113.57	0.361058	33.2505	7701	7701	MS2	11/18	120406QEx1_Gregan_Cipak_Sfr1-5A_try_10%.raw
	Low	APISNcLNPK	Unconsidered	1	1	SPBC1735	C6(Carbamidomethyl)	HCD	1	0	1	1				69	1.74273	0	0	18.6114	250	2	557.29	1113.57	-0.0774237	35.9865	8384	8384	MS2	8/18	120406QEx1_Gregan_Cipak_Sfr1-5A_try_10%.raw
spectrum OK - S4/S8	High	cNNsGNHSDNLGFIEQSETVHPENEK	Unambiguous	2	1	SPBC1735	C1(Carbamidomethyl); S4(Phospho)	HCD	1	0	1	1	0.0121485	S(4): 1.2; S(8): 98.8; S(17): 0.0; T(19): 0.0	338.511	889	3.61082	0	0	2.24228	250	3	1012.75	3036.24	0.520219	41.3831	9798	9798	MS2	23/148	120406QEx1_Gregan_Cipak_Sfr1-5A_try_10%.raw
	High	cNNSGNHSDNLGFIEQSETVHPENEK	Unambiguous	2	1	SPBC1735	C1(Carbamidomethyl)	HCD	1	0	1	1				622	7.34075	0	0	6.08635	70	3	986.097	2956.28	-0.0362164	37.4569	8766	8766	MS2	27/100	120406QEx1_Gregan_Cipak_Sfr1-5A_try_10%.raw
	High	cNNSGNHSDNLGFIEQSETVHPENEK	Unambiguous	2	1	SPBC1735	C1(Carbamidomethyl)	HCD	1	0	1	1				914	6.72481	0	0	2.40282	78	4	739.824	2956.27	-0.515622	37.4587	8767	8767	MS2	24/150	120406QEx1_Gregan_Cipak_Sfr1-5A_try_10%.raw
	High	cNNSGNHSDNLGFIEQSETVHPENEK	Unambiguous	2	1	SPBC1735	C1(Carbamidomethyl)	HCD	1	0	1	1				395	5.73648	0	0	5.96944	250	2	1478.64	2956.28	-0.0523139	37.5557	8792	8792	MS2	24/50	120406QEx1_Gregan_Cipak_Sfr1-5A_try_10%.raw
	High	cNNSGNHSDNLGFIEQSETVHPENEK	Unambiguous	2	1	SPBC1735	C1(Carbamidomethyl)	HCD	1	0	1	1				646	6.37339	0	0	0.498895	44	3	986.096	2956.27	-0.469782	37.815	8863	8863	MS2	26/100	120406QEx1_Gregan_Cipak_Sfr1-5A_try_10%.raw
	High	cNNSGNHSDNLGFIEQSETVHPENEK	Unambiguous	2	1	SPBC1735	C1(Carbamidomethyl)	HCD	1	0	1	1				846	5.85488	0	0	0	79	4	739.824	2956.27	-0.763374	37.8267	8867	8867	MS2	25/150	120406QEx1_Gregan_Cipak_Sfr1-5A_try_10%.raw
	High	cNNSGNHSDNLGFIEQSETVHPENEK	Unambiguous	2	1	SPBC1735	C1(Carbamidomethyl)	HCD	1	0	1	1				641	6.20511	0	0	34.3061	250	3	986.097	2956.28	0.4275	38.179	8961	8961	MS2	22/100	120406QEx1_Gregan_Cipak_Sfr1-5A_try_10%.raw
	High	cNNSGNHSDNLGFIEQSETVHPENEK	Unambiguous	2	1	SPBC1735	C1(Carbamidomethyl)	HCD	1	0	1	1				818	3.57709	0	0	3.07527	250	4	739.824	2956.27	-1.17629	38.1943	8966	8966	MS2	20/150	120406QEx1_Gregan_Cipak_Sfr1-5A_try_10%.raw
	High	DAQGQLGIENPPK	Unambiguous	1	1	SPBC1735		HCD	1	0	1	1				62	3.68371	0	0	41.4116	109	2	683.852	1366.7	-0.161594	36.519	8521	8521	MS2	14/24	120406QEx1_Gregan_Cipak_Sfr1-5A_try_10%.raw
	High	DAQGQLGIENPPK	Unambiguous	1	1	SPBC1735		HCD	1	0	1	1				74	3.22067	0	0	45.9845	77	3	456.237	1366.7	-0.350068	36.8168	8596	8596	MS2	14/48	120406QEx1_Gregan_Cipak_Sfr1-5A_try_10%.raw
	High	DAQGQLGIENPPK	Unambiguous	1	1	SPBC1735		HCD	1	0	1	1				69	4.2537	0	0	0.304253	2	2	683.852	1366.7	0.463631	36.8845	8614	8614	MS2	15/24	120406QEx1_Gregan_Cipak_Sfr1-5A_try_10%.raw
	High	DAQGQLGIENPPK	Unambiguous	1	1	SPBC1735		HCD	1	0	1	1				63	3.28685	0	0	30.1661	20	3	456.236	1366.69	-2.69467	37.1687	8690	8690	MS2	12/48	120406QEx1_Gregan_Cipak_Sfr1-5A_try_10%.raw
	High	DAQGQLGIENPPK	Unambiguous	1	1	SPBC1735		HCD	1	0	1	1				67	3.91887	0	0	0	2	2	683.851	1366.7	-0.518865	37.2273	8707	8707	MS2	14/24	120406QEx1_Gregan_Cipak_Sfr1-5A_try_10%.raw
	High	DAQGQLGIENPPK	Unambiguous	1	1	SPBC1735		HCD	1	0	1	1				69	3.77502	0	0	6.55519	46	2	683.851	1366.7	-0.429547	37.5716	8796	8796	MS2	15/24	120406QEx1_Gregan_Cipak_Sfr1-5A_try_10%.raw
	High	DAQGQLGIENPPK	Unambiguous	1	1	SPBC1735		HCD	1	0	1	1				69	3.58832	0	0	14.1946	134	2	683.852	1366.7	-0.161594	37.925	8895	8895	MS2	14/24	120406QEx1_Gregan_Cipak_Sfr1-5A_try_10%.raw
	High	DAQGQLGIENPPK	Unambiguous	1	1	SPBC1735		HCD	1	0	1	1				77	3.24145	0	0	41.6965	212	2	683.852	1366.7	0.642266	39.7796	9379	9379	MS2	13/24	120406QEx1_Gregan_Cipak_Sfr1-5A_try_10%.raw
	High	DLQTLIQK	Unambiguous	2	1	SPBC1735		HCD	1	0	1	1				29	2.25068	0	0	45.5716	250	2	479.782	958.557	-0.31942	44.5054	10616	10616	MS2	8/14	120406QEx1_Gregan_Cipak_Sfr1-5A_try_10%.raw
	Medium	DLQTLIQK	Unambiguous	2	1	SPBC1735		HCD	1	0	1	1				26	2.06376	0	0	1.50958	7	2	479.782	958.557	0.189973	44.8456	10700	10700	MS2	8/14	120406QEx1_Gregan_Cipak_Sfr1-5A_try_10%.raw
	Medium	DLQTLIQK	Unambiguous	2	1	SPBC1735		HCD	1	0	1	1				26	1.85629	0	0	38.3471	100	2	479.782	958.557	-0.31942	50.2399	12077	12077	MS2	8/14	120406QEx1_Gregan_Cipak_Sfr1-5A_try_10%.raw
	High	EDLKVSLAESDLR	Unambiguous	1	1	SPBC1735		HCD	1	0	1	1				56	3.83075	0	1	0	180	2	737.893	1474.78	2.97068	42.1386	10007	10007	MS2	16/24	120406QEx1_Gregan_Cipak_Sfr1-5A_try_10%.raw
	High	EDLKVSLAESDLR	Unambiguous	1	1	SPBC1735		HCD	1	0	1	1				60	3.21075	0	1	18.5628	22	3	492.263	1474.78	0.168015	42.1638	10014	10014	MS2	15/48	120406QEx1_Gregan_Cipak_Sfr1-5A_try_10%.raw
	High	EDLKVSLAESDLR	Unambiguous	1	1	SPBC1735		HCD	1	0	1	1				83	3.00063	0	1	55.7591	208	3	492.263	1474.78	0.540489	42.5325	10110	10110	MS2	10/48	120406QEx1_Gregan_Cipak_Sfr1-5A_try_10%.raw
	Medium	GQIQEVR	Unambiguous	2	1	SPBC1735		HCD	1	0	1	1				26	1.90512	0	0	1.02301	1	2	415.23	829.454	1.03382	22.6786	5157	5157	MS2	7/12	120406QEx1_Gregan_Cipak_Sfr1-5A_try_10%.raw
	Medium	GQIQEVR	Unambiguous	2	1	SPBC1735		HCD	1	0	1	1				27	1.89485	0	0	1.52928	4	2	415.23	829.453	0.297977	23.0415	5241	5241	MS2	7/12	120406QEx1_Gregan_Cipak_Sfr1-5A_try_10%.raw
	Medium	GQIQEVR	Unambiguous	2	1	SPBC1735		HCD	1	0	1	1				25	1.87692	0	0	3.31388	20	2	415.23	829.453	-0.143532	23.3816	5317	5317	MS2	7/12	120406QEx1_Gregan_Cipak_Sfr1-5A_try_10%.raw
	Medium	GQIQEVR	Unambiguous	2	1	SPBC1735		HCD	1	0	1	1				38	1.90295	0	0	22.3872	56	2	415.23	829.452	-0.364286	23.7659	5402	5402	MS2	7/12	120406QEx1_Gregan_Cipak_Sfr1-5A_try_10%.raw
	Low	GQIQEVR	Unconsidered	2	1	SPBC1735		HCD	1	0	1	1				38	1.81001	0	0	15.7023	87	2	415.23	829.452	-0.364286	24.1277	5488	5488	MS2	7/12	120406QEx1_Gregan_Cipak_Sfr1-5A_try_10%.raw
	Medium	GQIQEVR	Unambiguous	2	1	SPBC1735		HCD	1	0	1	1				39	1.91523	0	0	57.1472	109	2	415.23	829.453	-0.0699469	24.7423	5632	5632	MS2	6/12	120406QEx1_Gregan_Cipak_Sfr1-5A_try_10%.raw
	Medium	GQIQEVR	Unambiguous	2	1	SPBC1735		HCD	1	0	1	1				39	1.98855	0	0	26.6893	213	2	415.23	829.453	0.0772228	25.1995	5746	5746	MS2	7/12	120406QEx1_Gregan_Cipak_Sfr1-5A_try_10%.raw
	Medium	GQIQEVR	Unambiguous	2	1	SPBC1735		HCD	1	0	1	1				38	1.96707	0	0	63.0133	250	2	415.23	829.452	-0.511456	26.3999	6034	6034	MS2	6/12	120406QEx1_Gregan_Cipak_Sfr1-5A_try_10%.raw
	Low	GQIQEVR	Unconsidered	2	1	SPBC1735		HCD	1	0	1	1				39	1.71542	0	0	14.4022	250	2	415.23	829.453	0.150808	27.9634	6389	6389	MS2	6/12	120406QEx1_Gregan_Cipak_Sfr1-5A_try_10%.raw
	Low	GQIQEVR	Unconsidered	2	1	SPBC1735		HCD	1	0	1	1				38	1.71299	0	0	53.1808	250	2	415.23	829.452	-0.364286	28.8227	6604	6604	MS2	6/12	120406QEx1_Gregan_Cipak_Sfr1-5A_try_10%.raw
	High	IEEGENKGQIQEVR	Unambiguous	2	1	SPBC1735		HCD	1	0	1	1				83	4.78138	0	1	8.74815	107	3	543.613	1628.82	0.166112	25.5787	5836	5836	MS2	16/52	120406QEx1_Gregan_Cipak_Sfr1-5A_try_10%.raw
	High	IEEGENKGQIQEVR	Unambiguous	2	1	SPBC1735		HCD	1	0	1	1				77	5.29702	0	1	2.00894	234	2	814.915	1628.82	-0.762431	25.5896	5840	5840	MS2	19/26	120406QEx1_Gregan_Cipak_Sfr1-5A_try_10%.raw
	High	IEEGENKGQIQEVR	Unambiguous	2	1	SPBC1735		HCD	1	0	1	1				95	3.24471	0	1	7.77838	250	4	407.961	1628.82	-0.329278	25.6919	5866	5866	MS2	14/78	120406QEx1_Gregan_Cipak_Sfr1-5A_try_10%.raw
	High	IEEGENKGQIQEVR	Unambiguous	2	1	SPBC1735		HCD	1	0	1	1				98	4.9348	0	1	2.34299	9	3	543.613	1628.83	0.953021	25.9404	5925	5925	MS2	17/52	120406QEx1_Gregan_Cipak_Sfr1-5A_try_10%.raw
	High	IEEGENKGQIQEVR	Unambiguous	2	1	SPBC1735		HCD	1	0	1	1				77	4.67155	0	1	0.159269	17	2	814.915	1628.82	-0.612543	25.9416	5926	5926	MS2	19/26	120406QEx1_Gregan_Cipak_Sfr1-5A_try_10%.raw
	High	IEEGENKGQIQEVR	Unambiguous	2	1	SPBC1735		HCD	1	0	1	1				100	4.67479	0	1	5.1989	81	3	543.613	1628.82	0.390943	26.2964	6008	6008	MS2	17/52	120406QEx1_Gregan_Cipak_Sfr1-5A_try_10%.raw
	High	IEEGENKGQIQEVR	Unambiguous	2	1	SPBC1735		HCD	1	0	1	1				77	4.79623	0	1	1.02865	127	2	814.915	1628.82	-0.462656	26.2991	6009	6009	MS2	18/26	120406QEx1_Gregan_Cipak_Sfr1-5A_try_10%.raw
	High	IEEGENKGQIQEVR	Unambiguous	2	1	SPBC1735		HCD	1	0	1	1				94	4.68671	0	1	16.2479	250	3	543.613	1628.82	-0.171135	26.6414	6091	6091	MS2	17/52	120406QEx1_Gregan_Cipak_Sfr1-5A_try_10%.raw
	High	IEEGENKGQIQEVR	Unambiguous	2	1	SPBC1735		HCD	1	0	1	1				69	4.4464	0	1	5.74671	250	2	814.915	1628.82	-0.687487	26.6935	6103	6103	MS2	17/26	120406QEx1_Gregan_Cipak_Sfr1-5A_try_10%.raw
	High	IEEGENKGQIQEVR	Unambiguous	2	1	SPBC1735		HCD	1	0	1	1				86	4.04028	0	1	32.2976	213	3	543.613	1628.82	0.0536962	27.4079	6266	6266	MS2	16/52	120406QEx1_Gregan_Cipak_Sfr1-5A_try_10%.raw
	High	IEEGENKGQIQEVR	Unambiguous	2	1	SPBC1735		HCD	1	0	1	1				81	3.96492	0	1	10.8047	250	2	814.915	1628.82	-0.612543	27.4409	6273	6273	MS2	15/26	120406QEx1_Gregan_Cipak_Sfr1-5A_try_10%.raw
	High	IEEGENKGQIQEVR	Unambiguous	2	1	SPBC1735		HCD	1	0	1	1				95	3.53945	0	1	29.4458	250	3	543.613	1628.82	-0.171135	27.7625	6346	6346	MS2	16/52	120406QEx1_Gregan_Cipak_Sfr1-5A_try_10%.raw
	High	IEEGENKGQIQEVR	Unambiguous	2	1	SPBC1735		HCD	1	0	1	1				76	3.88092	0	1	42.0569	250	2	814.915	1628.82	-1.06221	27.8063	6356	6356	MS2	13/26	120406QEx1_Gregan_Cipak_Sfr1-5A_try_10%.raw
	High	IEEGENKGQIQEVR	Unambiguous	2	1	SPBC1735		HCD	1	0	1	1				94	4.06676	0	1	53.6855	250	3	543.613	1628.82	0.166112	28.487	6519	6519	MS2	14/52	120406QEx1_Gregan_Cipak_Sfr1-5A_try_10%.raw
	High	IEEGENKGQIQEVR	Unambiguous	2	1	SPBC1735		HCD	1	0	1	1				98	3.28734	0	1	30.8243	250	2	814.916	1628.82	0.361727	28.6179	6550	6550	MS2	14/26	120406QEx1_Gregan_Cipak_Sfr1-5A_try_10%.raw
	High	IEEGENKGQIQEVR	Unambiguous	2	1	SPBC1735		HCD	1	0	1	1				99	3.12808	0	1	24.8906	250	3	543.613	1628.82	-0.395967	28.9863	6643	6643	MS2	15/52	120406QEx1_Gregan_Cipak_Sfr1-5A_try_10%.raw
	High	IEEGENKGQIQEVR	Unambiguous	2	1	SPBC1735		HCD	1	0	1	1				78	2.68834	0	1	25.2485	250	2	814.915	1628.82	-0.612543	29.3971	6742	6742	MS2	10/26	120406QEx1_Gregan_Cipak_Sfr1-5A_try_10%.raw
	High	IHTSLPITTPFSK	Unambiguous	2	1	SPBC1735		HCD	1	0	1	1				32	4.22002	0	0	27.0423	246	2	721.406	1441.8	-0.60102	45.3773	10836	10836	MS2	14/24	120406QEx1_Gregan_Cipak_Sfr1-5A_try_10%.raw
	High	IHTSLPITTPFSK	Unambiguous	2	1	SPBC1735		HCD	1	0	1	1				24	3.5113	0	0	0.237469	1	3	481.274	1441.81	1.7391	45.6647	10909	10909	MS2	13/48	120406QEx1_Gregan_Cipak_Sfr1-5A_try_10%.raw
	High	IHTSLPITTPFSK	Unambiguous	2	1	SPBC1735		HCD	1	0	1	1				31	4.01077	0	0	0.0867139	2	2	721.406	1441.8	-0.0930299	45.7241	10924	10924	MS2	14/24	120406QEx1_Gregan_Cipak_Sfr1-5A_try_10%.raw
	High	IHTSLPITTPFSK	Unambiguous	2	1	SPBC1735		HCD	1	0	1	1				32	3.51936	0	0	4.70051	17	3	481.273	1441.8	-0.102356	46.0081	10996	10996	MS2	15/48	120406QEx1_Gregan_Cipak_Sfr1-5A_try_10%.raw
	High	IHTSLPITTPFSK	Unambiguous	2	1	SPBC1735		HCD	1	0	1	1				30	3.91816	0	0	2.49291	45	2	721.406	1441.8	-0.177695	46.0795	11019	11019	MS2	14/24	120406QEx1_Gregan_Cipak_Sfr1-5A_try_10%.raw
	High	IHTSLPITTPFSK	Unambiguous	2	1	SPBC1735		HCD	1	0	1	1				24	3.19431	0	0	12.7266	63	3	481.273	1441.81	0.659628	46.3838	11099	11099	MS2	13/48	120406QEx1_Gregan_Cipak_Sfr1-5A_try_10%.raw
	High	IHTSLPITTPFSK	Unambiguous	2	1	SPBC1735		HCD	1	0	1	1				29	3.08824	0	0	26.2578	122	3	481.272	1441.8	-1.94382	46.7304	11193	11193	MS2	14/48	120406QEx1_Gregan_Cipak_Sfr1-5A_try_10%.raw
	Medium	IHTSLPITTPFSK	Unambiguous	2	1	SPBC1735		HCD	1	0	1	1				30	2.68398	0	0	70.1857	156	3	481.273	1441.81	0.532631	47.3977	11361	11361	MS2	11/48	120406QEx1_Gregan_Cipak_Sfr1-5A_try_10%.raw
	High	IHTSLPITTPFSK	Unambiguous	2	1	SPBC1735		HCD	1	0	1	1				30	3.0757	0	0	25.2334	250	3	481.273	1441.8	-0.0388573	47.8261	11472	11472	MS2	10/48	120406QEx1_Gregan_Cipak_Sfr1-5A_try_10%.raw
	Medium	IHTSLPITTPFSK	Unambiguous	2	1	SPBC1735		HCD	1	0	1	1				28	2.45661	0	0	40.58	250	3	481.273	1441.81	0.469132	48.4293	11631	11631	MS2	11/48	120406QEx1_Gregan_Cipak_Sfr1-5A_try_10%.raw
	High	IHTSLPITTPFSK	Unambiguous	2	1	SPBC1735		HCD	1	0	1	1				34	3.07567	0	0	12.5873	250	2	721.406	1441.8	-0.43169	48.9259	11749	11749	MS2	13/24	120406QEx1_Gregan_Cipak_Sfr1-5A_try_10%.raw
	High	IHTSLPITTPFSKK	Unambiguous	2	1	SPBC1735		HCD	1	0	1	1				28	4.4234	0	1	47.1526	250	3	523.972	1569.9	0.567376	39.3363	9261	9261	MS2	17/52	120406QEx1_Gregan_Cipak_Sfr1-5A_try_10%.raw
spectrum OK	High	LAGGVTQsFR	Unambiguous	2	1	SPBC1735	S8(Phospho)	HCD	1	0	1	1	0.999999	T(6): 0.0; S(8): 100.0	224.686	81	2.81481	0	0	28.4347	250	2	558.268	1115.53	4.07702	38.865	9133	9133	MS2	13/26	120406QEx1_Gregan_Cipak_Sfr1-5A_try_10%.raw
	High	LAGGVTQSFR	Unambiguous	2	1	SPBC1735		HCD	1	0	1	1				50	2.40506	0	0	49.5588	117	2	518.283	1035.56	-0.183768	25.3261	5777	5777	MS2	12/18	120406QEx1_Gregan_Cipak_Sfr1-5A_try_10%.raw
	High	LAGGVTQSFR	Unambiguous	2	1	SPBC1735		HCD	1	0	1	1				38	3.08062	0	0	7.18704	18	2	518.283	1035.56	0.523504	34.0322	7897	7897	MS2	12/18	120406QEx1_Gregan_Cipak_Sfr1-5A_try_10%.raw
	High	LAGGVTQSFR	Unambiguous	2	1	SPBC1735		HCD	1	0	1	1				42	3.02689	0	0	0.694067	0	2	518.283	1035.56	-0.301647	34.3911	7985	7985	MS2	12/18	120406QEx1_Gregan_Cipak_Sfr1-5A_try_10%.raw
	High	LAGGVTQSFR	Unambiguous	2	1	SPBC1735		HCD	1	0	1	1				45	3.18494	0	0	23.9529	5	2	518.283	1035.56	0.759261	34.7438	8073	8073	MS2	12/18	120406QEx1_Gregan_Cipak_Sfr1-5A_try_10%.raw
	High	LAGGVTQSFR	Unambiguous	2	1	SPBC1735		HCD	1	0	1	1				40	2.97272	0	0	8.34927	20	2	518.283	1035.56	0.405625	35.1049	8158	8158	MS2	12/18	120406QEx1_Gregan_Cipak_Sfr1-5A_try_10%.raw
	High	LAGGVTQSFR	Unambiguous	2	1	SPBC1735		HCD	1	0	1	1				38	2.73802	0	0	10.8931	32	2	518.283	1035.56	0.759261	35.4866	8256	8256	MS2	12/18	120406QEx1_Gregan_Cipak_Sfr1-5A_try_10%.raw
	High	LAGGVTQSFR	Unambiguous	2	1	SPBC1735		HCD	1	0	1	1				42	2.68535	0	0	20.7486	39	2	518.283	1035.56	0.523504	35.8677	8353	8353	MS2	12/18	120406QEx1_Gregan_Cipak_Sfr1-5A_try_10%.raw
	High	LAGGVTQSFR	Unambiguous	2	1	SPBC1735		HCD	1	0	1	1				54	2.51182	0	0	42.4762	74	2	518.283	1035.56	1.1129	37.3282	8732	8732	MS2	11/18	120406QEx1_Gregan_Cipak_Sfr1-5A_try_10%.raw
	High	LAGGVTQSFRIEEGENKGQIQEVR	Unambiguous	2	1	SPBC1735		HCD	1	0	1	1				107	6.82288	0	2	0	250	3	882.46	2645.36	0.0426161	39.1304	9206	9206	MS2	30/92	120406QEx1_Gregan_Cipak_Sfr1-5A_try_10%.raw
	High	LAGGVTQSFRIEEGENKGQIQEVR	Unambiguous	2	1	SPBC1735		HCD	1	0	1	1				127	6.75473	0	2	1.61889	250	4	662.097	2645.36	0.222113	39.1604	9216	9216	MS2	26/138	120406QEx1_Gregan_Cipak_Sfr1-5A_try_10%.raw
	High	LFKAPISNcLNPK	Unambiguous	1	1	SPBC1735	C9(Carbamidomethyl)	HCD	1	0	1	1				64	4.23598	0	1	22.0472	250	3	501.278	1501.82	-0.508722	38.9232	9151	9151	MS2	17/48	120406QEx1_Gregan_Cipak_Sfr1-5A_try_10%.raw
	High	LFKAPISNcLNPK	Unambiguous	1	1	SPBC1735	C9(Carbamidomethyl)	HCD	1	0	1	1				50	3.44967	0	1	10.4648	250	2	751.413	1501.82	-1.1297	38.964	9162	9162	MS2	14/24	120406QEx1_Gregan_Cipak_Sfr1-5A_try_10%.raw
	Medium	LKLEKEVR	Unambiguous	2	1	SPBC1735		HCD	1	0	1	1				13	1.88556	0	2	37.8715	148	2	507.819	1014.63	0.603061	22.5495	5128	5128	MS2	9/14	120406QEx1_Gregan_Cipak_Sfr1-5A_try_10%.raw
	High	NAAQQAAEVLFKPmAER	Unambiguous	2	1	SPBC1735	M14(Oxidation)	HCD	1	0	1	1				104	4.96832	0	0	7.42237	196	3	630.656	1889.95	-0.723563	45.8954	10966	10966	MS2	21/64	120406QEx1_Gregan_Cipak_Sfr1-5A_try_10%.raw
	High	NAAQQAAEVLFKPmAER	Unambiguous	2	1	SPBC1735	M14(Oxidation)	HCD	1	0	1	1				89	4.94787	0	0	0	250	2	945.48	1889.95	-0.651859	45.9393	10977	10977	MS2	19/32	120406QEx1_Gregan_Cipak_Sfr1-5A_try_10%.raw
	High	NAAQQAAEVLFKPmAER	Unambiguous	2	1	SPBC1735	M14(Oxidation)	HCD	1	0	1	1				93	4.43184	0	0	0.165821	1	3	630.657	1889.96	1.02034	46.238	11063	11063	MS2	19/64	120406QEx1_Gregan_Cipak_Sfr1-5A_try_10%.raw
	High	NAAQQAAEVLFKPmAER	Unambiguous	2	1	SPBC1735	M14(Oxidation)	HCD	1	0	1	1				111	3.49975	0	0	30.1953	31	4	473.243	1889.95	-1.95787	46.2392	11064	11064	MS2	21/96	120406QEx1_Gregan_Cipak_Sfr1-5A_try_10%.raw
	High	NAAQQAAEVLFKPmAER	Unambiguous	2	1	SPBC1735	M14(Oxidation)	HCD	1	0	1	1				88	3.67899	0	0	0	7	2	945.48	1889.95	-0.458092	46.2794	11073	11073	MS2	18/32	120406QEx1_Gregan_Cipak_Sfr1-5A_try_10%.raw
	High	NAAQQAAEVLFKPmAER	Unambiguous	2	1	SPBC1735	M14(Oxidation)	HCD	1	0	1	1				101	4.59562	0	0	15.8179	25	3	630.658	1889.96	2.18294	46.5848	11158	11158	MS2	21/64	120406QEx1_Gregan_Cipak_Sfr1-5A_try_10%.raw
	High	NAAQQAAEVLFKPmAER	Unambiguous	2	1	SPBC1735	M14(Oxidation)	HCD	1	0	1	1				76	4.16966	0	0	0	250	2	945.477	1889.95	-3.4292	46.7279	11192	11192	MS2	18/32	120406QEx1_Gregan_Cipak_Sfr1-5A_try_10%.raw
	High	NAAQQAAEVLFKPmAER	Unambiguous	2	1	SPBC1735	M14(Oxidation)	HCD	1	0	1	1				104	4.72081	0	0	0.634233	34	3	630.656	1889.95	0.245273	46.9312	11245	11245	MS2	22/64	120406QEx1_Gregan_Cipak_Sfr1-5A_try_10%.raw
	High	NAAQQAAEVLFKPmAER	Unambiguous	2	1	SPBC1735	M14(Oxidation)	HCD	1	0	1	1				102	4.32859	0	0	24.609	250	2	945.48	1889.95	-0.264324	47.0881	11280	11280	MS2	17/32	120406QEx1_Gregan_Cipak_Sfr1-5A_try_10%.raw
	High	NAAQQAAEVLFKPmAER	Unambiguous	2	1	SPBC1735	M14(Oxidation)	HCD	1	0	1	1				103	4.57343	0	0	7.30997	29	3	630.656	1889.95	0.245273	47.2919	11334	11334	MS2	22/64	120406QEx1_Gregan_Cipak_Sfr1-5A_try_10%.raw
	High	NAAQQAAEVLFKPmAER	Unambiguous	2	1	SPBC1735	M14(Oxidation)	HCD	1	0	1	1				83	4.50412	0	0	9.62107	250	2	945.48	1889.95	-0.135146	47.477	11381	11381	MS2	19/32	120406QEx1_Gregan_Cipak_Sfr1-5A_try_10%.raw
	High	NAAQQAAEVLFKPmAER	Unambiguous	2	1	SPBC1735	M14(Oxidation)	HCD	1	0	1	1				111	4.79143	0	0	14.3104	25	3	630.656	1889.95	-0.336028	47.6452	11422	11422	MS2	20/64	120406QEx1_Gregan_Cipak_Sfr1-5A_try_10%.raw
	High	NAAQQAAEVLFKPmAER	Unambiguous	2	1	SPBC1735	M14(Oxidation)	HCD	1	0	1	1				85	4.72156	0	0	0	250	2	945.48	1889.95	-0.135146	47.8536	11479	11479	MS2	19/32	120406QEx1_Gregan_Cipak_Sfr1-5A_try_10%.raw
	High	NAAQQAAEVLFKPmAER	Unambiguous	2	1	SPBC1735	M14(Oxidation)	HCD	1	0	1	1				103	4.65719	0	0	0	36	3	630.656	1889.95	-0.432912	48.0008	11521	11521	MS2	23/64	120406QEx1_Gregan_Cipak_Sfr1-5A_try_10%.raw
	High	NAAQQAAEVLFKPmAER	Unambiguous	2	1	SPBC1735	M14(Oxidation)	HCD	1	0	1	1				83	4.52654	0	0	0	209	2	945.48	1889.95	-0.716448	48.2516	11586	11586	MS2	18/32	120406QEx1_Gregan_Cipak_Sfr1-5A_try_10%.raw
	High	NAAQQAAEVLFKPmAER	Unambiguous	2	1	SPBC1735	M14(Oxidation)	HCD	1	0	1	1				107	4.5329	0	0	19.4113	21	3	630.656	1889.95	-0.239144	48.444	11636	11636	MS2	20/64	120406QEx1_Gregan_Cipak_Sfr1-5A_try_10%.raw
	High	NAAQQAAEVLFKPmAER	Unambiguous	2	1	SPBC1735	M14(Oxidation)	HCD	1	0	1	1				86	4.04565	0	0	1.10309	250	2	945.479	1889.95	-1.29775	48.618	11675	11675	MS2	15/32	120406QEx1_Gregan_Cipak_Sfr1-5A_try_10%.raw
	High	NAAQQAAEVLFKPmAER	Unambiguous	2	1	SPBC1735	M14(Oxidation)	HCD	1	0	1	1				103	4.36983	0	0	3.124	39	3	630.656	1889.95	-0.0453773	48.8034	11719	11719	MS2	21/64	120406QEx1_Gregan_Cipak_Sfr1-5A_try_10%.raw
	High	NAAQQAAEVLFKPmAER	Unambiguous	2	1	SPBC1735	M14(Oxidation)	HCD	1	0	1	1				105	4.43845	0	0	10.3355	54	3	630.656	1889.95	-0.626679	49.1799	11813	11813	MS2	21/64	120406QEx1_Gregan_Cipak_Sfr1-5A_try_10%.raw
	High	NAAQQAAEVLFKPmAER	Unambiguous	2	1	SPBC1735	M14(Oxidation)	HCD	1	0	1	1				102	4.7724	0	0	0	90	3	630.656	1889.95	0.535924	49.5351	11897	11897	MS2	21/64	120406QEx1_Gregan_Cipak_Sfr1-5A_try_10%.raw
	High	NAAQQAAEVLFKPmAER	Unambiguous	2	1	SPBC1735	M14(Oxidation)	HCD	1	0	1	1				79	3.79729	0	0	0	250	2	945.482	1889.96	0.962867	49.6144	11916	11916	MS2	17/32	120406QEx1_Gregan_Cipak_Sfr1-5A_try_10%.raw
	High	NAAQQAAEVLFKPmAER	Unambiguous	2	1	SPBC1735	M14(Oxidation)	HCD	1	0	1	1				102	4.68397	0	0	0	141	3	630.658	1889.96	2.76424	49.9786	12007	12007	MS2	20/64	120406QEx1_Gregan_Cipak_Sfr1-5A_try_10%.raw
	High	NAAQQAAEVLFKPmAER	Unambiguous	2	1	SPBC1735	M14(Oxidation)	HCD	1	0	1	1				86	3.83151	0	0	0	250	2	945.478	1889.95	-2.65413	50.0462	12023	12023	MS2	16/32	120406QEx1_Gregan_Cipak_Sfr1-5A_try_10%.raw
	High	NAAQQAAEVLFKPmAER	Unambiguous	2	1	SPBC1735	M14(Oxidation)	HCD	1	0	1	1				105	4.4921	0	0	5.22314	75	3	630.656	1889.95	-0.336028	50.3587	12108	12108	MS2	21/64	120406QEx1_Gregan_Cipak_Sfr1-5A_try_10%.raw
	High	NAAQQAAEVLFKPmAER	Unambiguous	2	1	SPBC1735	M14(Oxidation)	HCD	1	0	1	1				82	3.71603	0	0	0	250	2	945.48	1889.95	-0.135146	50.4091	12120	12120	MS2	16/32	120406QEx1_Gregan_Cipak_Sfr1-5A_try_10%.raw
	High	NAAQQAAEVLFKPmAER	Unambiguous	2	1	SPBC1735	M14(Oxidation)	HCD	1	0	1	1				102	4.61066	0	0	8.93793	64	3	630.656	1889.95	-0.239144	50.7194	12207	12207	MS2	22/64	120406QEx1_Gregan_Cipak_Sfr1-5A_try_10%.raw
	High	NAAQQAAEVLFKPmAER	Unambiguous	2	1	SPBC1735	M14(Oxidation)	HCD	1	0	1	1				120	3.79516	0	0	26.6548	250	2	945.477	1889.95	-3.55838	50.8024	12227	12227	MS2	15/32	120406QEx1_Gregan_Cipak_Sfr1-5A_try_10%.raw
	High	NAAQQAAEVLFKPMAER	Unambiguous	2	1	SPBC1735		HCD	1	0	1	1				99	5.31228	0	0	38.9274	250	3	625.324	1873.96	-0.283939	49.5631	11904	11904	MS2	20/64	120406QEx1_Gregan_Cipak_Sfr1-5A_try_10%.raw
	High	NAAQQAAEVLFKPMAER	Unambiguous	2	1	SPBC1735		HCD	1	0	1	1				95	5.77161	0	0	16.3245	179	3	625.324	1873.96	-1.26105	51.5665	12433	12433	MS2	23/64	120406QEx1_Gregan_Cipak_Sfr1-5A_try_10%.raw
	High	NAAQQAAEVLFKPMAER	Unambiguous	2	1	SPBC1735		HCD	1	0	1	1				90	5.62009	0	0	18.0052	250	2	937.483	1873.96	-0.569895	51.6095	12446	12446	MS2	20/32	120406QEx1_Gregan_Cipak_Sfr1-5A_try_10%.raw
	High	NAAQQAAEVLFKPMAER	Unambiguous	2	1	SPBC1735		HCD	1	0	1	1				104	3.27844	0	0	38.7503	13	4	469.245	1873.96	-0.519105	51.7881	12491	12491	MS2	24/96	120406QEx1_Gregan_Cipak_Sfr1-5A_try_10%.raw
	High	NAAQQAAEVLFKPMAER	Unambiguous	2	1	SPBC1735		HCD	1	0	1	1				77	4.96449	0	0	0.18263	0	3	625.326	1873.96	1.9634	51.9007	12519	12519	MS2	21/64	120406QEx1_Gregan_Cipak_Sfr1-5A_try_10%.raw
	High	NAAQQAAEVLFKPMAER	Unambiguous	2	1	SPBC1735		HCD	1	0	1	1				90	5.68046	0	0	0.248039	2	2	937.483	1873.96	-0.0487719	51.9494	12533	12533	MS2	21/32	120406QEx1_Gregan_Cipak_Sfr1-5A_try_10%.raw
	High	NAAQQAAEVLFKPMAER	Unambiguous	2	1	SPBC1735		HCD	1	0	1	1				95	5.0325	0	0	0.281222	5	3	625.325	1873.96	0.595456	52.2675	12612	12612	MS2	22/64	120406QEx1_Gregan_Cipak_Sfr1-5A_try_10%.raw
	High	NAAQQAAEVLFKPMAER	Unambiguous	2	1	SPBC1735		HCD	1	0	1	1				91	5.45328	0	0	0.481727	35	2	937.483	1873.96	0.0163684	52.3078	12624	12624	MS2	23/32	120406QEx1_Gregan_Cipak_Sfr1-5A_try_10%.raw
	High	NAAQQAAEVLFKPMAER	Unambiguous	2	1	SPBC1735		HCD	1	0	1	1				92	5.00592	0	0	0.644068	18	3	625.325	1873.96	0.497745	52.6266	12701	12701	MS2	23/64	120406QEx1_Gregan_Cipak_Sfr1-5A_try_10%.raw
	High	NAAQQAAEVLFKPMAER	Unambiguous	2	1	SPBC1735		HCD	1	0	1	1				92	5.53405	0	0	1.60366	214	2	937.483	1873.96	0.0163684	52.6727	12712	12712	MS2	20/32	120406QEx1_Gregan_Cipak_Sfr1-5A_try_10%.raw
	High	NAAQQAAEVLFKPMAER	Unambiguous	2	1	SPBC1735		HCD	1	0	1	1				96	5.16634	0	0	4.76229	44	3	625.324	1873.96	-0.0885175	52.99	12789	12789	MS2	22/64	120406QEx1_Gregan_Cipak_Sfr1-5A_try_10%.raw
	High	NAAQQAAEVLFKPMAER	Unambiguous	2	1	SPBC1735		HCD	1	0	1	1				89	5.22457	0	0	2.1774	250	2	937.483	1873.96	0.146649	53.033	12801	12801	MS2	19/32	120406QEx1_Gregan_Cipak_Sfr1-5A_try_10%.raw
	High	NAAQQAAEVLFKPMAER	Unambiguous	2	1	SPBC1735		HCD	1	0	1	1				95	5.09052	0	0	5.51428	60	3	625.325	1873.96	0.204614	53.3505	12878	12878	MS2	22/64	120406QEx1_Gregan_Cipak_Sfr1-5A_try_10%.raw
	High	NAAQQAAEVLFKPMAER	Unambiguous	2	1	SPBC1735		HCD	1	0	1	1				93	5.11895	0	0	0	250	2	937.482	1873.96	-0.830457	53.3992	12892	12892	MS2	19/32	120406QEx1_Gregan_Cipak_Sfr1-5A_try_10%.raw
	High	NAAQQAAEVLFKPMAER	Unambiguous	2	1	SPBC1735		HCD	1	0	1	1				95	4.91504	0	0	26.9859	51	3	625.325	1873.96	0.00919302	53.7242	12966	12966	MS2	23/64	120406QEx1_Gregan_Cipak_Sfr1-5A_try_10%.raw
	High	NAAQQAAEVLFKPMAER	Unambiguous	2	1	SPBC1735		HCD	1	0	1	1				94	5.16001	0	0	2.62939	250	2	937.484	1873.96	0.602631	53.7693	12978	12978	MS2	19/32	120406QEx1_Gregan_Cipak_Sfr1-5A_try_10%.raw
	High	NAAQQAAEVLFKPMAER	Unambiguous	2	1	SPBC1735		HCD	1	0	1	1				97	5.50726	0	0	27.0768	104	3	625.324	1873.96	-0.186228	54.8117	13228	13228	MS2	23/64	120406QEx1_Gregan_Cipak_Sfr1-5A_try_10%.raw
	High	NAAQQAAEVLFKPMAER	Unambiguous	2	1	SPBC1735		HCD	1	0	1	1				95	5.41279	0	0	1.1361	127	3	625.324	1873.96	-0.186228	55.2445	13332	13332	MS2	22/64	120406QEx1_Gregan_Cipak_Sfr1-5A_try_10%.raw
	High	NAAQQAAEVLFKPMAER	Unambiguous	2	1	SPBC1735		HCD	1	0	1	1				89	4.8985	0	0	32.8875	174	3	625.325	1873.96	0.204614	55.6844	13438	13438	MS2	19/64	120406QEx1_Gregan_Cipak_Sfr1-5A_try_10%.raw
	High	NAAQQAAEVLFKPMAER	Unambiguous	2	1	SPBC1735		HCD	1	0	1	1				98	5.51169	0	0	0	250	3	625.324	1873.96	-1.06562	56.0516	13520	13520	MS2	20/64	120406QEx1_Gregan_Cipak_Sfr1-5A_try_10%.raw
	High	NAAQQAAEVLFKPMAER	Unambiguous	2	1	SPBC1735		HCD	1	0	1	1				99	5.04426	0	0	0	250	3	625.324	1873.96	-1.26105	56.5251	13632	13632	MS2	21/64	120406QEx1_Gregan_Cipak_Sfr1-5A_try_10%.raw
	High	NAAQQAAEVLFKPMAER	Unambiguous	2	1	SPBC1735		HCD	1	0	1	1				103	4.95824	0	0	25.9436	250	3	625.325	1873.96	0.790876	56.8928	13716	13716	MS2	18/64	120406QEx1_Gregan_Cipak_Sfr1-5A_try_10%.raw
	High	NAAQQAAEVLFKPMAER	Unambiguous	2	1	SPBC1735		HCD	1	0	1	1				103	4.47897	0	0	38.9419	250	3	625.324	1873.96	-0.0885175	57.3348	13819	13819	MS2	20/64	120406QEx1_Gregan_Cipak_Sfr1-5A_try_10%.raw
	High	NAAQQAAEVLFKPMAER	Unambiguous	2	1	SPBC1735		HCD	1	0	1	1				108	4.64222	0	0	30.0007	250	3	625.325	1873.96	0.302324	58.9696	14188	14188	MS2	19/64	120406QEx1_Gregan_Cipak_Sfr1-5A_try_10%.raw
	High	NAAQQAAEVLFKPMAER	Unambiguous	2	1	SPBC1735		HCD	1	0	1	1				105	3.37852	0	0	41.1661	250	3	625.325	1873.96	0.106904	61.7806	14816	14816	MS2	19/64	120406QEx1_Gregan_Cipak_Sfr1-5A_try_10%.raw
	High	NAAQQAAEVLFKPMAER	Unambiguous	2	1	SPBC1735		HCD	1	0	1	1				104	3.327	0	0	46.346	250	3	625.323	1873.95	-2.82442	62.453	14969	14969	MS2	17/64	120406QEx1_Gregan_Cipak_Sfr1-5A_try_10%.raw
	Medium	NAAQQAAEVLFKPMAER	Unambiguous	2	1	SPBC1735		HCD	1	0	1	1				91	2.51751	0	0	46.6591	250	3	625.326	1873.96	1.76798	68.2951	16269	16269	MS2	14/64	120406QEx1_Gregan_Cipak_Sfr1-5A_try_10%.raw
	Medium	NEDKDLQTLIQK	Unambiguous	2	1	SPBC1735		HCD	1	0	1	1				79	2.09597	0	1	10.3817	250	2	722.886	1444.76	-0.206044	28.299	6473	6473	MS2	8/22	120406QEx1_Gregan_Cipak_Sfr1-5A_try_10%.raw
	High	NEDKDLQTLIQK	Unambiguous	2	1	SPBC1735		HCD	1	0	1	1				84	3.13414	0	1	50.3725	140	2	722.885	1444.76	-0.375028	37.7413	8845	8845	MS2	10/22	120406QEx1_Gregan_Cipak_Sfr1-5A_try_10%.raw
	High	NEDKDLQTLIQK	Unambiguous	2	1	SPBC1735		HCD	1	0	1	1				89	5.21982	0	1	0	250	2	722.886	1444.76	-0.290536	38.0924	8939	8939	MS2	17/22	120406QEx1_Gregan_Cipak_Sfr1-5A_try_10%.raw
	Medium	NEDKDLQTLIQK	Unambiguous	2	1	SPBC1735		HCD	1	0	1	1				78	2.34628	0	1	0.402084	0	3	482.26	1444.77	1.0309	38.2836	8991	8991	MS2	10/44	120406QEx1_Gregan_Cipak_Sfr1-5A_try_10%.raw
	High	NEDKDLQTLIQK	Unambiguous	2	1	SPBC1735		HCD	1	0	1	1				83	5.06447	0	1	0.131974	0	2	722.885	1444.76	-0.628502	38.4429	9031	9031	MS2	18/22	120406QEx1_Gregan_Cipak_Sfr1-5A_try_10%.raw
	Medium	NEDKDLQTLIQK	Unambiguous	2	1	SPBC1735		HCD	1	0	1	1				80	2.59824	0	1	0.7139	4	3	482.26	1444.77	0.523949	38.6579	9084	9084	MS2	11/44	120406QEx1_Gregan_Cipak_Sfr1-5A_try_10%.raw
	High	NEDKDLQTLIQK	Unambiguous	2	1	SPBC1735		HCD	1	0	1	1				82	4.70673	0	1	0.985987	11	2	722.885	1444.76	-0.628502	38.7835	9116	9116	MS2	17/22	120406QEx1_Gregan_Cipak_Sfr1-5A_try_10%.raw
	Medium	NEDKDLQTLIQK	Unambiguous	2	1	SPBC1735		HCD	1	0	1	1				80	2.58845	0	1	1.89791	20	3	482.26	1444.76	0.270475	39.0159	9175	9175	MS2	13/44	120406QEx1_Gregan_Cipak_Sfr1-5A_try_10%.raw
	High	NEDKDLQTLIQK	Unambiguous	2	1	SPBC1735		HCD	1	0	1	1				82	5.16048	0	1	0.64825	32	2	722.885	1444.76	-0.797486	39.1369	9208	9208	MS2	18/22	120406QEx1_Gregan_Cipak_Sfr1-5A_try_10%.raw
	High	NEDKDLQTLIQK	Unambiguous	2	1	SPBC1735		HCD	1	0	1	1				75	2.78562	0	1	0	48	3	482.26	1444.77	1.0309	39.3842	9274	9274	MS2	12/44	120406QEx1_Gregan_Cipak_Sfr1-5A_try_10%.raw
	High	NEDKDLQTLIQK	Unambiguous	2	1	SPBC1735		HCD	1	0	1	1				86	4.90673	0	1	2.05927	55	2	722.885	1444.76	-1.38893	39.4916	9308	9308	MS2	18/22	120406QEx1_Gregan_Cipak_Sfr1-5A_try_10%.raw
	High	NEDKDLQTLIQK	Unambiguous	2	1	SPBC1735		HCD	1	0	1	1				79	2.92384	0	1	5.9766	69	3	482.26	1444.76	0.333843	39.7583	9374	9374	MS2	11/44	120406QEx1_Gregan_Cipak_Sfr1-5A_try_10%.raw
	High	NEDKDLQTLIQK	Unambiguous	2	1	SPBC1735		HCD	1	0	1	1				82	4.76308	0	1	0.899813	72	2	722.885	1444.76	-0.797486	39.8499	9397	9397	MS2	18/22	120406QEx1_Gregan_Cipak_Sfr1-5A_try_10%.raw
	High	NEDKDLQTLIQK	Unambiguous	2	1	SPBC1735		HCD	1	0	1	1				83	4.52126	0	1	8.09172	55	2	722.885	1444.76	-0.544011	40.2157	9495	9495	MS2	16/22	120406QEx1_Gregan_Cipak_Sfr1-5A_try_10%.raw
	Medium	NEDKDLQTLIQK	Unambiguous	2	1	SPBC1735		HCD	1	0	1	1				89	2.50412	0	1	18.3725	97	3	482.261	1444.77	1.91806	40.6039	9597	9597	MS2	11/44	120406QEx1_Gregan_Cipak_Sfr1-5A_try_10%.raw
	Medium	NEDKDLQTLIQK	Unambiguous	2	1	SPBC1735		HCD	1	0	1	1				86	2.34611	0	1	25.7004	119	3	482.26	1444.76	0.333843	41.2027	9751	9751	MS2	10/44	120406QEx1_Gregan_Cipak_Sfr1-5A_try_10%.raw
	High	NEDKDLQTLIQK	Unambiguous	2	1	SPBC1735		HCD	1	0	1	1				99	4.64578	0	1	49.6689	182	2	722.885	1444.76	-1.38893	41.3784	9797	9797	MS2	16/22	120406QEx1_Gregan_Cipak_Sfr1-5A_try_10%.raw
	Medium	NEDKDLQTLIQK	Unambiguous	2	1	SPBC1735		HCD	1	0	1	1				85	2.32029	0	1	33.2712	180	3	482.26	1444.76	0.46058	41.5819	9848	9848	MS2	10/44	120406QEx1_Gregan_Cipak_Sfr1-5A_try_10%.raw
	High	NEDKDLQTLIQK	Unambiguous	2	1	SPBC1735		HCD	1	0	1	1				86	4.86596	0	1	12.4278	250	2	722.886	1444.76	0.300905	41.7711	9899	9899	MS2	15/22	120406QEx1_Gregan_Cipak_Sfr1-5A_try_10%.raw
	Medium	NEDKDLQTLIQK	Unambiguous	2	1	SPBC1735		HCD	1	0	1	1				94	2.29127	0	1	14.8191	250	3	482.259	1444.76	-1.82069	42.9441	10217	10217	MS2	10/44	120406QEx1_Gregan_Cipak_Sfr1-5A_try_10%.raw
	High	NEDKDLQTLIQK	Unambiguous	2	1	SPBC1735		HCD	1	0	1	1				92	4.41583	0	1	32.1732	250	2	722.884	1444.76	-2.65631	42.9536	10219	10219	MS2	15/22	120406QEx1_Gregan_Cipak_Sfr1-5A_try_10%.raw
	High	NEDKDLQTLIQK	Unambiguous	2	1	SPBC1735		HCD	1	0	1	1				95	3.30864	0	1	56.7044	250	2	722.885	1444.76	-0.966469	43.3187	10310	10310	MS2	13/22	120406QEx1_Gregan_Cipak_Sfr1-5A_try_10%.raw
	High	NEDKDLQTLIQKWK	Unambiguous	2	1	SPBC1735		HCD	1	0	1	1				72	4.88967	0	2	17.1976	173	3	586.984	1758.94	0.0116263	48.7118	11698	11698	MS2	16/52	120406QEx1_Gregan_Cipak_Sfr1-5A_try_10%.raw
	High	NEDKDLQTLIQKWK	Unambiguous	2	1	SPBC1735		HCD	1	0	1	1				68	5.7502	0	2	7.00166	250	2	879.972	1758.94	-0.84823	48.772	11711	11711	MS2	20/26	120406QEx1_Gregan_Cipak_Sfr1-5A_try_10%.raw
	High	NILLKPFK	Unambiguous	2	1	SPBC1735		HCD	1	0	1	1				13	2.35271	0	0	25.7599	214	2	486.815	972.624	-0.417916	39.2708	9245	9245	MS2	9/14	120406QEx1_Gregan_Cipak_Sfr1-5A_try_10%.raw
	Medium	NILLKPFK	Unambiguous	2	1	SPBC1735		HCD	1	0	1	1				13	2.19033	0	0	2.02455	2	2	486.816	972.625	0.711639	39.6316	9341	9341	MS2	8/14	120406QEx1_Gregan_Cipak_Sfr1-5A_try_10%.raw
	Medium	NILLKPFK	Unambiguous	2	1	SPBC1735		HCD	1	0	1	1				13	2.20436	0	0	6.47068	23	2	486.816	972.624	-0.355163	39.9747	9429	9429	MS2	8/14	120406QEx1_Gregan_Cipak_Sfr1-5A_try_10%.raw
	High	NILLKPFK	Unambiguous	2	1	SPBC1735		HCD	1	0	1	1				13	2.21923	0	0	28.7085	67	2	486.816	972.624	-0.166903	40.347	9528	9528	MS2	8/14	120406QEx1_Gregan_Cipak_Sfr1-5A_try_10%.raw
	Medium	NILLKPFK	Unambiguous	2	1	SPBC1735		HCD	1	0	1	1				13	2.13361	0	0	35.713	116	2	486.816	972.624	-0.355163	40.772	9641	9641	MS2	8/14	120406QEx1_Gregan_Cipak_Sfr1-5A_try_10%.raw
	Low	NILLKPFK	Unconsidered	2	1	SPBC1735		HCD	1	0	1	1				13	1.73553	0	0	63.6396	250	2	486.815	972.623	-1.04545	41.998	9963	9963	MS2	8/14	120406QEx1_Gregan_Cipak_Sfr1-5A_try_10%.raw
	High	NILLKPFKAPLR	Unambiguous	1	1	SPBC1735		HCD	1	0	1	1				3	2.87651	0	1	37.5103	250	3	470.638	1409.9	-0.467135	40.5954	9594	9594	MS2	13/44	120406QEx1_Gregan_Cipak_Sfr1-5A_try_10%.raw
	High	NILLKPFKAPLR	Unambiguous	1	1	SPBC1735		HCD	1	0	1	1				3	3.53884	0	1	7.78073	208	2	705.453	1409.9	-0.0679834	40.693	9621	9621	MS2	12/22	120406QEx1_Gregan_Cipak_Sfr1-5A_try_10%.raw
	Medium	NILLKPFKAPLR	Unambiguous	1	1	SPBC1735		HCD	1	0	1	1				3	2.54415	0	1	2.07394	69	4	353.23	1409.9	-0.606543	40.7695	9640	9640	MS2	12/66	120406QEx1_Gregan_Cipak_Sfr1-5A_try_10%.raw
	High	NILLKPFKAPLR	Unambiguous	1	1	SPBC1735		HCD	1	0	1	1				3	3.39821	0	1	1.36918	14	3	470.638	1409.9	0.247158	40.9374	9682	9682	MS2	16/44	120406QEx1_Gregan_Cipak_Sfr1-5A_try_10%.raw
	High	NILLKPFKAPLR	Unambiguous	1	1	SPBC1735		HCD	1	0	1	1				3	3.30422	0	1	0	163	2	705.454	1409.9	0.711244	41.0418	9713	9713	MS2	12/22	120406QEx1_Gregan_Cipak_Sfr1-5A_try_10%.raw
	High	NILLKPFKAPLR	Unambiguous	1	1	SPBC1735		HCD	1	0	1	1				3	2.78305	0	1	17.2293	171	3	470.638	1409.9	0.117286	41.2858	9773	9773	MS2	13/44	120406QEx1_Gregan_Cipak_Sfr1-5A_try_10%.raw
	Medium	NILLKPFKAPLR	Unambiguous	1	1	SPBC1735		HCD	1	0	1	1				3	2.38193	0	1	9.09408	250	3	470.638	1409.9	0.441965	41.6683	9870	9870	MS2	13/44	120406QEx1_Gregan_Cipak_Sfr1-5A_try_10%.raw
	High	NLQEQLITAETAR	Unambiguous	2	1	SPBC1735		HCD	1	0	1	1				71	3.46095	0	0	32.6733	216	3	496.267	1486.79	0.625267	39.8238	9390	9390	MS2	13/48	120406QEx1_Gregan_Cipak_Sfr1-5A_try_10%.raw
	High	NLQEQLITAETAR	Unambiguous	2	1	SPBC1735		HCD	1	0	1	1				62	3.45664	0	0	11.1001	250	2	743.896	1486.79	-0.576715	39.9588	9425	9425	MS2	14/24	120406QEx1_Gregan_Cipak_Sfr1-5A_try_10%.raw
	High	NLQEQLITAETAR	Unambiguous	2	1	SPBC1735		HCD	1	0	1	1				72	4.29399	0	0	27.7262	164	2	743.896	1486.79	-0.494611	44.8928	10714	10714	MS2	15/24	120406QEx1_Gregan_Cipak_Sfr1-5A_try_10%.raw
	High	NLQEQLITAETAR	Unambiguous	2	1	SPBC1735		HCD	1	0	1	1				71	3.40607	0	0	47.2347	151	3	496.267	1486.79	-0.544707	44.9506	10729	10729	MS2	13/48	120406QEx1_Gregan_Cipak_Sfr1-5A_try_10%.raw
	High	NLQEQLITAETAR	Unambiguous	2	1	SPBC1735		HCD	1	0	1	1				66	4.52742	0	0	16.551	250	2	743.895	1486.78	-1.97248	46.3043	11079	11079	MS2	17/24	120406QEx1_Gregan_Cipak_Sfr1-5A_try_10%.raw
	High	NLQEQLITAETAR	Unambiguous	2	1	SPBC1735		HCD	1	0	1	1				61	4.50281	0	0	2.90524	15	3	496.267	1486.79	0.194224	46.3498	11090	11090	MS2	16/48	120406QEx1_Gregan_Cipak_Sfr1-5A_try_10%.raw
	High	NLQEQLITAETAR	Unambiguous	2	1	SPBC1735		HCD	1	0	1	1				65	4.23448	0	0	0.0909951	0	2	743.897	1486.79	0.901147	46.6466	11174	11174	MS2	16/24	120406QEx1_Gregan_Cipak_Sfr1-5A_try_10%.raw
	High	NLQEQLITAETAR	Unambiguous	2	1	SPBC1735		HCD	1	0	1	1				64	4.33985	0	0	0.133261	1	3	496.267	1486.79	0.81	46.6938	11185	11185	MS2	16/48	120406QEx1_Gregan_Cipak_Sfr1-5A_try_10%.raw
	High	NLQEQLITAETAR	Unambiguous	2	1	SPBC1735		HCD	1	0	1	1				62	4.45852	0	0	0.352709	4	2	743.897	1486.79	-0.00199024	46.9954	11259	11259	MS2	17/24	120406QEx1_Gregan_Cipak_Sfr1-5A_try_10%.raw
	High	NLQEQLITAETAR	Unambiguous	2	1	SPBC1735		HCD	1	0	1	1				56	4.18422	0	0	0.520866	20	3	496.267	1486.79	0.194224	47.0834	11279	11279	MS2	16/48	120406QEx1_Gregan_Cipak_Sfr1-5A_try_10%.raw
	High	NLQEQLITAETAR	Unambiguous	2	1	SPBC1735		HCD	1	0	1	1				62	4.03163	0	0	5.22814	18	2	743.896	1486.79	-0.658819	47.3817	11356	11356	MS2	17/24	120406QEx1_Gregan_Cipak_Sfr1-5A_try_10%.raw
	High	NLQEQLITAETAR	Unambiguous	2	1	SPBC1735		HCD	1	0	1	1				61	4.04657	0	0	14.6447	65	3	496.267	1486.79	-0.236819	47.4687	11378	11378	MS2	15/48	120406QEx1_Gregan_Cipak_Sfr1-5A_try_10%.raw
	High	NLQEQLITAETAR	Unambiguous	2	1	SPBC1735		HCD	1	0	1	1				61	4.10999	0	0	9.80052	34	2	743.896	1486.79	-0.412508	47.7573	11455	11455	MS2	16/24	120406QEx1_Gregan_Cipak_Sfr1-5A_try_10%.raw
	High	NLQEQLITAETAR	Unambiguous	2	1	SPBC1735		HCD	1	0	1	1				58	3.54504	0	0	2.73102	97	3	496.267	1486.79	-0.421552	47.8489	11478	11478	MS2	15/48	120406QEx1_Gregan_Cipak_Sfr1-5A_try_10%.raw
	High	NLQEQLITAETAR	Unambiguous	2	1	SPBC1735		HCD	1	0	1	1				75	4.21374	0	0	44.8136	43	2	743.896	1486.78	-1.47986	48.2727	11592	11592	MS2	17/24	120406QEx1_Gregan_Cipak_Sfr1-5A_try_10%.raw
	High	NLQEQLITAETAR	Unambiguous	2	1	SPBC1735		HCD	1	0	1	1				70	3.02085	0	0	53.9276	92	3	496.266	1486.78	-0.791018	48.3368	11609	11609	MS2	14/48	120406QEx1_Gregan_Cipak_Sfr1-5A_try_10%.raw
	High	NLQEQLITAETAR	Unambiguous	2	1	SPBC1735		HCD	1	0	1	1				63	4.11313	0	0	3.42609	55	2	743.896	1486.78	-0.740922	48.6637	11686	11686	MS2	16/24	120406QEx1_Gregan_Cipak_Sfr1-5A_try_10%.raw
	High	NLQEQLITAETAR	Unambiguous	2	1	SPBC1735		HCD	1	0	1	1				68	3.86956	0	0	11.0313	162	3	496.267	1486.79	0.132647	48.7036	11696	11696	MS2	15/48	120406QEx1_Gregan_Cipak_Sfr1-5A_try_10%.raw
	High	NLQEQLITAETAR	Unambiguous	2	1	SPBC1735		HCD	1	0	1	1				67	4.21974	0	0	25.2216	70	2	743.896	1486.78	-1.47986	49.0261	11774	11774	MS2	17/24	120406QEx1_Gregan_Cipak_Sfr1-5A_try_10%.raw
	High	NLQEQLITAETAR	Unambiguous	2	1	SPBC1735		HCD	1	0	1	1				69	3.8119	0	0	17.4522	210	3	496.267	1486.79	0.194224	49.0569	11784	11784	MS2	15/48	120406QEx1_Gregan_Cipak_Sfr1-5A_try_10%.raw
	High	NLQEQLITAETAR	Unambiguous	2	1	SPBC1735		HCD	1	0	1	1				75	4.07451	0	0	41.9803	83	2	743.897	1486.79	0.326424	49.9939	12011	12011	MS2	14/24	120406QEx1_Gregan_Cipak_Sfr1-5A_try_10%.raw
	Medium	NLQEQLITAETAR	Unambiguous	2	1	SPBC1735		HCD	1	0	1	1				71	2.671	0	0	9.14028	250	3	496.267	1486.79	0.994732	50.3381	12103	12103	MS2	14/48	120406QEx1_Gregan_Cipak_Sfr1-5A_try_10%.raw
	High	NLQEQLITAETAR	Unambiguous	2	1	SPBC1735		HCD	1	0	1	1				72	4.27601	0	0	27.0555	162	2	743.896	1486.79	-0.494611	50.362	12109	12109	MS2	15/24	120406QEx1_Gregan_Cipak_Sfr1-5A_try_10%.raw
	High	NLQEQLITAETAR	Unambiguous	2	1	SPBC1735		HCD	1	0	1	1				71	4.25488	0	0	32.4249	250	2	743.896	1486.79	-0.330404	51.3388	12375	12375	MS2	12/24	120406QEx1_Gregan_Cipak_Sfr1-5A_try_10%.raw
	High	NLQEQLITAETAR	Unambiguous	2	1	SPBC1735		HCD	1	0	1	1				74	3.93386	0	0	60.4974	250	2	743.899	1486.79	3.69265	52.4782	12665	12665	MS2	14/24	120406QEx1_Gregan_Cipak_Sfr1-5A_try_10%.raw
	High	NLQEQLITAETAR	Unambiguous	2	1	SPBC1735		HCD	1	0	1	1				70	3.81688	0	0	33.7131	250	2	743.896	1486.78	-0.823026	55.4543	13381	13381	MS2	12/24	120406QEx1_Gregan_Cipak_Sfr1-5A_try_10%.raw
	High	NLQEQLITAETAR	Unambiguous	2	1	SPBC1735		HCD	1	0	1	1				75	3.68717	0	0	41.3359	250	2	743.896	1486.78	-1.39775	55.9166	13489	13489	MS2	13/24	120406QEx1_Gregan_Cipak_Sfr1-5A_try_10%.raw
	High	NLQEQLITAETAR	Unambiguous	2	1	SPBC1735		HCD	1	0	1	1				75	3.07055	0	0	53.996	250	2	743.897	1486.79	0.49063	61.103	14665	14665	MS2	11/24	120406QEx1_Gregan_Cipak_Sfr1-5A_try_10%.raw
	High	NLQEQLITAETAR	Unambiguous	2	1	SPBC1735		HCD	1	0	1	1				71	3.52817	0	0	19.266	250	2	743.897	1486.79	0.162217	62.3706	14952	14952	MS2	15/24	120406QEx1_Gregan_Cipak_Sfr1-5A_try_10%.raw
	High	NLQEQLITAETAR	Unambiguous	2	1	SPBC1735		HCD	1	0	1	1				70	3.32848	0	0	24.7005	250	2	743.896	1486.78	-0.905129	66.007	15759	15759	MS2	13/24	120406QEx1_Gregan_Cipak_Sfr1-5A_try_10%.raw
	High	NLQEQLITAETAR	Unambiguous	2	1	SPBC1735		HCD	1	0	1	1				71	3.14486	0	0	65.4612	250	2	743.897	1486.79	-0.0840937	67.5327	16096	16096	MS2	14/24	120406QEx1_Gregan_Cipak_Sfr1-5A_try_10%.raw
	High	NLQEQLITAETAR	Unambiguous	2	1	SPBC1735		HCD	1	0	1	1				70	3.18657	0	0	9.84859	250	2	743.897	1486.79	0.162217	68.3856	16287	16287	MS2	13/24	120406QEx1_Gregan_Cipak_Sfr1-5A_try_10%.raw
	High	NLQEQLITAETARK	Unambiguous	2	1	SPBC1735		HCD	1	0	1	1				49	3.97737	0	1	0	250	2	807.945	1614.88	1.05687	40.4621	9559	9559	MS2	15/26	120406QEx1_Gregan_Cipak_Sfr1-5A_try_10%.raw
	High	NLQEQLITAETARK	Unambiguous	2	1	SPBC1735		HCD	1	0	1	1				49	3.79605	0	1	20.8918	121	3	538.965	1614.88	-0.198701	40.4759	9563	9563	MS2	14/52	120406QEx1_Gregan_Cipak_Sfr1-5A_try_10%.raw
spectrum OK	High	QTASPQVADTNLKPSLAVTNLNsDETNTSSEPVTSPLR	Unambiguous	2	1	SPBC1735	S23(Phospho)	HCD	1	0	1	1	0.998935	T(2): 0.1; S(4): 0.0; T(10): 0.0; S(15): 0.0; T(19): 0.0; S(23): 99.9; T(26): 0.1; T(28): 0.0; S(29): 0.0; S(30): 0.0; T(34): 0.0; S(35): 0.0	312.249	1197	4.5861	0	0	1.84831	85	3	1354.99	4062.95	0.944269	52.1902	12591	12591	MS2	26/220	120406QEx1_Gregan_Cipak_Sfr1-5A_try_10%.raw
spectrum OK - T34/S35	High	QTASPQVADTNLKPSLAVTNLNSDETNTSSEPVTsPLR	Unambiguous	2	1	SPBC1735	S35(Phospho)	HCD	1	0	1	1	0.999539	T(2): 0.0; S(4): 0.0; T(10): 0.0; S(15): 0.0; T(19): 0.0; S(23): 0.0; T(26): 0.0; T(28): 0.0; S(29): 0.0; S(30): 0.0; T(34): 0.0; S(35): 100.0	448.563	905	5.11166	0	0	0	206	3	1354.99	4062.95	0.673866	57.7798	13919	13919	MS2	23/220	120406QEx1_Gregan_Cipak_Sfr1-5A_try_10%.raw
	High	QTASPQVADTNLKPSLAVTNLNSDETNTSSEPVTSPLR	Unambiguous	2	1	SPBC1735		HCD	1	0	1	1				510	7.74876	0	0	0	17	3	1328.33	3982.99	0.9995	49.0629	11786	11786	MS2	24/148	120406QEx1_Gregan_Cipak_Sfr1-5A_try_10%.raw
	High	QTASPQVADTNLKPSLAVTNLNSDETNTSSEPVTSPLR	Unambiguous	2	1	SPBC1735		HCD	1	0	1	1				631	6.83165	0	0	0.391804	29	4	996.502	3982.99	0.827561	49.0641	11787	11787	MS2	25/222	120406QEx1_Gregan_Cipak_Sfr1-5A_try_10%.raw
	High	QTASPQVADTNLKPSLAVTNLNSDETNTSSEPVTSPLR	Unambiguous	2	1	SPBC1735		HCD	1	0	1	1				520	6.9901	0	0	1.04283	25	3	1328.34	3982.99	1.91894	49.4302	11874	11874	MS2	25/148	120406QEx1_Gregan_Cipak_Sfr1-5A_try_10%.raw
	High	QTASPQVADTNLKPSLAVTNLNSDETNTSSEPVTSPLR	Unambiguous	2	1	SPBC1735		HCD	1	0	1	1				663	6.32344	0	0	0	48	3	1328.33	3982.97	-3.87354	49.8328	11970	11970	MS2	23/148	120406QEx1_Gregan_Cipak_Sfr1-5A_try_10%.raw
	High	QTASPQVADTNLKPSLAVTNLNSDETNTSSEPVTSPLR	Unambiguous	2	1	SPBC1735		HCD	1	0	1	1				411	7.00538	0	0	0	226	3	1328.33	3982.99	1.27533	54.1611	13072	13072	MS2	21/148	120406QEx1_Gregan_Cipak_Sfr1-5A_try_10%.raw
	High	QTASPQVADTNLKPSLAVTNLNSDETNTSSEPVTSPLR	Unambiguous	2	1	SPBC1735		HCD	1	0	1	1				503	5.3639	0	0	4.04304	28	3	1328.33	3982.99	0.539781	54.51	13153	13153	MS2	20/148	120406QEx1_Gregan_Cipak_Sfr1-5A_try_10%.raw
	High	QTASPQVADTNLKPSLAVTNLNSDETNTSSEPVTSPLR	Unambiguous	2	1	SPBC1735		HCD	1	0	1	1				387	6.31223	0	0	0	250	3	1328.34	3982.99	2.56254	55.0117	13275	13275	MS2	20/148	120406QEx1_Gregan_Cipak_Sfr1-5A_try_10%.raw
	Medium	RLKLEK	Unambiguous	2	1	SPBC1735		HCD	1	0	1	1				39	1.92759	0	2	32.8105	180	2	393.763	786.519	-0.622613	18.9776	4355	4355	MS2	7/10	120406QEx1_Gregan_Cipak_Sfr1-5A_try_10%.raw
spectrum OK	High	sDPEITQLLSR	Unambiguous	2	1	SPBC1735	S1(Phospho)	HCD	1	0	1	1	1	S(1): 100.0; T(6): 0.0; S(10): 0.0	230.941	95	2.83384	0	0	34.9028	250	2	669.821	1338.64	3.6717	59.5073	14309	14309	MS2	13/40	120406QEx1_Gregan_Cipak_Sfr1-5A_try_10%.raw
	High	SDPEITQLLSR	Unambiguous	2	1	SPBC1735		HCD	1	0	1	1				70	3.0186	0	0	21.0639	250	2	629.836	1258.66	0.528345	45.2644	10808	10808	MS2	13/20	120406QEx1_Gregan_Cipak_Sfr1-5A_try_10%.raw
	High	SDPEITQLLSR	Unambiguous	2	1	SPBC1735		HCD	1	0	1	1				56	3.71612	0	0	30.8953	33	2	629.836	1258.66	0.334378	50.8913	12252	12252	MS2	14/20	120406QEx1_Gregan_Cipak_Sfr1-5A_try_10%.raw
	Low	SDPEITQLLSR	Unconsidered	2	1	SPBC1735		HCD	1	0	1	1				55	2.11122	0	0	2.84847	35	3	420.226	1258.66	0.10548	50.9475	12266	12266	MS2	11/40	120406QEx1_Gregan_Cipak_Sfr1-5A_try_10%.raw
	High	SDPEITQLLSR	Unambiguous	2	1	SPBC1735		HCD	1	0	1	1				54	3.05293	0	0	0.885974	0	2	629.836	1258.66	0.0434255	51.2333	12346	12346	MS2	13/20	120406QEx1_Gregan_Cipak_Sfr1-5A_try_10%.raw
	High	SDPEITQLLSR	Unambiguous	2	1	SPBC1735		HCD	1	0	1	1				63	2.80392	0	0	2.77034	21	3	420.226	1258.66	-0.330948	51.2856	12359	12359	MS2	14/40	120406QEx1_Gregan_Cipak_Sfr1-5A_try_10%.raw
	High	SDPEITQLLSR	Unambiguous	2	1	SPBC1735		HCD	1	0	1	1				52	3.41683	0	0	10.5883	4	2	629.836	1258.66	-0.0535585	51.5851	12438	12438	MS2	13/20	120406QEx1_Gregan_Cipak_Sfr1-5A_try_10%.raw
	High	SDPEITQLLSR	Unambiguous	2	1	SPBC1735		HCD	1	0	1	1				50	3.00105	0	0	32.8519	15	2	629.834	1258.66	-1.89626	51.9277	12527	12527	MS2	12/20	120406QEx1_Gregan_Cipak_Sfr1-5A_try_10%.raw
	High	SDPEITQLLSR	Unambiguous	2	1	SPBC1735		HCD	1	0	1	1				62	3.31198	0	0	44.0603	20	2	629.836	1258.66	-0.0535585	52.3065	12623	12623	MS2	13/20	120406QEx1_Gregan_Cipak_Sfr1-5A_try_10%.raw
	High	SDPEITQLLSR	Unambiguous	2	1	SPBC1735		HCD	1	0	1	1				56	2.87353	0	0	6.53694	27	2	629.835	1258.66	-0.247527	52.6787	12714	12714	MS2	12/20	120406QEx1_Gregan_Cipak_Sfr1-5A_try_10%.raw
	High	SDPEITQLLSR	Unambiguous	2	1	SPBC1735		HCD	1	0	1	1				56	3.37069	0	0	9.42332	42	2	629.835	1258.66	-0.247527	53.0282	12800	12800	MS2	13/20	120406QEx1_Gregan_Cipak_Sfr1-5A_try_10%.raw
	High	SDPEITQLLSR	Unambiguous	2	1	SPBC1735		HCD	1	0	1	1				56	2.93021	0	0	13.6342	55	2	629.836	1258.66	0.237394	53.3904	12890	12890	MS2	13/20	120406QEx1_Gregan_Cipak_Sfr1-5A_try_10%.raw
	High	SDPEITQLLSR	Unambiguous	2	1	SPBC1735		HCD	1	0	1	1				59	3.05341	0	0	10.9645	75	2	629.836	1258.66	-0.0535585	53.7645	12977	12977	MS2	13/20	120406QEx1_Gregan_Cipak_Sfr1-5A_try_10%.raw
	High	SDPEITQLLSR	Unambiguous	2	1	SPBC1735		HCD	1	0	1	1				64	3.00669	0	0	11.0646	52	2	629.836	1258.66	0.625329	54.109	13058	13058	MS2	13/20	120406QEx1_Gregan_Cipak_Sfr1-5A_try_10%.raw
	High	SDPEITQLLSR	Unambiguous	2	1	SPBC1735		HCD	1	0	1	1				60	3.09142	0	0	19.734	95	2	629.836	1258.66	0.0434255	54.4659	13143	13143	MS2	13/20	120406QEx1_Gregan_Cipak_Sfr1-5A_try_10%.raw
	High	SDPEITQLLSR	Unambiguous	2	1	SPBC1735		HCD	1	0	1	1				61	3.44966	0	0	25.9922	129	2	629.835	1258.66	-0.635463	54.8144	13229	13229	MS2	12/20	120406QEx1_Gregan_Cipak_Sfr1-5A_try_10%.raw
	High	SDPEITQLLSR	Unambiguous	2	1	SPBC1735		HCD	1	0	1	1				65	3.33607	0	0	26.5967	133	2	629.835	1258.66	-0.441495	55.1849	13317	13317	MS2	13/20	120406QEx1_Gregan_Cipak_Sfr1-5A_try_10%.raw
	High	SDPEITQLLSR	Unambiguous	2	1	SPBC1735		HCD	1	0	1	1				73	3.25919	0	0	10.0951	136	2	629.836	1258.66	0.237394	55.5592	13407	13407	MS2	14/20	120406QEx1_Gregan_Cipak_Sfr1-5A_try_10%.raw
	High	SDPEITQLLSR	Unambiguous	2	1	SPBC1735		HCD	1	0	1	1				61	3.46499	0	0	7.22712	163	2	629.835	1258.66	-1.21737	55.9083	13487	13487	MS2	13/20	120406QEx1_Gregan_Cipak_Sfr1-5A_try_10%.raw
	High	SDPEITQLLSR	Unambiguous	2	1	SPBC1735		HCD	1	0	1	1				63	3.11128	0	0	30.1323	250	2	629.836	1258.66	0.722313	56.3667	13597	13597	MS2	13/20	120406QEx1_Gregan_Cipak_Sfr1-5A_try_10%.raw
	High	SDPEITQLLSR	Unambiguous	2	1	SPBC1735		HCD	1	0	1	1				65	3.24715	0	0	11.064	250	2	629.835	1258.66	-1.41134	56.8881	13715	13715	MS2	13/20	120406QEx1_Gregan_Cipak_Sfr1-5A_try_10%.raw
	High	SDPEITQLLSR	Unambiguous	2	1	SPBC1735		HCD	1	0	1	1				73	3.26586	0	0	13.8347	250	2	629.836	1258.66	0.819297	57.248	13799	13799	MS2	13/20	120406QEx1_Gregan_Cipak_Sfr1-5A_try_10%.raw
	High	SDPEITQLLSR	Unambiguous	2	1	SPBC1735		HCD	1	0	1	1				73	2.76506	0	0	80.5038	232	2	629.835	1258.66	-0.538479	57.6801	13897	13897	MS2	12/20	120406QEx1_Gregan_Cipak_Sfr1-5A_try_10%.raw
	High	SDPEITQLLSR	Unambiguous	2	1	SPBC1735		HCD	1	0	1	1				54	3.34214	0	0	40.4531	250	2	629.835	1258.66	-1.21737	58.0322	13975	13975	MS2	13/20	120406QEx1_Gregan_Cipak_Sfr1-5A_try_10%.raw
	High	SDPEITQLLSR	Unambiguous	2	1	SPBC1735		HCD	1	0	1	1				73	2.87812	0	0	0	250	2	629.835	1258.66	-0.538479	58.4219	14062	14062	MS2	12/20	120406QEx1_Gregan_Cipak_Sfr1-5A_try_10%.raw
	High	SDPEITQLLSR	Unambiguous	2	1	SPBC1735		HCD	1	0	1	1				61	2.88589	0	0	18.2499	250	2	629.835	1258.66	-0.829432	58.7691	14144	14144	MS2	13/20	120406QEx1_Gregan_Cipak_Sfr1-5A_try_10%.raw
	High	SDPEITQLLSR	Unambiguous	2	1	SPBC1735		HCD	1	0	1	1				64	3.19695	0	0	22.0245	250	2	629.835	1258.66	-0.441495	59.2144	14242	14242	MS2	12/20	120406QEx1_Gregan_Cipak_Sfr1-5A_try_10%.raw
	High	SDPEITQLLSR	Unambiguous	2	1	SPBC1735		HCD	1	0	1	1				73	2.8743	0	0	22.0622	250	2	629.836	1258.66	0.237394	59.7732	14371	14371	MS2	11/20	120406QEx1_Gregan_Cipak_Sfr1-5A_try_10%.raw
	High	SDPEITQLLSR	Unambiguous	2	1	SPBC1735		HCD	1	0	1	1				73	2.67359	0	0	34.2151	250	2	629.835	1258.66	-0.150543	61.1758	14681	14681	MS2	12/20	120406QEx1_Gregan_Cipak_Sfr1-5A_try_10%.raw
	Medium	SDPEITQLLSRR	Unambiguous	2	1	SPBC1735		HCD	1	0	1	1				59	2.60583	0	1	26.4915	174	3	472.26	1414.76	-0.391504	45.1995	10792	10792	MS2	10/44	120406QEx1_Gregan_Cipak_Sfr1-5A_try_10%.raw
	Medium	SDPEITQLLSRR	Unambiguous	2	1	SPBC1735		HCD	1	0	1	1				41	1.85613	0	1	29.3344	235	2	707.886	1414.76	-0.0800087	45.2039	10793	10793	MS2	9/22	120406QEx1_Gregan_Cipak_Sfr1-5A_try_10%.raw
	High	TEFTmSmFLNQFGVPVHLmSFDEENGDWK	Unambiguous	2	1	SPBC1735	M5(Oxidation); M7(Oxidation); M19(Oxidation)	HCD	1	0	1	1				1473	4.29899	0	0	5.40753	250	3	1162.18	3484.53	3.03882	63.6919	15245	15245	MS2	17/112	120406QEx1_Gregan_Cipak_Sfr1-5A_try_10%.raw
	High	TEFTmSmFLNQFGVPVHLMSFDEENGDWK	Unambiguous	2	1	SPBC1735	M5(Oxidation); M7(Oxidation)	HCD	1	0	1	1				1235	5.6275	0	0	1.62613	250	3	1156.85	3468.53	1.34044	67.382	16061	16061	MS2	20/112	120406QEx1_Gregan_Cipak_Sfr1-5A_try_10%.raw
	High	TEFTmSMFLNQFGVPVHLmSFDEENGDWK	Unambiguous	2	1	SPBC1735	M5(Oxidation); M19(Oxidation)	HCD	1	0	1	1				932	3.89206	0	0	5.2122	250	3	1156.84	3468.51	-2.9884	65.7984	15713	15713	MS2	18/112	120406QEx1_Gregan_Cipak_Sfr1-5A_try_10%.raw
	High	TEFTmSMFLNQFGVPVHLMSFDEENGDWK	Unambiguous	2	1	SPBC1735	M5(Oxidation)	HCD	1	0	1	1				1073	6.38183	0	0	0	175	3	1151.52	3452.54	2.70236	68.9283	16410	16410	MS2	19/112	120406QEx1_Gregan_Cipak_Sfr1-5A_try_10%.raw
	High	TEFTMSMFLNQFGVPVHLMSFDEENGDWK	Unambiguous	2	1	SPBC1735		HCD	1	0	1	1				1046	6.55749	0	0	26.8456	102	3	1146.18	3436.53	-0.61186	69.3247	16512	16512	MS2	17/112	120406QEx1_Gregan_Cipak_Sfr1-5A_try_10%.raw
	Low	TTPNAIK	Unconsidered	1	1	SPBC1735		HCD	1	0	1	1				51	1.62489	0	0	25.8706	69	2	372.716	744.425	-0.198782	19.7954	4532	4532	MS2	6/12	120406QEx1_Gregan_Cipak_Sfr1-5A_try_10%.raw
	Low	TTPNAIK	Unconsidered	1	1	SPBC1735		HCD	1	0	1	1				51	1.63385	0	0	7.38095	6	2	372.716	744.425	-0.0348031	20.1581	4611	4611	MS2	6/12	120406QEx1_Gregan_Cipak_Sfr1-5A_try_10%.raw
	Low	TTPNAIK	Unconsidered	1	1	SPBC1735		HCD	1	0	1	1				51	1.69977	0	0	35.2057	33	2	372.716	744.425	-0.0348031	20.5051	4686	4686	MS2	7/12	120406QEx1_Gregan_Cipak_Sfr1-5A_try_10%.raw
	Low	TTPNAIK	Unconsidered	1	1	SPBC1735		HCD	1	0	1	1				51	1.74204	0	0	38.1996	90	2	372.716	744.425	0.0471866	20.849	4758	4758	MS2	6/12	120406QEx1_Gregan_Cipak_Sfr1-5A_try_10%.raw
spectrum OK	Medium	TtPNAIKR	Unambiguous	1	1	SPBC1735	T2(Phospho)	HCD	1	0	1	1	0.99288	T(1): 0.7; T(2): 99.3	222.417	39	2.01804	0	1	7.48428	242	2	490.75	980.493	0.0285311	20.1834	4617	4617	MS2	8/20	120406QEx1_Gregan_Cipak_Sfr1-5A_try_10%.raw
	Medium	TtPNAIKR	Unambiguous	1	1	SPBC1735	T2(Phospho)	HCD	1	0	1	1	0.991442	T(1): 0.9; T(2): 99.1	197.219	39	2.10347	0	1	1.02115	239	2	490.75	980.493	0.15303	20.5476	4695	4695	MS2	8/20	120406QEx1_Gregan_Cipak_Sfr1-5A_try_10%.raw
	Low	TTPNAIKR	Unconsidered	1	1	SPBC1735		HCD	1	0	1	1				38	1.73644	0	1	59.8138	250	2	450.767	900.526	0.123723	16.7395	3810	3810	MS2	7/14	120406QEx1_Gregan_Cipak_Sfr1-5A_try_10%.raw
	Medium	TTPNAIKR	Unambiguous	1	1	SPBC1735		HCD	1	0	1	1				33	1.92541	0	1	0.548296	1	2	450.766	900.525	-0.825159	17.8223	4073	4073	MS2	7/14	120406QEx1_Gregan_Cipak_Sfr1-5A_try_10%.raw
	Medium	TTPNAIKR	Unambiguous	1	1	SPBC1735		HCD	1	0	1	1				33	1.92026	0	1	3.19679	4	2	450.767	900.526	-0.28294	18.1627	4160	4160	MS2	7/14	120406QEx1_Gregan_Cipak_Sfr1-5A_try_10%.raw
	Medium	TTPNAIKR	Unambiguous	1	1	SPBC1735		HCD	1	0	1	1				35	1.97535	0	1	1.04777	22	2	450.767	900.526	-0.418495	18.5038	4244	4244	MS2	7/14	120406QEx1_Gregan_Cipak_Sfr1-5A_try_10%.raw
	Low	TTPNAIKR	Unconsidered	1	1	SPBC1735		HCD	1	0	1	1				34	1.7412	0	1	13.0986	59	2	450.767	900.526	-0.350717	18.8462	4325	4325	MS2	7/14	120406QEx1_Gregan_Cipak_Sfr1-5A_try_10%.raw
	Low	TTPNAIKR	Unconsidered	1	1	SPBC1735		HCD	1	0	1	1				37	1.74079	0	1	8.38804	95	2	450.767	900.526	-0.350717	19.1913	4404	4404	MS2	7/14	120406QEx1_Gregan_Cipak_Sfr1-5A_try_10%.raw
	Medium	TTPNAIKR	Unambiguous	1	1	SPBC1735		HCD	1	0	1	1				38	1.96577	0	1	17.0448	155	2	450.767	900.526	-0.418495	19.8494	4545	4545	MS2	7/14	120406QEx1_Gregan_Cipak_Sfr1-5A_try_10%.raw
	Medium	TTPNAIKR	Unambiguous	1	1	SPBC1735		HCD	1	0	1	1				37	1.90207	0	1	0	250	2	450.767	900.526	0.327055	20.2001	4620	4620	MS2	7/14	120406QEx1_Gregan_Cipak_Sfr1-5A_try_10%.raw
	Low	TTPNAIKR	Unconsidered	1	1	SPBC1735		HCD	1	0	1	1				38	1.76509	0	1	25.4723	250	2	450.767	900.526	-0.215163	20.5563	4697	4697	MS2	9/14	120406QEx1_Gregan_Cipak_Sfr1-5A_try_10%.raw
	Medium	TTPNAIKR	Unambiguous	1	1	SPBC1735		HCD	1	0	1	1				37	2.02496	0	1	41.0884	250	2	450.767	900.526	0.0559459	21.1671	4825	4825	MS2	8/14	120406QEx1_Gregan_Cipak_Sfr1-5A_try_10%.raw
	Medium	TTPNAIKR	Unambiguous	1	1	SPBC1735		HCD	1	0	1	1				38	1.99112	0	1	71.4455	250	2	450.767	900.526	-0.147386	21.5488	4910	4910	MS2	8/14	120406QEx1_Gregan_Cipak_Sfr1-5A_try_10%.raw
	Medium	TTPNAIKR	Unambiguous	1	1	SPBC1735		HCD	1	0	1	1				37	1.97832	0	1	28.3798	250	2	450.767	900.526	-0.28294	21.9822	5006	5006	MS2	9/14	120406QEx1_Gregan_Cipak_Sfr1-5A_try_10%.raw
	High	VSLAESDLR	Unambiguous	1	1	SPBC1735		HCD	1	0	1	1				38	2.83279	0	0	3.3239	50	2	495.267	989.526	-0.20487	35.917	8367	8367	MS2	10/16	120406QEx1_Gregan_Cipak_Sfr1-5A_try_10%.raw
	High	VSLAESDLR	Unambiguous	1	1	SPBC1735		HCD	1	0	1	1				29	2.69199	0	0	0.62175	3	2	495.267	989.527	0.473622	36.2675	8452	8452	MS2	10/16	120406QEx1_Gregan_Cipak_Sfr1-5A_try_10%.raw
	High	VSLAESDLR	Unambiguous	1	1	SPBC1735		HCD	1	0	1	1				34	2.92593	0	0	12.0435	35	2	495.267	989.527	0.535304	36.6351	8552	8552	MS2	10/16	120406QEx1_Gregan_Cipak_Sfr1-5A_try_10%.raw
	High	VSLAESDLR	Unambiguous	1	1	SPBC1735		HCD	1	0	1	1				45	2.75481	0	0	0	132	2	495.266	989.525	-0.760002	37.0168	8647	8647	MS2	10/16	120406QEx1_Gregan_Cipak_Sfr1-5A_try_10%.raw
	High	VSLAESDLR	Unambiguous	1	1	SPBC1735		HCD	1	0	1	1				55	2.24653	0	0	70.6726	116	2	495.268	989.528	1.70724	37.5509	8791	8791	MS2	8/16	120406QEx1_Gregan_Cipak_Sfr1-5A_try_10%.raw
	High	VSLAESDLR	Unambiguous	1	1	SPBC1735		HCD	1	0	1	1				39	2.4704	0	0	31.1123	250	2	495.267	989.526	-0.0198269	37.9427	8899	8899	MS2	8/16	120406QEx1_Gregan_Cipak_Sfr1-5A_try_10%.raw
	Medium	VSLAESDLR	Unambiguous	1	1	SPBC1735		HCD	1	0	1	1				46	2.04859	0	0	37.295	250	2	495.266	989.525	-1.13009	39.1416	9209	9209	MS2	8/16	120406QEx1_Gregan_Cipak_Sfr1-5A_try_10%.raw
	High	WKNAAQQAAEVLFKPMAER	Unambiguous	2	1	SPBC1735		HCD	1	0	1	1				127	6.40752	0	1	0	71	4	547.789	2188.13	0.739032	51.1011	12308	12308	MS2	29/108	120406QEx1_Gregan_Cipak_Sfr1-5A_try_10%.raw
	High	WKNAAQQAAEVLFKPMAER	Unambiguous	2	1	SPBC1735		HCD	1	0	1	1				110	6.34305	0	1	0	53	3	730.048	2188.13	-2.0442	51.1296	12317	12317	MS2	27/72	120406QEx1_Gregan_Cipak_Sfr1-5A_try_10%.raw
	High	WKNAAQQAAEVLFKPMAER	Unambiguous	2	1	SPBC1735		HCD	1	0	1	1				129	4.78932	0	1	26.2176	250	4	547.789	2188.13	-0.0419916	51.5366	12423	12423	MS2	22/108	120406QEx1_Gregan_Cipak_Sfr1-5A_try_10%.raw

## Sheet: short list
	Confidence Level	Sequence	PSM Ambiguity	# Proteins	# Protein Groups	Protein Group Accessions	Modifications	Activation Type	ΔScore	ΔCn	Rank	Search Engine Rank	pRS Probability	pRS Site Probabilities	pRS Score	Peptides Matched	XCorr	Probability	# Missed Cleavages	Isolation Interference [%]	Ion Inject Time [ms]	Charge	m/z [Da]	MH+ [Da]	ΔM [ppm]	RT [min]	First Scan	Last Scan	MS Order	Ions Matched	Spectrum File
probably OK	Medium	ALtPDLR	Unambiguous	2	1	SPBC1735	T3(Phospho)	HCD	1	0	1	1	1	T(3): 100.0	222.624	37	2.10561	0	0	19.1362	163	2	433.213	865.418	-0.137571	40.5281	9576	9576	MS2	9/17	120406QEx1_Gregan_Cipak_Sfr1-5A_try_10%.raw
spectrum OK - S4/S8	High	cNNsGNHSDNLGFIEQSETVHPENEK	Unambiguous	2	1	SPBC1735	C1(Carbamidomethyl); S4(Phospho)	HCD	1	0	1	1	0.0121485	S(4): 1.2; S(8): 98.8; S(17): 0.0; T(19): 0.0	338.511	889	3.61082	0	0	2.24228	250	3	1012.75	3036.24	0.520219	41.3831	9798	9798	MS2	23/148	120406QEx1_Gregan_Cipak_Sfr1-5A_try_10%.raw
spectrum OK	High	LAGGVTQsFR	Unambiguous	2	1	SPBC1735	S8(Phospho)	HCD	1	0	1	1	0.999999	T(6): 0.0; S(8): 100.0	224.686	81	2.81481	0	0	28.4347	250	2	558.268	1115.53	4.07702	38.865	9133	9133	MS2	13/26	120406QEx1_Gregan_Cipak_Sfr1-5A_try_10%.raw
spectrum OK	High	QTASPQVADTNLKPSLAVTNLNsDETNTSSEPVTSPLR	Unambiguous	2	1	SPBC1735	S23(Phospho)	HCD	1	0	1	1	0.998935	T(2): 0.1; S(4): 0.0; T(10): 0.0; S(15): 0.0; T(19): 0.0; S(23): 99.9; T(26): 0.1; T(28): 0.0; S(29): 0.0; S(30): 0.0; T(34): 0.0; S(35): 0.0	312.249	1197	4.5861	0	0	1.84831	85	3	1354.99	4062.95	0.944269	52.1902	12591	12591	MS2	26/220	120406QEx1_Gregan_Cipak_Sfr1-5A_try_10%.raw
spectrum OK - T34/S35	High	QTASPQVADTNLKPSLAVTNLNSDETNTSSEPVTsPLR	Unambiguous	2	1	SPBC1735	S35(Phospho)	HCD	1	0	1	1	0.999539	T(2): 0.0; S(4): 0.0; T(10): 0.0; S(15): 0.0; T(19): 0.0; S(23): 0.0; T(26): 0.0; T(28): 0.0; S(29): 0.0; S(30): 0.0; T(34): 0.0; S(35): 100.0	448.563	905	5.11166	0	0	0	206	3	1354.99	4062.95	0.673866	57.7798	13919	13919	MS2	23/220	120406QEx1_Gregan_Cipak_Sfr1-5A_try_10%.raw
spectrum OK	High	sDPEITQLLSR	Unambiguous	2	1	SPBC1735	S1(Phospho)	HCD	1	0	1	1	1	S(1): 100.0; T(6): 0.0; S(10): 0.0	230.941	95	2.83384	0	0	34.9028	250	2	669.821	1338.64	3.6717	59.5073	14309	14309	MS2	13/40	120406QEx1_Gregan_Cipak_Sfr1-5A_try_10%.raw
spectrum OK	Medium	TtPNAIKR	Unambiguous	1	1	SPBC1735	T2(Phospho)	HCD	1	0	1	1	0.99288	T(1): 0.7; T(2): 99.3	222.417	39	2.01804	0	1	7.48428	242	2	490.75	980.493	0.0285311	20.1834	4617	4617	MS2	8/20	120406QEx1_Gregan_Cipak_Sfr1-5A_try_10%.raw

## Sheet: phosphosite probabilities
Position	Target	Modification	Classification	Highest PTM Score	Highest Peptide Confidence	Sequence Motif
52	S	Phospho	Post-translational	98.8	High	NNSGNHsDNLGFI	could be as well S48; not distinguishable in spectrum
73	T	Phospho	Post-translational	100	Middle	ENEKALtPDLRDT
135	S	Phospho	Post-translational	99.9	High	AVTNLNsDETNTS
147	S	Phospho	Post-translational	100	High	SSEPVTsPLRTTP	could be as well T146; not distinguishable in spectrum
152	T	Phospho	Post-translational	99.3	Middle	TSPLRTtPNAIKR
175	S	Phospho	Post-translational	100	High	NCLNPKsDPEITQ
253	S	Phospho	Post-translational	100	High	AGGVTQsFRIEEG

## Sheet: Swi5_tryp
	Same coverage with mild filter settings and high confidence settings

## Sheet: Swi5_chymo
	mild filter settings

## Sheet: identified proteins
Accession	Description	Score	Coverage	# Proteins	# Unique Peptides	# Peptides	# PSMs	# AAs	MW [kDa]	calc. pI
SPBC1735	Sfr1-5A mutant |S. pombe|	929.041	82.94	2	24	24	227	299	33.5373	7.40088
SPBC409.03	swi5 Swi5 protein|Schizosaccharomyces pombe|chr 2|||Manual	599.276	60	1	7	7	161	85	9.74201	6.15088
SPCC1739.13	ssa2 heat shock protein Ssa2 |Schizosaccharomyces pombe|chr 3|||Manual	421.424	71.1	1	22	39	111	647	70.1897	5.24951
SPAC13G7.02c	ssa1 heat shock protein Ssa1 |Schizosaccharomyces pombe|chr 1|||Manual	280.833	56.06	1	16	33	75	644	70.0997	5.24951
SPAPB8E5.06c	rpl302 rpl3-2, rpl3-b|60S ribosomal protein L3|Schizosaccharomyces pombe|chr 1|||Manual	273.059	56.19	2	26	26	66	388	43.7893	10.272
SPAC22A12.15c	bip1 bip|ER heat shock protein BiP|Schizosaccharomyces pombe|chr 1|||Manual	209.987	42.99	1	30	31	55	663	73.1816	4.95752
SPBP8B7.03c	rpl402 rpl4-2, rpl4|60S ribosomal protein L4 |Schizosaccharomyces pombe|chr 2|||Manual	220.925	56.47	1	5	19	53	363	39.7427	10.7847
SPBC32F12.11	tdh1 gpd1|glyceraldehyde-3-phosphate dehydrogenase Tdh1|Schizosaccharomyces pombe|chr 2|||Manual	215.901	60.12	1	10	17	50	336	35.8473	6.69775
SPAC664.11	ssc1 ssp1|mitochondrial heat shock protein Hsp70|Schizosaccharomyces pombe|chr 1|||Manual	200.455	49.41	1	33	33	50	674	72.9319	7.1665
SPAC1F7.13c	rpl801 rpl8-1, rpl18, rpk5a, rpl2-1, SPAC21E11.02c|60S ribosomal protein L8 |Schizosaccharomyces pombe|chr 1|||Manual	213.682	57.71	1	12	12	49	253	27.0834	10.8579
SPBC354.12	gpd3 glyceraldehyde 3-phosphate dehydrogenase Gpd3|Schizosaccharomyces pombe|chr 2|||Manual	189.245	52.54	1	8	15	44	335	35.6523	7.88428
SPBC1711.06	rpl401 rpl4-1, rpl4|60S ribosomal protein L4 |Schizosaccharomyces pombe|chr 2|||Manual	178.128	52.07	1	5	18	43	363	39.8858	10.7114
SPBC21B10.10	rps402 rps4-2|40S ribosomal protein S4 |Schizosaccharomyces pombe|chr 2|||Manual	127.258	54.2	1	2	14	36	262	29.6402	10.2427
SPBC18H10.12c	rpl701 60S ribosomal protein L7|Schizosaccharomyces pombe|chr 2|||Manual	125.149	56.18	1	12	17	35	251	28.7126	9.96436
SPBC29A3.04	rpl8 60S ribosomal protein L7a/L8 |Schizosaccharomyces pombe|chr 2|||Manual	114.621	59.07	1	18	18	34	259	28.589	10.3452
SPAC664.05	rpl13 60S ribosomal protein L13 |Schizosaccharomyces pombe|chr 1|||Manual	147.511	58.65	1	13	13	34	208	23.5147	10.6968
SPAC23A1.10	tef102 ef1a-b|translation elongation factor EF-1 alpha Ef1a-b|Schizosaccharomyces pombe|chr 1|||Manual	135.287	43.26	2	16	16	34	460	49.6429	8.99756
SPCC1183.08c	rpl101 rpl1-1, rpl10a-1|60S ribosomal protein L10a|Schizosaccharomyces pombe|chr 3|||Manual	146.992	49.54	1	6	11	34	216	23.9021	9.81787
SPAC959.07	rps403 rps4-3, rps4|40S ribosomal protein S4 |Schizosaccharomyces pombe|chr 1|||Manual	117.437	54.2	1	2	14	33	262	29.6562	10.2573
SPAC6F6.07c	rps13 40S ribosomal protein S13 |Schizosaccharomyces pombe|chr 1|||Manual	104.007	49.67	1	10	10	32	151	16.9423	10.3745
SPAC13G6.07c	rps601 rps6-1|40S ribosomal protein S6|Schizosaccharomyces pombe|chr 1|||Manual	124.598	39.75	2	11	11	31	239	27.4822	10.8286
SPBC56F2.02	rpl1901 rpl19-1|60S ribosomal protein L19|Schizosaccharomyces pombe|chr 2|||Manual	109.751	40.93	1	1	12	31	193	22.7096	11.3999
SPBC32H8.12c	act1 cps8|actin Act1|Schizosaccharomyces pombe|chr 2|||Manual	140.153	56	1	16	16	31	375	41.7379	5.47803
SPAC1071.10c	pma1 P-type proton ATPase, P3-type Pma1|Schizosaccharomyces pombe|chr 1|||Manual	124.795	32.64	2	22	22	30	919	99.8204	5.18604
SPCC576.11	rpl15 60S ribosomal protein L15 |Schizosaccharomyces pombe|chr 3|||Manual	110.743	47.76	1	1	10	30	201	23.7918	11.2534
SPBC1709.05	sks2 hsc1|heat shock protein, ribosome associated molecular chaperone Sks2|Schizosaccharomyces pombe|chr 2|||Manual	122.032	44.21	1	21	21	29	613	67.1639	6.0874
SPAC1F8.07c	pyruvate decarboxylase |Schizosaccharomyces pombe|chr 1|||Manual	105.386	43.49	1	16	16	28	568	61.5081	5.5542
SPAC22H12.04c	rps102 rps1-2, rps3a-2|40S ribosomal protein S3a |Schizosaccharomyces pombe|chr 1|||Manual	104.463	50	1	10	15	27	252	28.5036	10.1401
SPAC1783.08c	rpl1502 rpl15-2|60S ribosomal protein L15b |Schizosaccharomyces pombe|chr 1|||Manual	100.015	47.76	1	1	10	27	201	23.8078	11.1802
SPCC622.18	rpl6 60S ribosomal protein L6 |Schizosaccharomyces pombe|chr 3|||Manual	112.18	58.46	1	12	12	27	195	21.2346	10.2573
SPAC926.04c	hsp90 swo1, git10|Hsp90 chaperone|Schizosaccharomyces pombe|chr 1|||Manual	90.8859	35.09	1	22	22	26	704	80.5461	4.95752
SPBC685.07c	rpl2701 rpl27-1|60S ribosomal protein L27|Schizosaccharomyces pombe|chr 2|||Manual	91.0317	52.21	1	5	9	26	136	15.3796	10.8433
SPAC3A12.10	rpl2001 rpl20-1, rpl20, yl17b, rpl18a-2|60S ribosomal protein L20a |Schizosaccharomyces pombe|chr 1|||Manual	91.6621	56.82	1	12	12	26	176	20.5862	10.4185
SPCC576.08c	rps2 40S ribosomal protein S2 |Schizosaccharomyces pombe|chr 3|||Manual	93.1907	38.34	1	10	10	25	253	27.6198	10.0815
SPAC3H5.07	rpl702 rpl7-2, rpl7, rpl7b|60S ribosomal protein L7|Schizosaccharomyces pombe|chr 1|||Manual	89.822	50	1	11	16	25	250	28.4316	10.0669
SPBC16D10.11c	rps1801 rps18-1|40S ribosomal protein S18 |Schizosaccharomyces pombe|chr 2|||Manual	78.0779	59.87	1	13	13	25	152	17.4245	10.4917
SPBC29A3.12	rps902 rps9-2, rps9b|40S ribosomal protein S9 |Schizosaccharomyces pombe|chr 2|||Manual	82.0325	55.21	1	4	13	24	192	22.2312	10.3745
SPAC3H5.12c	rpl501 rpl5-1, rpl5|60S ribosomal protein L5 |Schizosaccharomyces pombe|chr 1|||Manual	118.955	50.68	2	13	13	24	294	33.4391	9.0708
SPAC2C4.16c	rps801 rps8-1, rps8|40S ribosomal protein S8 |Schizosaccharomyces pombe|chr 1|||Manual	93.7737	55.5	2	10	10	24	200	22.579	10.9312
SPBC16G5.14c	rps3 40S ribosomal protein S3 |Schizosaccharomyces pombe|chr 2|||Manual	91.2212	51.41	1	11	11	23	249	27.5356	9.20264
SPCC5E4.07	rpl2802 rpl28-2, rpl28|60S ribosomal protein L27/L28|Schizosaccharomyces pombe|chr 3|||Manual	78.104	63.51	1	3	10	22	148	16.6431	11.063
SPBC30D10.18c	rpl102 rpl1-2, rpl10a-2|60S ribosomal protein L10a|Schizosaccharomyces pombe|chr 2|||Manual	87.1571	33.8	1	3	8	22	216	23.8691	9.78857
SPAC4A8.11c	fas2 lsd1|fatty acid synthase alpha subunit Lsd1|Schizosaccharomyces pombe|chr 1|||Manual	79.0955	16.83	1	21	21	22	1842	202.043	6.17627
SPBC1921.01c	rpl35b rpl37-1, rpl37|60S ribosomal protein L35a |Schizosaccharomyces pombe|chr 2|||Manual	70.1934	50	1	2	6	21	108	12.1795	10.6821
SPBC106.18	rpl2501 rpl25a|60S ribosomal protein L25 |Schizosaccharomyces pombe|chr 2|||Manual	80.6693	52.48	1	2	8	21	141	15.8259	10.4771
SPAC926.09c	fas1 fatty acid synthase beta subunit Fas1|Schizosaccharomyces pombe|chr 1|||Manual	70.8848	14.66	1	20	20	20	2073	230.416	6.37939
SPAC24H6.07	rps901 rps9-1, rps9a|40S ribosomal protein S9|Schizosaccharomyces pombe|chr 1|||Manual	68.8345	54.45	1	2	11	20	191	22.1472	10.3745
SPCC1682.14	rpl1902 rpl19-2|60S ribosomal protein L19|Schizosaccharomyces pombe|chr 3|||Manual	74.8417	34.2	1	1	8	20	193	22.7396	11.3999
SPBC776.11	rpl2801 rpl28-1|60S ribosomal protein L27/L28|Schizosaccharomyces pombe|chr 2|||Manual	71.8078	63.51	1	3	10	20	148	16.6751	11.063
SPBC4F6.04	rpl2502 rpl25b, rpl23a-2|60S ribosomal protein L25 |Schizosaccharomyces pombe|chr 2|||Manual	77.3124	52.48	1	2	8	20	141	15.7578	10.4771
SPCC1795.11	sum3 ded1, slh3, moc2|translation initiation RNA helicase Sum3|Schizosaccharomyces pombe|chr 3|||Manual	74.8564	41.35	1	18	19	20	636	69.7158	8.49951
SPCC74.05	rpl2702 rpl27-2|60S ribosomal protein L27 |Schizosaccharomyces pombe|chr 3|||Manual	66.2307	52.21	1	4	8	19	136	15.2955	10.7261
SPAC13G6.02c	rps101 rps1-1, rps3a-1|40S ribosomal protein S3a|Schizosaccharomyces pombe|chr 1|||Manual	65.9773	47.22	1	6	11	18	252	28.4704	9.99365
SPCC613.05c	rpl35 60S ribosomal protein L35|Schizosaccharomyces pombe|chr 3|||Manual	63.9545	46.72	1	8	8	18	122	14.2931	10.7114
SPBC1815.01	eno101 eno1|enolase |Schizosaccharomyces pombe|chr 2|||Manual	75.2374	42.37	1	13	13	18	439	47.4064	6.66846
SPAC1687.06c	rpl44 rpl28|60S ribosomal protein L28/L44 |Schizosaccharomyces pombe|chr 1|||Manual	58.1439	50	1	8	8	17	134	14.746	11.2241
SPAC144.11	rps1102 rps11-2, rps11|40S ribosomal protein S11 |Schizosaccharomyces pombe|chr 1|||Manual	63.6694	52.63	1	9	9	17	152	17.4894	10.3745
SPAC18G6.14c	rps7 40S ribosomal protein S7 |Schizosaccharomyces pombe|chr 1|||Manual	65.4173	52.31	1	8	8	17	195	21.9339	10.1401
SPBC18E5.04	rpl1001 rpl10-1, rpl10|60S ribosomal protein L10|Schizosaccharomyces pombe|chr 2|||Manual	49.8083	34.39	1	1	11	17	221	25.3573	10.0522
SPBC29B5.03c	rpl26 60S ribosomal protein L26 |Schizosaccharomyces pombe|chr 2|||Manual	51.9308	41.27	1	8	8	17	126	14.3321	11.1655
SPAPB17E12.13	rpl1802 rpl18-2|60S ribosomal protein L18 |Schizosaccharomyces pombe|chr 1|||Manual	51.8306	47.06	1	3	9	16	187	21.171	11.6343
SPAC328.10c	rps502 rps5-2|40S ribosomal protein S5 |Schizosaccharomyces pombe|chr 1|||Manual	61.2905	50.74	2	10	10	16	203	22.343	9.84717
SPAC589.10c	ribomal-ubiquitin fusion protein Ubi5 |Schizosaccharomyces pombe|chr 1|||Manual	53.181	44.67	4	8	8	16	150	17.2043	9.75928
SPAC17G6.06	rps2401 rps24-1, rps24|40S ribosomal protein S24 |Schizosaccharomyces pombe|chr 1|||Manual	56.5548	41.04	1	4	7	16	134	15.4604	10.9312
SPBC16H5.02	pfk1 6-phosphofructokinase |Schizosaccharomyces pombe|chr 2|||Manual	57.746	23.89	1	16	16	16	942	102.491	6.18896
SPAC4H3.01	DNAJ domain protein Caj1/Djp1 type |Schizosaccharomyces pombe|chr 1|||Manual	51.2341	40.31	1	14	14	15	392	44.741	6.49365
SPAP7G5.05	rpl1002 rpl10-2, rpl10|60S ribosomal protein L10|Schizosaccharomyces pombe|chr 1|||Manual	44.1291	34.39	1	1	11	15	221	25.3433	10.0522
SPCC24B10.09	rps1702 rps17-2, rps17|40S ribosomal protein S17 |Schizosaccharomyces pombe|chr 3|||Manual	56.3739	57.58	1	5	9	15	132	15.5244	10.1255
SPAC664.04c	rps1602 rps16-2, rps16|40S ribosomal protein S16 |Schizosaccharomyces pombe|chr 1|||Manual	54.0495	60	1	9	9	15	140	15.3854	10.1255
SPAC26A3.07c	rpl1101 rpl11-1, rpl11|60S ribosomal protein L11 |Schizosaccharomyces pombe|chr 1|||Manual	51.3399	44.25	1	6	6	15	174	19.8786	10.0669
SPBC839.05c	rps1701 rps17-1|40S ribosomal protein S17 |Schizosaccharomyces pombe|chr 2|||Manual	57.3374	55.73	1	6	10	15	131	15.5044	10.3013
SPCC330.14c	rpl2402 rpl24-2|60S ribosomal protein L24 |Schizosaccharomyces pombe|chr 3|||Manual	41.4175	38.93	2	9	9	14	149	16.9014	11.6489
SPAC22A12.04c	rps2201 rps22-1, rps15a-1|40S ribosomal protein S15a |Schizosaccharomyces pombe|chr 1|||Manual	50.5572	59.23	1	8	8	14	130	14.751	10.272
SPAC3G9.11c	pyruvate decarboxylase |Schizosaccharomyces pombe|chr 1|||Manual	58.5801	33.86	1	12	12	14	570	62.6142	5.70654
SPAC32A11.04c	tif212 tif22, SPAC6B12.17c|translation initiation factor eIF2 beta subunit |Schizosaccharomyces pombe|chr 1|||Manual	46.8487	37.69	1	12	12	14	321	35.9382	8.27979
SPBC16A3.08c	Stm1 homolog |Schizosaccharomyces pombe|chr 2|||Manual	50.0583	34.15	1	10	10	14	284	30.931	10.1401
SPAC1805.13	rpl14 60S ribosomal protein L14 |Schizosaccharomyces pombe|chr 1|||Manual	46.2307	46.27	1	8	8	14	134	15.2004	10.3452
SPBC646.10c	U3 snoRNP protein Nop56 |Schizosaccharomyces pombe|chr 2|||Manual	49.102	31.39	1	13	13	14	497	55.354	8.89502
SPCC1393.03	rps1501 rps15-1|40S ribosomal protein S15 |Schizosaccharomyces pombe|chr 3|||Manual	55.6404	30.72	1	2	4	14	153	17.5085	10.3892
SPCC364.03	rpl1702 rpl17-2, rpl17|60S ribosomal protein L17 |Schizosaccharomyces pombe|chr 3|||Manual	52.7866	45.45	1	3	7	14	187	20.8141	10.3306
SPBC17G9.07	rps2402 rps24-2|40S ribosomal protein S24 |Schizosaccharomyces pombe|chr 2|||Manual	48.686	41.04	1	4	7	14	134	15.5294	10.9165
SPBC11C11.07	rpl1801 rpl18-1, rpl18|60S ribosomal protein L18|Schizosaccharomyces pombe|chr 2|||Manual	44.857	37.43	1	1	7	14	187	21.1769	11.6636
SPCC18.14c	rpp0 60S acidic ribosomal protein Rpp0 |Schizosaccharomyces pombe|chr 3|||Manual	55.6011	36.86	1	7	7	13	312	33.5441	4.76709
SPBP8B7.16c	dbp2 ATP-dependent RNA helicase Dbp2|Schizosaccharomyces pombe|chr 2|||Manual	43.2658	26.55	1	11	12	13	550	61.5101	9.20264
SPBC2F12.04	rpl1701 rpl17, rpl17-1|60S ribosomal protein L17|Schizosaccharomyces pombe|chr 2|||Manual	50.6814	40.11	1	2	6	13	187	20.8012	10.3599
SPCC13B11.01	adh1 adh|alcohol dehydrogenase Adh1|Schizosaccharomyces pombe|chr 3|||Manual	46.2229	34.57	1	9	9	12	350	37.372	6.93213
SPBC16C6.11	rpl3201 rpl32-1|60S ribosomal protein L32|Schizosaccharomyces pombe|chr 2|||Manual	37.3079	32.28	1	2	5	12	127	14.4359	11.0483
SPAC1071.07c	rps1502 rps15-2, rps15|40S ribosomal protein S15 |Schizosaccharomyces pombe|chr 1|||Manual	47.1858	30.52	1	2	4	12	154	17.6225	10.3892
SPAC890.08	rpl31 60S ribosomal protein L31 |Schizosaccharomyces pombe|chr 1|||Manual	47.1081	42.48	1	7	7	12	113	13.2531	10.2427
SPBC2D10.10c	fib1 fib|fibrillarin|Schizosaccharomyces pombe|chr 2|||Manual	42.6682	38.69	1	9	9	11	305	32.0208	10.1694
SPAC3H5.10	rpl3202 rpl32-2, rpl32|60S ribosomal protein L32 |Schizosaccharomyces pombe|chr 1|||Manual	37.5455	26.77	1	1	4	11	127	14.4489	11.1802
SPAC29A4.04c	cbf5 pseudouridylate synthase Cbf5 |Schizosaccharomyces pombe|chr 1|||Manual	43.8081	32.7	1	9	9	11	474	53.0769	8.96826
SPAC17A2.13c	rad25 14-3-3 protein Rad25|Schizosaccharomyces pombe|chr 1|||Manual	40.2655	45.19	1	8	9	11	270	30.35	4.84326
SPAC3H5.05c	rps1401 rps14-1, rps14|40S ribosomal protein S14 |Schizosaccharomyces pombe|chr 1|||Manual	45.8449	40.29	1	6	6	11	139	14.6898	10.6675
SPAC24C9.12c	glycine hydroxymethyltransferase |Schizosaccharomyces pombe|chr 1|||Manual	37.6378	32.33	1	11	11	11	467	51.8282	7.81104
SPCC970.05	rpl3601 rpl36-1|60S ribosomal protein L36|Schizosaccharomyces pombe|chr 3|||Manual	35.0064	46.46	2	2	6	11	99	11.2565	11.8394
SPAC23A1.11	rpl1602 rpl16-2|60S ribosomal protein L13/L16 |Schizosaccharomyces pombe|chr 1|||Manual	46.9989	28.43	3	5	5	11	197	21.9912	10.5503
SPBC1734.11	mas5 DNAJ domain protein Mas5 |Schizosaccharomyces pombe|chr 2|||Manual	44.7636	23.1	1	9	9	11	407	44.7925	6.59521
SPBC530.10c	anc1 mitochondrial adenine nucleotide carrier Anc1|Schizosaccharomyces pombe|chr 2|||Manual	29.9974	25.78	1	8	8	10	322	34.9981	9.96436
SPBC83.08	rvb2 AAA family ATPase Rvb2|Schizosaccharomyces pombe|chr 2|||Manual	36.1471	29.03	1	10	10	10	465	51.5295	5.38916
SPBC405.07	rpl3602 rpl36-2, rpl36|60S ribosomal protein L36|Schizosaccharomyces pombe|chr 2|||Manual	32.6857	37.37	1	1	5	10	99	11.2515	11.8394
SPBC26H8.07c	nda3 ben1, alp12|tubulin beta Nda3|Schizosaccharomyces pombe|chr 2|||Manual	37.8695	28.13	1	9	9	10	448	49.44	4.85596
SPAC25G10.08	translation initiation factor eIF3b |Schizosaccharomyces pombe|chr 1|||Manual	37.4586	19.17	1	10	10	10	725	83.9826	5.49072
SPCP1E11.11	puf6 Puf family RNA-binding protein Puf6 |Schizosaccharomyces pombe|chr 3|||Manual	30.6474	16.82	1	10	10	10	642	72.589	8.86572
SPBP22H7.08	rps1002 rps10-2, rps10B|40S ribosomal protein S10 |Schizosaccharomyces pombe|chr 2|||Manual	43.7581	46.26	1	5	7	10	147	16.4326	9.93506
SPBC19C2.07	fba1 fructose-bisphosphate aldolase Fba1|Schizosaccharomyces pombe|chr 2|||Manual	48.8885	38.55	1	7	7	10	358	39.5449	6.354
SPCC16C4.13c	rpl1201 rpl12-1, rpl12.1|60S ribosomal protein L12.1/L12A|Schizosaccharomyces pombe|chr 3|||Manual	48.871	47.88	1	6	6	10	165	17.6555	9.30518
SPBC17G9.09	tif213 translation initiation factor eIF2 gamma subunit |Schizosaccharomyces pombe|chr 2|||Manual	37.2155	23.77	1	8	8	10	446	48.7499	8.39697
SPAC9G1.03c	rpl3001 rpl30-1, rpl30|60S ribosomal protein L30 |Schizosaccharomyces pombe|chr 1|||Manual	45.6212	44.04	1	4	4	10	109	11.5842	9.67139
SPCC417.08	tef3 translation elongation factor eEF3|Schizosaccharomyces pombe|chr 3|||Manual	32.1524	11.84	1	9	9	10	1047	115.729	6.49365
SPAC4H3.10c	pyk1 pyruvate kinase |Schizosaccharomyces pombe|chr 1|||Manual	35.8488	30.84	1	10	10	10	509	55.4795	7.95752
SPAC31G5.17c	rps1001 rps10-1|40S ribosomal protein S10 |Schizosaccharomyces pombe|chr 1|||Manual	45.9115	40.97	1	4	6	10	144	16.2655	9.93506
SPBC660.11	tcg1 mug187|single-stranded telomeric binding protein Tgc1|Schizosaccharomyces pombe|chr 2|||Manual	38.8254	37.25	1	9	9	10	349	37.9802	5.61768
SPBC660.16	phosphogluconate dehydrogenase, decarboxylating|Schizosaccharomyces pombe|chr 2|||Manual	33.4747	20.53	1	8	8	9	492	53.6453	7.13721
SPBC365.03c	rpl2101 rpl21, rpl21-1|60S ribosomal protein L21 |Schizosaccharomyces pombe|chr 2|||Manual	38.8773	40.63	1	2	5	9	160	18.3687	10.1841
SPAC17H9.05	ebp2 rRNA processing protein Ebp2 |Schizosaccharomyces pombe|chr 1|||Manual	38.8982	23.72	1	7	7	9	333	37.7959	9.45166
SPCC663.04	rpl39 60S ribosomal protein L39|Schizosaccharomyces pombe|chr 3|||Manual	28.7059	39.22	1	2	2	9	51	6.3045	12.5425
SPAC110.04c	pss1 ssp1, SPAP14E8.01c|heat shock protein Pss1|Schizosaccharomyces pombe|chr 1|||Manual	29.2579	15.28	1	9	9	9	720	80.3255	5.07178
SPCC1620.04c	mug55 Cdc20/Fizzy subfamily WD repeat protein|Schizosaccharomyces pombe|chr 3|||Manual	30.3684	18.86	1	7	7	9	509	58.3725	8.45557
SPAC1805.11c	rps2602 rps26-2|40S ribosomal protein S26 |Schizosaccharomyces pombe|chr 1|||Manual	22.9674	27.73	1	2	3	8	119	13.8535	11.2534
SPBP8B7.06	rpp201 rpp2, rpp2-1|60S acidic ribosomal protein P2A subunit |Schizosaccharomyces pombe|chr 2|||Manual	33.5141	70	1	3	4	8	110	11.1514	4.04346
SPAC6B12.12	tom70 mitochondrial TOM complex subunit Tom70 |Schizosaccharomyces pombe|chr 1|||Manual	29.6153	16	1	7	7	8	625	69.4732	8.04541
SPAC1420.02c	cct5 chaperonin-containing T-complex epsilon subunit Cct5|Schizosaccharomyces pombe|chr 1|||Manual	28.9805	21.06	1	8	8	8	546	59.3402	6.25244
SPAC959.08	rpl2102 rpl21-2, rpl21|60S ribosomal protein L21 |Schizosaccharomyces pombe|chr 1|||Manual	42.3634	40.63	1	2	5	8	160	18.3417	10.1694
SPAC513.01c	eft201 eft2-1, etf2, SPAPYUK71.04c|translation elongation factor 2 |Schizosaccharomyces pombe|chr 1|||Manual	24.5564	11.88	2	8	8	8	842	93.1716	6.43018
SPAC8E11.02c	rad24 14-3-3 protein Rad24|Schizosaccharomyces pombe|chr 1|||Manual	24.1832	29.26	1	6	7	8	270	30.0639	4.71631
SPBC800.04c	rpl4301 rpl43-1, rpl43, rpl37a-1|60S ribosomal protein L37a |Schizosaccharomyces pombe|chr 2|||Manual	31.8469	29.79	1	2	4	8	94	10.4155	10.7847
SPBC17D11.05	tif32 translation initiation factor eIF3a|Schizosaccharomyces pombe|chr 2|||Manual	21.7117	9.66	1	8	8	8	932	107.005	8.86572
SPBC29A10.02	spo5 mrb1, mug12, SPBC365.18|meiotic RNA-binding protein 1|Schizosaccharomyces pombe|chr 2|||Manual	27.5371	14.81	1	6	6	8	567	62.9059	9.01221
SPBC713.02c	ubp15 ubpD, ubp21|ubiquitin C-terminal hydrolase Ubp15|Schizosaccharomyces pombe|chr 2|||Manual	30.9872	11.07	1	8	8	8	1129	130.75	5.50342
SPBC19F5.05c	ppp1 SPBC25D12.01c|pescadillo-family BRCT domain protein |Schizosaccharomyces pombe|chr 2|||Manual	25.0458	15.49	1	8	8	8	607	69.1464	7.13721
SPBC1347.05c	DNAJ domain protein Scj1 |Schizosaccharomyces pombe|chr 2|||Manual	23.1895	20.35	1	7	7	8	398	44.2591	7.86963
SPBC16H5.12c	SPNGAF91 conserved fungal protein|Schizosaccharomyces pombe|chr 2|||Manual	26.4287	13.57	1	8	8	8	737	82.4695	5.75732
SPAC926.08c	Brix domain protein Rpf2 |Schizosaccharomyces pombe|chr 1|||Manual	28.6206	28.71	1	6	6	7	317	36.0491	8.96826
SPCC1322.11	rpl2302 rpl23-2|60S ribosomal protein L23|Schizosaccharomyces pombe|chr 3|||Manual	25.1904	46.76	1	5	5	7	139	14.8729	10.2134
SPBC12D12.03	cct1 chaperonin-containing T-complex alpha subunit Cct1|Schizosaccharomyces pombe|chr 2|||Manual	20.2404	13.67	1	7	7	7	556	60.0096	6.75635
SPAC11E3.15	rpl22 SPAP8A3.01|60S ribosomal protein L22 |Schizosaccharomyces pombe|chr 1|||Manual	21.5438	47.86	1	5	5	7	117	13.3122	9.64209
SPAC32A11.02c	conserved fungal protein|Schizosaccharomyces pombe|chr 1|||Manual	21.8389	10.58	1	7	7	7	851	97.0192	9.02686
SPBP8B7.20c	RNA methyltransferase Nop2 |Schizosaccharomyces pombe|chr 2|||Manual	21.3961	12.83	1	7	7	7	608	68.8926	5.13525
SPAC8E11.03c	dmc1 dmp1|RecA family ATPase Dmc1|Schizosaccharomyces pombe|chr 1|||Manual	22.8775	18.67	1	5	5	7	332	36.3851	5.60498
SPBC1D7.04	mlo3 RNA binding protein Mlo3|Schizosaccharomyces pombe|chr 2|||Manual	22.7854	34.17	1	6	6	7	199	21.7776	10.2134
SPCC1827.03c	acetyl-CoA ligase |Schizosaccharomyces pombe|chr 3|||Manual	22.7713	15.43	1	7	7	7	512	56.2386	9.29053
SPBC18H10.03	tif35 translation initiation factor eIF3g|Schizosaccharomyces pombe|chr 2|||Manual	22.4404	23.76	1	6	6	7	282	31.475	9.14404
SPCP31B10.08c	rpl35a rpl33|60S ribosomal protein L35a|Schizosaccharomyces pombe|chr 3|||Manual	25.3458	37.96	1	2	4	7	108	12.1005	10.5503
SPCC1183.07	U3 snoRNP-associated protein Rrp5 |Schizosaccharomyces pombe|chr 3|||Manual	18.0709	5.09	1	7	7	7	1690	187.407	5.49072
SPAC1527.03	RNA-binding protein |Schizosaccharomyces pombe|chr 1|||Manual	21.6938	16.63	1	5	5	7	475	53.2004	9.0415
SPAP27G11.13c	nop10 snoRNP pseudouridylase box H/ACA snoRNP complex protein |Schizosaccharomyces pombe|chr 1|||Manual	23.6863	54.69	1	4	4	7	64	7.65306	10.1108
SPBC651.01c	nog1 SPBC725.18c|GTP binding protein Nog1 |Schizosaccharomyces pombe|chr 2|||Manual	24.5557	16.04	1	7	7	7	642	72.7541	9.23193
SPAC9E9.09c	aldehyde dehydrogenase |Schizosaccharomyces pombe|chr 1|||Manual	25.0182	17.89	1	6	6	7	503	54.7336	6.7417
SPBC337.05c	cct8 chaperonin-containing T-complex theta subunit Cct8|Schizosaccharomyces pombe|chr 2|||Manual	21.2253	14.29	1	7	7	7	546	59.9182	5.31299
SPAC6G10.08	idp1 isocitrate dehydrogenase Idp1 |Schizosaccharomyces pombe|chr 1|||Manual	27.6092	18.45	1	6	6	7	439	49.4472	8.98291
SPAC6B12.15	cpc2 rkp1|RACK1 ortholog Cpc2|Schizosaccharomyces pombe|chr 1|||Manual	20.7532	25.16	1	6	6	6	314	34.8292	5.75732
SPBC23G7.15c	rpp202 rpp2-2|60S acidic ribosomal protein P2B subunit|Schizosaccharomyces pombe|chr 2|||Manual	20.5683	53.64	1	3	4	6	110	11.1134	4.00537
SPBC9B6.08	clc1 clathrin light chain|Schizosaccharomyces pombe|chr 2|||Manual	21.8717	25.76	1	4	4	6	229	25.8476	4.71631
SPCC576.09	rps20 40S ribosomal protein S20 |Schizosaccharomyces pombe|chr 3|||Manual	20.2529	41.53	1	4	4	6	118	13.5354	10.0522
SPBC3D6.15	rps2501 rps25-1|40S ribosomal protein S25 |Schizosaccharomyces pombe|chr 2|||Manual	18.7639	31.82	2	4	4	6	88	9.81346	10.3745
SPAPB8E5.09	rvb1 AAA family ATPase Rvb1|Schizosaccharomyces pombe|chr 1|||Manual	23.0339	18.86	1	6	6	6	456	50.0211	5.79541
SPBP4H10.13	rps2302 rps23-2|40S ribosomal protein S23 |Schizosaccharomyces pombe|chr 2|||Manual	22.5046	41.96	1	4	4	6	143	15.6456	10.3159
SPBC83.02c	rpl4302 rpl43-2, rpl43, rpl37a-2|60S ribosomal protein L37a |Schizosaccharomyces pombe|chr 2|||Manual	19.8055	28.72	1	1	3	6	94	10.3735	11.0044
SPAC1071.08	rpp203 rpp2-3, rla6|60S acidic ribosomal protein P2C subunit|Schizosaccharomyces pombe|chr 1|||Manual	23.5848	48.18	1	2	3	6	110	11.1075	4.11963
SPAC806.03c	rps2601 rps26-1, rps26|40S ribosomal protein S26 |Schizosaccharomyces pombe|chr 1|||Manual	15.202	27.5	1	2	3	6	120	13.8675	11.2241
SPCC613.06	rpl902 rpl9-2|60S ribosomal protein L9|Schizosaccharomyces pombe|chr 3|||Manual	23.9942	25.4	1	3	5	6	189	21.3685	9.5835
SPBC14C8.16c	bot1 mitochondrial ribosomal protein subunit S35|Schizosaccharomyces pombe|chr 2|||Manual	19.6573	24.76	1	6	6	6	315	35.7302	9.5542
SPAC4A8.16c	tif33 SPAC823.01c|translation initiation factor eIF3c|Schizosaccharomyces pombe|chr 1|||Manual	19.0019	8.5	1	6	6	6	918	104.303	4.94482
SPAC56E4.04c	cut6 acetyl-CoA/biotin carboxylase|Schizosaccharomyces pombe|chr 1|||Manual	19.7552	4.12	1	6	6	6	2280	256.682	6.44287
SPCC576.10c	rpt3 19S proteasome regulatory subunit Rpt3 |Schizosaccharomyces pombe|chr 3|||Manual	16.7944	15.68	2	4	5	5	389	43.5258	5.41455
SPAC4D7.05	sum1 tif34|translation initiation factor eIF3i|Schizosaccharomyces pombe|chr 1|||Manual	13.892	19.21	1	5	5	5	328	36.7883	6.1001
SPBC3B9.14c	mrpl3 mitochondrial ribosomal protein subunit L3 |Schizosaccharomyces pombe|chr 2|||Manual	15.1594	17.18	1	5	5	5	326	37.1717	9.74463
SPAC23G3.06	U3 snoRNP protein Nop58 |Schizosaccharomyces pombe|chr 1|||Manual	20.2369	15.35	1	5	5	5	508	55.7246	9.05615
SPBC800.06	brx1 ribosome biogenesis protein Brx1 |Schizosaccharomyces pombe|chr 2|||Manual	20.2365	21.02	1	4	4	5	295	33.8786	9.21729
SPBC1A4.08c	cct3 chaperonin-containing T-complex gamma subunit Cct3|Schizosaccharomyces pombe|chr 2|||Manual	18.6273	11.93	1	5	5	5	528	58.4435	7.25439
SPBC1A4.03c	top2 ptr11|DNA topoisomerase II|Schizosaccharomyces pombe|chr 2|||Manual	12.6327	3.7	1	5	5	5	1485	167.788	7.28369
SPAC1D4.04	cct2 chaperonin-containing T-complex beta subunit Cct2|Schizosaccharomyces pombe|chr 1|||Manual	16.3722	12.52	1	5	5	5	527	56.6415	5.69385
SPCC736.15	pil1 eisosome protein Pil1|Schizosaccharomyces pombe|chr 3|||Manual	15.5053	14.53	1	5	5	5	351	39.7807	5.41455
SPBC8D2.03c	hhf2 ams3, h4.2|histone H4 h4.2|Schizosaccharomyces pombe|chr 2|||Manual	16.9098	42.72	1	4	4	5	103	11.4165	11.356
SPAC26F1.06	gpm1 monomeric 2,3-bisphosphoglycerate |Schizosaccharomyces pombe|chr 1|||Manual	15.4875	30.81	1	5	5	5	211	23.7505	7.47412
SPAC30D11.12	rpl3802 rpl38-2, rps38|60S ribosomal protein L38 |Schizosaccharomyces pombe|chr 1|||Manual	17.2171	29.73	1	2	2	5	74	8.33371	10.4917
SPAC17G6.13	slt1 sequence orphan Slt1|Schizosaccharomyces pombe|chr 1|||Manual	18.4613	11.55	1	4	4	5	433	49.1072	4.97021
SPCC4G3.14	mdj1 mitochondrial DNAJ domain protein Mdj1 |Schizosaccharomyces pombe|chr 3|||Manual	15.134	11.93	1	5	5	5	528	57.1531	9.34912
SPBC25H2.12c	cct7 chaperonin-containing T-complex eta subunit Cct7|Schizosaccharomyces pombe|chr 2|||Manual	17.6315	11.11	1	4	4	5	558	60.6483	5.75732
SPAC10F6.09c	psm3 smc3|mitotic cohesin complex subunit Psm3|Schizosaccharomyces pombe|chr 1|||Manual	15.2604	4.77	1	5	5	5	1194	136.766	5.74463
SPBC1703.13c	mitochondrial inorganic phosphate transporter |Schizosaccharomyces pombe|chr 2|||Manual	14.4963	16.08	1	4	4	5	311	33.8215	9.49561
SPAC1250.05	rpl3002 rpl30-2, rpl30|60S ribosomal protein L30 |Schizosaccharomyces pombe|chr 1|||Manual	17.5083	35.04	1	4	4	5	117	12.2346	9.81787
SPBP4H10.15	aconitate hydratase/mitochondrial ribosomal protein subunit L49, fusion protein |Schizosaccharomyces pombe|chr 2|||Manual	16.4558	6.75	1	5	5	5	918	99.8381	7.84033
SPBC29A10.04	psm1 smc1|mitotic cohesin complex subunit Psm1|Schizosaccharomyces pombe|chr 2|||Manual	15.0866	4.8	1	5	5	5	1228	140.436	5.88428
SPBC3E7.02c	hsp16 heat shock protein Hsp16|Schizosaccharomyces pombe|chr 2|||Manual	14.9373	30.77	1	4	4	4	143	15.9582	5.99854
SPBC660.07	ntp1 alpha,alpha-trehalase Ntp1|Schizosaccharomyces pombe|chr 2|||Manual	11.105	6.8	1	4	4	4	735	84.5506	6.13818
SPBC2G5.05	transketolase Schizosaccharomyces pombe|chr 2|||Manual	12.4361	6.57	1	4	4	4	685	75.1347	6.80029
SPCC162.08c	nup211 nucleoporin nup211|Schizosaccharomyces pombe|chr 3|||Manual	10.8567	2.67	1	4	4	4	1837	211.331	5.2876
SPAC3A11.12c	rpt5 pam2, tbp1|19S proteasome regulatory subunit Rpt5 |Schizosaccharomyces pombe|chr 1|||Manual	12.0001	11.19	1	4	4	4	438	48.8051	5.09717
SPBP8B7.11	nxt3 glp1|ubiquitin protease cofactor Glp1 |Schizosaccharomyces pombe|chr 2|||Manual	15.7635	15.9	1	4	4	4	434	47.9429	5.38916
SPBC4F6.18c	arf1 ADP-ribosylation factor, Arf family Arf1|Schizosaccharomyces pombe|chr 2|||Manual	12.8998	25	1	4	4	4	180	20.6056	6.20166
SPBC17G9.11c	pyr1 pyruvate carboxylase Pyr1|Schizosaccharomyces pombe|chr 2|||Manual	10.6913	3.54	1	4	4	4	1185	130.778	7.09326
SPCC1682.16	rpt4 19S proteasome regulatory subunit Rpt4 |Schizosaccharomyces pombe|chr 3|||Manual	14.0521	13.4	2	3	4	4	388	43.581	6.1001
SPAC4A8.04	isp6 prb1|vacuolar serine protease Isp6|Schizosaccharomyces pombe|chr 1|||Manual	17.7622	13.49	1	3	3	4	467	49.336	5.49072
SPAC140.02	gar2 nucleolar protein required for rRNA processing|Schizosaccharomyces pombe|chr 1|||Manual	10.0445	9	1	4	4	4	500	52.9561	4.97021
SPAC458.02c	mRNP complex |Schizosaccharomyces pombe|chr 1|||Manual	12.5227	8.97	1	4	4	4	468	53.7032	8.98291
SPBC4.07c	rpt2 mts2|19S proteasome regulatory subunit Rpt2|Schizosaccharomyces pombe|chr 2|||Manual	12.1577	9.82	1	4	4	4	448	50.0288	5.74463
SPAC25G10.06	rps2801 rps28-1|40S ribosomal protein S28 |Schizosaccharomyces pombe|chr 1|||Manual	15.5956	36.76	1	3	3	4	68	7.65924	10.4624
SPAC16.02c	srp2 mRNA export factor Srp2|Schizosaccharomyces pombe|chr 1|||Manual	16.9629	14.52	1	4	4	4	365	42.5405	6.99072
SPAC664.06	rlp7 rpl7|ribosomal protein L7-like Rlp7 involved in ribosome biogenesis |Schizosaccharomyces pombe|chr 1|||Manual	12.2839	14.06	1	4	4	4	249	29.147	10.0815
SPBC16C6.07c	rpt1 19S proteasome regulatory subunit Rpt1 |Schizosaccharomyces pombe|chr 2|||Manual	13.2407	11.64	1	4	4	4	438	48.9341	5.36377
SPBC16C6.02c	vps1302 vps13b|chorein homolog |Schizosaccharomyces pombe|chr 2|||Manual	13.0693	2.1	1	4	4	4	3004	338.803	5.45264
SPAC3A12.18	zwf1 SPAC9.01|glucose-6-phosphate 1-dehydrogenase |Schizosaccharomyces pombe|chr 1|||Manual	14.3362	12	1	4	4	4	500	57.1682	6.17627
SPAC3A12.14	cam1 calmodulin Cam1|Schizosaccharomyces pombe|chr 1|||Manual	21.5654	27.33	1	3	3	4	150	16.895	4.28467
SPAC1751.03	SPAC31A2.01 translation initiation factor eIF3m|Schizosaccharomyces pombe|chr 1|||Manual	14.2483	14.68	1	4	4	4	402	45.0571	5.08447
SPAC15E1.03	rpl42 rpl36a|60S ribosomal protein L36/L42|Schizosaccharomyces pombe|chr 1|||Manual	11.2802	16.98	1	3	3	4	106	12.1977	10.4185
SPAC24C9.15c	spn5 mde9, meu28|septin Spn5|Schizosaccharomyces pombe|chr 1|||Manual	12.9871	11.85	1	4	4	4	464	53.0711	8.11865
SPAC20G8.09c	ribosome biogenesis ATPase |Schizosaccharomyces pombe|chr 1|||Manual	12.2102	6.1	1	4	4	4	1033	116.391	7.81104
SPCC1223.05c	rpl3702 rpl37-2, rpl37|60S ribosomal protein L37 |Schizosaccharomyces pombe|chr 3|||Manual	10.1768	21.98	2	2	2	4	91	10.0801	11.4585
SPBC2G5.06c	hmt2 cad1|sulfide-quinone oxidoreductase|Schizosaccharomyces pombe|chr 2|||Manual	13.6573	10.89	1	4	4	4	459	51.5424	9.51025
SPBC776.15c	kgd2 dihydrolipoamide S-succinyltransferase, e2 component of oxoglutarate dehydrogenase complex Kdg2 |Schizosaccharomyces pombe|chr 2|||Manual	12.7517	13.72	1	4	4	4	452	48.9332	7.7085
SPCC1322.15	rpl3402 rpl34, rpl34-2|60S ribosomal protein L34|Schizosaccharomyces pombe|chr 3|||Manual	16.3167	32.43	2	3	3	4	111	12.7921	11.3706
SPBC8D2.18c	adenosylhomocysteinase Schizosaccharomyces pombe|chr 2|||Manual	11.7758	10.62	1	4	4	4	433	47.3532	5.93506
SPAC3F10.03	grs1 mitochondrial and cytoplasmic glycine-tRNA ligase Grs1 |Schizosaccharomyces pombe|chr 1|||Manual	11.365	6.6	1	4	4	4	652	73.9585	5.92236
SPBC691.04	mitochondrial ATP-dependent RNA helicase Mss116 |Schizosaccharomyces pombe|chr 2|||Manual	16.0604	12.52	1	4	4	4	535	59.4124	10.0962
SPAC4G9.16c	rpl901 rpl9-1|60S ribosomal protein L9|Schizosaccharomyces pombe|chr 1|||Manual	16.0751	23.16	1	1	4	4	190	21.4994	9.46631
SPBC14F5.04c	pgk1 phosphoglycerate kinase Pgk1 |Schizosaccharomyces pombe|chr 2|||Manual	10.7995	9.42	1	3	3	3	414	43.9361	8.14795
SPCC5E4.05c	mitochondrial serine hydrolase |Schizosaccharomyces pombe|chr 3|||Manual	9.83702	9.26	1	3	3	3	378	41.5978	5.96045
SPBC29A3.16	rrs1 ribosome biogenesis protein Rrs1 |Schizosaccharomyces pombe|chr 2|||Manual	11.2272	24.1	1	3	3	3	166	19.0322	9.80322
SPCC576.03c	tpx1 thioredoxin peroxidase Tpx1|Schizosaccharomyces pombe|chr 3|||Manual	12.4264	25	1	3	3	3	192	21.1779	5.59229
SPBC1685.13	fhn1 Fhn1 plasma membrane organization protein|Schizosaccharomyces pombe|chr 2|||Manual	7.88487	18.03	1	3	3	3	183	20.2595	9.78857
SPBC11G11.03	mrt4 mRNA turnover and ribosome assembly protein Mrt4 |Schizosaccharomyces pombe|chr 2|||Manual	12.4245	20.33	1	3	3	3	241	26.6468	8.52881
SPAC3G9.09c	tif211 eIF2alpha|translation initiation factor eIF2 alpha subunit|Schizosaccharomyces pombe|chr 1|||Manual	12.2335	15.03	1	3	3	3	306	34.504	6.46826
SPAC1F7.02c	has1 ATP-dependent RNA helicase Has1 |Schizosaccharomyces pombe|chr 1|||Manual	9.16631	5.88	1	3	3	3	578	65.2211	8.93896
SPAC57A7.04c	pabp mRNA export shuttling protein|Schizosaccharomyces pombe|chr 1|||Manual	9.30095	5.21	1	3	3	3	653	71.4676	5.37646
SPBC649.02	rps1902 rps19-2, rps19|40S ribosomal protein S19 |Schizosaccharomyces pombe|chr 2|||Manual	8.63723	22.38	2	3	3	3	143	16.0523	9.62744
SPAC821.05	translation initiation factor eIF3h |Schizosaccharomyces pombe|chr 1|||Manual	11.2529	11.48	1	3	3	3	357	39.756	5.40186
SPBC2F12.05c	sterol binding ankyrin repeat protein |Schizosaccharomyces pombe|chr 2|||Manual	9.25775	3.13	1	3	3	3	1310	148.384	7.31299
SPBC1539.10	nop16 ribosome biogenesis protein Nop16 |Schizosaccharomyces pombe|chr 2|||Manual	9.98626	19.14	1	3	3	3	209	23.9317	9.71533
SPBC23G7.12c	rpt6 let1|19S proteasome regulatory subunit Rpt6 |Schizosaccharomyces pombe|chr 2|||Manual	11.5288	10.42	1	3	3	3	403	45.041	8.27979
SPBC16A3.15c	nda2 tubulin alpha 1|Schizosaccharomyces pombe|chr 2|||Manual	10.1538	7.91	1	2	2	3	455	51.1196	5.08447
SPCC132.01c	SPCC1322.17c nuclear export mediator factor NEMF|Schizosaccharomyces pombe|chr 3|||Manual	8.35128	3.53	1	3	3	3	1021	114.169	7.89893
SPCC24B10.21	tpi1 tpi|triosephosphate isomerase|Schizosaccharomyces pombe|chr 3|||Manual	8.81951	14.06	1	3	3	3	249	27.21	7.03467
SPAC328.03	tps1 alpha,alpha-trehalose-phosphate synthase [UDP-forming]|Schizosaccharomyces pombe|chr 1|||Manual	9.782	8.38	1	3	3	3	513	58.4566	6.16357
SPBC26H8.08c	grn1 GTPase Grn1|Schizosaccharomyces pombe|chr 2|||Manual	8.63626	8.51	1	3	3	3	470	52.4023	8.85107
SPCP1E11.08	ribosome biogenesis protein Nsa2 |Schizosaccharomyces pombe|chr 3|||Manual	11.9391	16.54	1	3	3	3	260	29.687	10.1987
SPBC646.07c	enoyl reductase |Schizosaccharomyces pombe|chr 2|||Manual	9.15982	13.56	1	3	3	3	295	34.6176	10.1987
SPBC106.06	cct4 chaperonin-containing T-complex delta subunit Cct4|Schizosaccharomyces pombe|chr 2|||Manual	10.2773	8.16	1	3	3	3	527	56.9326	7.63525
SPBC146.14c	sec26 SPBC337.01c|coatomer beta subunit |Schizosaccharomyces pombe|chr 2|||Manual	10.7601	5.32	1	3	3	3	940	104.634	5.64307
SPBC646.11	cct6 chaperonin-containing T-complex zeta subunit Cct6|Schizosaccharomyces pombe|chr 2|||Manual	10.0699	10.28	1	3	3	3	535	58.5116	6.25244
SPBC29A10.14	rec8 meiotic cohesin complex subunit Rec8|Schizosaccharomyces pombe|chr 2|||Manual	9.31357	6.6	1	3	3	3	561	63.9712	5.65576
SPBC1604.09c	exoribonuclease Rex4 |Schizosaccharomyces pombe|chr 2|||Manual	9.3853	13.85	1	3	3	3	260	29.5835	9.70068
SPBC11B10.04c	mrps28 mitochondrial ribosomal protein subunit S28 |Schizosaccharomyces pombe|chr 2|||Manual	8.84494	12.15	1	3	3	3	288	33.9309	9.81787
SPBC713.07c	vacuolar polyphosphatase |Schizosaccharomyces pombe|chr 2|||Manual	10.6697	8.84	1	3	3	3	577	65.9836	5.66846
SPAC644.17c	mrpl9 mitochondrial ribosomal protein subunit L9 |Schizosaccharomyces pombe|chr 1|||Manual	9.85487	15.83	1	3	3	3	259	28.5491	10.4917
SPBC19G7.10c	topoisomerase II-associated deadenylation-dependent mRNA-decapping factor |Schizosaccharomyces pombe|chr 2|||Manual	8.81096	4.64	1	3	3	3	754	84.0647	5.12256
SPAC29B12.01	ino80 SPAC3G6.12|SNF2 family helicase Ino80|Schizosaccharomyces pombe|chr 1|||Manual	9.43344	2.18	1	3	3	3	1604	182.935	8.25049
SPCC825.01	ribosome biogenesis ATPase, Arb family ABCF1-like |Schizosaccharomyces pombe|chr 3|||Manual	7.31779	3.89	1	3	3	3	822	92.6327	6.41748
SPAC27E2.10c	rfc3 SPAPJ698.01c|DNA replication factor C complex subunit Rfc3|Schizosaccharomyces pombe|chr 1|||Manual	8.06065	12.57	1	3	3	3	342	38.4148	7.86963
SPAC14C4.14	atp1 F1-ATPase alpha subunit|Schizosaccharomyces pombe|chr 1|||Manual	11.3491	7.46	1	3	3	3	536	58.551	9.08545
SPAC11G7.03	idh1 glu3|isocitrate dehydrogenase |Schizosaccharomyces pombe|chr 1|||Manual	12.1259	14.61	1	3	3	3	356	38.7341	7.89893
SPCC16C4.15	rml2 mitochondrial ribosomal protein subunit L2 |Schizosaccharomyces pombe|chr 3|||Manual	8.28852	6.91	1	2	2	3	362	40.2216	10.4624
SPAC9.09	met26 homocysteine methyltransferase Met26|Schizosaccharomyces pombe|chr 1|||Manual	6.84078	3.8	1	2	2	2	764	85.2863	6.37939
SPAC22E12.13c	rlp24 ribosomal L24-like protein involved in ribosome biogenesis Rlp24 |Schizosaccharomyces pombe|chr 1|||Manual	5.83441	10.42	1	2	2	2	192	22.2655	9.93506
SPBC23E6.07c	rfc1 DNA replication factor C complex subunit Rfc1|Schizosaccharomyces pombe|chr 2|||Manual	5.74594	2.36	1	2	2	2	934	103.425	9.08545
SPCC1235.01	SPCC320.02c sequence orphan|Schizosaccharomyces pombe|chr 3|||Manual	7.19471	4.56	1	2	2	2	658	69.6505	4.13232
SPCC970.10c	brl2 rfp1|ubiquitin-protein ligase E3 Brl2|Schizosaccharomyces pombe|chr 3|||Manual	5.71879	3.38	1	2	2	2	680	78.0042	6.30322
SPBC16G5.11c	bag101 bag1-a, bag1|BAG family molecular chaperone regulator Bag101 |Schizosaccharomyces pombe|chr 2|||Manual	6.52208	12.31	1	2	2	2	195	22.1918	9.18799
SPAC1687.03c	rfc4 DNA replication factor C complex subunit Rfc4 |Schizosaccharomyces pombe|chr 1|||Manual	8.0023	7.89	1	2	2	2	342	37.6306	7.00537
SPAC27D7.03c	mei2 RNA-binding protein involved in meiosis Mei2|Schizosaccharomyces pombe|chr 1|||Manual	5.22773	3.6	1	2	2	2	750	82.6249	7.34229
SPAC13F5.05	thioredoxin family protein |Schizosaccharomyces pombe|chr 1|||Manual	7.37088	9.92	1	2	2	2	363	40.7381	9.29053
SPBC1685.09	rps29 40S ribosomal protein S29 |Schizosaccharomyces pombe|chr 2|||Manual	4.96972	32.14	1	2	2	2	56	6.65343	10.6821
SPAC19B12.04	rps3001 rps30-1|40S ribosomal protein S30 |Schizosaccharomyces pombe|chr 1|||Manual	5.07564	29.51	1	2	2	2	61	6.90584	11.6782
SPBC354.10	def1 RNAPII degradation factor Def1 |Schizosaccharomyces pombe|chr 2|||Manual	6.86311	1.87	1	1	1	2	963	100.073	9.45166
SPBC1A4.07c	U3 snoRNP-associated protein Sof1 |Schizosaccharomyces pombe|chr 2|||Manual	5.7812	6.19	1	2	2	2	436	49.9635	9.70068
SPAC6G9.06c	pcp1 pericentrin Pcp1|Schizosaccharomyces pombe|chr 1|||Manual	5.79115	1.9	1	2	2	2	1208	140.678	5.31299
SPBC1A4.02c	leu1 SPBC1E8.07c|3-isopropylmalate dehydrogenase Leu1|Schizosaccharomyces pombe|chr 2|||Manual	6.24927	7.01	1	2	2	2	371	39.7079	5.51611
SPBC2F12.02c	mrpl7 mitochondrial ribosomal protein subunit L7 |Schizosaccharomyces pombe|chr 2|||Manual	7.11579	9.41	1	2	2	2	287	32.364	9.67139
SPAC694.02	DEAD/DEAH box helicase|Schizosaccharomyces pombe|chr 1|||Manual	5.0991	1.51	1	2	2	2	1717	194.935	6.16357
SPBC3F6.02c	3 beta-hydroxysteroid dehydrogenase/delta 5-->4-isomerase |Schizosaccharomyces pombe|chr 2|||Manual	5.96476	6.47	1	2	2	2	340	38.2935	6.27783
SPCC1682.04	cdc31 centrin|Schizosaccharomyces pombe|chr 3|||Manual	5.41006	11.36	1	2	2	2	176	20.4572	4.70361
SPBC11C11.06c	sequence orphan|Schizosaccharomyces pombe|chr 2|||Manual	5.88478	13.48	1	2	2	2	178	19.1147	6.53662
SPBC32H8.05	conserved fungal protein|Schizosaccharomyces pombe|chr 2|||Manual	6.32614	22.22	1	2	2	2	117	13.2881	10.4478
SPBC16A3.02c	mitochondrial conserved protein |Schizosaccharomyces pombe|chr 2|||Manual	4.71316	6.05	1	2	2	2	347	38.1625	7.18115
SPBC405.06	DNAJ protein Xdj1 |Schizosaccharomyces pombe|chr 2|||Manual	5.95877	6.78	1	2	2	2	413	46.0971	6.22705
SPBC13G1.01c	nam9 mitochondrial ribosomal protein subunit S4 |Schizosaccharomyces pombe|chr 2|||Manual	5.30101	5.2	1	2	2	2	327	37.6416	10.0083
SPCC1827.05c	nucleolar RNA-binding protein NIFK |Schizosaccharomyces pombe|chr 3|||Manual	6.23637	7.97	1	2	2	2	276	31.3847	9.80322
SPBC1105.02c	lys4 homocitrate synthase |Schizosaccharomyces pombe|chr 2|||Manual	5.95762	4.55	1	2	2	2	418	46.2634	6.06201
SPBC577.02	rpl3801 rpl38-1|60S ribosomal protein L38 |Schizosaccharomyces pombe|chr 2|||Manual	7.31999	18.92	1	1	1	2	74	8.48676	10.1694
SPBC19C2.12	mrpl51 mitochondrial ribosomal protein subunit L51 |Schizosaccharomyces pombe|chr 2|||Manual	5.9847	15.86	1	2	2	2	145	16.5446	9.80322
SPBC1604.05	pgi1 glucose-6-phosphate isomerase |Schizosaccharomyces pombe|chr 2|||Manual	4.9493	4.55	1	2	2	2	550	60.8458	6.41748
SPBC18H10.02	lcf1 long-chain-fatty-acid-CoA ligase Lcf1|Schizosaccharomyces pombe|chr 2|||Manual	5.91855	3.55	1	2	2	2	676	75.9172	8.20654
SPBC14C8.02	tim44 TIM23 translocase complex subunit Tim44 |Schizosaccharomyces pombe|chr 2|||Manual	5.33349	6.32	1	2	2	2	427	48.5197	9.30518
SPCP1E11.09c	rpp103 rpp1-3|60S acidic ribosomal protein Rpp1-3|Schizosaccharomyces pombe|chr 3|||Manual	9.47063	14.68	1	1	1	2	109	11.2096	4.11963
SPBC4F6.14	RNA-binding protein |Schizosaccharomyces pombe|chr 2|||Manual	6.59436	4.45	1	2	2	2	674	76.9869	9.12939
SPAC23C11.11	cka1 orb5|serine/threonine protein kinase Cka1|Schizosaccharomyces pombe|chr 1|||Manual	6.01275	8.43	1	2	2	2	332	39.5022	7.86963
SPBC342.05	crb2 rhp9|DNA repair protein Rad9 homolog, Rhp9|Schizosaccharomyces pombe|chr 2|||Manual	6.18521	3.08	1	1	1	2	778	87.4077	8.08936
SPBC106.19	SPBC582.01 sequence orphan|Schizosaccharomyces pombe|chr 2|||Manual	5.1316	4.27	1	2	2	2	515	59.1881	9.34912
SPCC1020.06c	tal1 transaldolase |Schizosaccharomyces pombe|chr 3|||Manual	5.78654	6.21	1	2	2	2	322	35.2165	5.85889
SPCC1393.11	mitochondrial ribosomal protein subunit L20 |Schizosaccharomyces pombe|chr 3|||Manual	5.21567	11.68	1	2	2	2	197	22.6842	10.6089
SPAC17C9.03	tif471 translation initiation factor eIF4G|Schizosaccharomyces pombe|chr 1|||Manual	5.98298	2.07	1	2	2	2	1403	153.942	9.23193
SPAC29A4.08c	prp19 cwf8|ubiquitin-protein ligase E4|Schizosaccharomyces pombe|chr 1|||Manual	7.53184	6.56	1	2	2	2	488	54.1577	5.10986
SPAC1782.10c	nhp2 box H/ACA snoRNP complex subunit Nhp2|Schizosaccharomyces pombe|chr 1|||Manual	9.91681	25.32	1	2	2	2	154	17.1672	9.20264
SPCC1620.08	succinate-CoA ligase beta subunit |Schizosaccharomyces pombe|chr 3|||Manual	6.18748	5.31	1	2	2	2	433	47.2575	6.87354
SPCC962.04	rps1201 rps12-1, rps12|40S ribosomal protein S12 |Schizosaccharomyces pombe|chr 3|||Manual	6.41933	15.17	1	1	2	2	145	15.6058	4.55127
SPBC4C3.07	translation initiation factor eIF3f|Schizosaccharomyces pombe|chr 2|||Manual	7.5565	7.62	1	2	2	2	302	33.2301	6.37939
SPAC23D3.02	rfc2 DNA replication factor C complex subunit Rfc2|Schizosaccharomyces pombe|chr 1|||Manual	6.0005	8.53	1	2	2	2	340	37.8527	8.17725
SPBC20F10.01	gar1 SPBC25H2.01c|snoRNP pseudouridylase box H/ACA snoRNP complex protein Gar1|Schizosaccharomyces pombe|chr 2|||Manual	10.8132	20.62	1	2	2	2	194	20.1182	11.0923
SPBP19A11.03c	mts4 rpn1|19S proteasome regulatory subunit Mts4|Schizosaccharomyces pombe|chr 2|||Manual	6.89399	3.25	1	2	2	2	891	97.9368	5.021
SPCC1739.02c	mrpl22 mitochondrial ribosomal protein subunit L22 |Schizosaccharomyces pombe|chr 3|||Manual	5.79069	12.45	1	2	2	2	249	28.8854	10.3599
SPBC947.15c	mitochondrial NADH dehydrogenase |Schizosaccharomyces pombe|chr 2|||Manual	6.27098	4.36	1	2	2	2	551	60.742	9.43701
SPAC644.15	rpp101 rpp1-1|60S acidic ribosomal protein Rpp1-1|Schizosaccharomyces pombe|chr 1|||Manual	8.9901	14.68	2	1	1	2	109	11.1345	4.04346
SPAC3G6.04	rnp24 RNA-binding protein Rnp24|Schizosaccharomyces pombe|chr 1|||Manual	5.87085	6.78	1	2	2	2	369	42.0476	9.36377
SPBC31F10.06c	sar1 ADP-ribosylation factor Sar1|Schizosaccharomyces pombe|chr 2|||Manual	5.66115	14.21	1	2	2	2	190	21.266	6.18896
SPBC14F5.13c	vacuolar membrane alkaline phosphatase |Schizosaccharomyces pombe|chr 2|||Manual	6.3678	5.08	1	2	2	2	532	58.6296	5.51611
SPBC18E5.02c	SPBC29A3.20c serine palmitoyltransferase complex subunit |Schizosaccharomyces pombe|chr 2|||Manual	4.73099	4.13	1	2	2	2	509	57.4329	6.60986
SPBC1685.02c	rps1202 rps12-2|40S ribosomal protein S12 |Schizosaccharomyces pombe|chr 2|||Manual	5.54472	14.86	1	1	2	2	148	15.8609	4.64014
SPCC18.12c	utp23 rRNA processing protein Utp23 |Schizosaccharomyces pombe|chr 3|||Manual	5.92236	9.62	1	2	2	2	260	29.6198	9.94971
SPCC1322.04	fyu1 UTP-glucose-1-phosphate uridylyltransferase Fyu1|Schizosaccharomyces pombe|chr 3|||Manual	7.55754	5.53	1	2	2	2	506	56.3944	7.51807
SPBC83.14c	rfc5 DNA replication factor C complex subunit Rfc5 |Schizosaccharomyces pombe|chr 2|||Manual	7.91132	10.61	1	2	2	2	358	40.3776	9.26123
SPAC16E8.06c	nop12 RNA-binding protein Nop12 |Schizosaccharomyces pombe|chr 1|||Manual	5.86111	4.79	1	2	2	2	438	49.3507	9.36377
SPBC30D10.03c	IMP 5'-nucleotidase |Schizosaccharomyces pombe|chr 2|||Manual	6.66651	6.17	1	2	2	2	405	45.7767	6.01123
SPBC14C8.19	tam10 sequence orphan|Schizosaccharomyces pombe|chr 2|||Manual	5.60366	14.29	1	2	2	2	168	19.099	9.979
SPAC18B11.10	tup11 transcriptional corepressor Tup11|Schizosaccharomyces pombe|chr 1|||Manual	3.53612	3.75	1	1	1	1	614	67.2894	6.22705
SPAC2E1P3.04	cao1 spao1|copper amine oxidase Cao1|Schizosaccharomyces pombe|chr 1|||Manual	2.68032	1.54	1	1	1	1	712	81.1892	6.56592
SPCC1235.14	ght5 hexose transporter Ght5|Schizosaccharomyces pombe|chr 3|||Manual	3.5212	2.56	1	1	1	1	546	60.2813	6.02393
SPAC57A10.12c	ura3 dihydroorotate dehydrogenase Ura3|Schizosaccharomyces pombe|chr 1|||Manual	3.5101	3.16	1	1	1	1	443	48.2657	9.62744
SPAC31G5.09c	spk1 MAP kinase Spk1|Schizosaccharomyces pombe|chr 1|||Manual	2.6611	4.3	1	1	1	1	372	41.9766	7.15186
SPBP4H10.06c	cut14 smc2|condensin complex subunit Cut14|Schizosaccharomyces pombe|chr 2|||Manual	2.38836	0.77	1	1	1	1	1172	134.054	7.94287
SPBC2G5.01	DUF1682 family protein|Schizosaccharomyces pombe|chr 2|||Manual	2.97368	2.67	1	1	1	1	374	43.0703	9.0415
SPCC320.10	srp72 signal recognition particle subunit Srp72 |Schizosaccharomyces pombe|chr 3|||Manual	3.58016	2.5	1	1	1	1	561	63.2419	7.69385
SPBC9B6.04c	tuf1 mitochondrial translation elongation factor EF-Tu Tuf1|Schizosaccharomyces pombe|chr 2|||Manual	3.60997	3.19	1	1	1	1	439	48.2518	6.94678
SPAC637.08	iron-sulfur cluster assembly ATPase Nbp35 |Schizosaccharomyces pombe|chr 1|||Manual	2.51661	3.79	1	1	1	1	317	34.2394	4.97021
SPAC637.07	moe1 translation initiation factor eIF3d Moe1|Schizosaccharomyces pombe|chr 1|||Manual	3.15685	1.76	1	1	1	1	567	62.5983	7.06396
SPAC1635.01	mitochondrial outer membrane voltage-dependent anion-selective channel |Schizosaccharomyces pombe|chr 1|||Manual	2.69702	4.26	1	1	1	1	282	29.6352	7.6499
SPAC56F8.03	translation initiation factor IF2 |Schizosaccharomyces pombe|chr 1|||Manual	4.78179	3.34	1	1	1	1	1079	119.857	5.73193
SPCC14G10.01	SPCC18B5.12 dephospho-CoA kinase |Schizosaccharomyces pombe|chr 3|||Manual	3.35408	5.93	1	1	1	1	236	26.8114	8.1626
SPBC4C3.05c	nuc1 rpa1|DNA-directed RNA polymerase I complex large subunit Nuc1|Schizosaccharomyces pombe|chr 2|||Manual	3.66894	0.95	1	1	1	1	1689	189.127	6.63916
SPAC3A11.10c	dipeptidyl peptidase |Schizosaccharomyces pombe|chr 1|||Manual	3.38691	3.18	1	1	1	1	409	46.0186	6.69775
SPAC959.03c	U3 snoRNP-associated protein Utp7 |Schizosaccharomyces pombe|chr 1|||Manual	3.20382	1.92	1	1	1	1	520	59.7211	9.53955
SPBC1685.10	rps27 40S ribosomal protein S27 |Schizosaccharomyces pombe|chr 2|||Manual	2.31459	9.64	1	1	1	1	83	9.16557	8.99756
SPAC15A10.02	taf12 transcription factor TFIID complex subunit A/ SAGA complex subunit|Schizosaccharomyces pombe|chr 1|||Manual	2.91736	2.44	1	1	1	1	450	49.166	9.17334
SPAC23G3.04	ies4 Ino80 complex subunit Ies4|Schizosaccharomyces pombe|chr 1|||Manual	3.47579	11.86	1	1	1	1	194	21.129	9.80322
SPAC6B12.16	meu26 conserved fungal protein|Schizosaccharomyces pombe|chr 1|||Manual	2.22609	2.62	1	1	1	1	344	39.7844	7.56201
SPBC1773.10c	nrs1 ded81|cytoplasmic asparagine-tRNA ligase Nrs1 |Schizosaccharomyces pombe|chr 2|||Manual	3.03895	1.94	1	1	1	1	568	63.8295	6.06201
SPCC18B5.04	rsm18 mitochondrial ribosomal protein subunit S18 |Schizosaccharomyces pombe|chr 3|||Manual	3.5023	7.23	1	1	1	1	166	19.0188	10.3013
SPAC167.07c	SPAC57A7.03c ubiquitin-protein ligase E3 |Schizosaccharomyces pombe|chr 1|||Manual	2.39124	1.07	1	1	1	1	1029	117.692	6.15088
SPBP23A10.08	alp5 arp4|actin-like protein Arp4|Schizosaccharomyces pombe|chr 2|||Manual	2.53148	2.31	1	1	1	1	433	48.7419	4.97021
SPCC794.07	lat1 dihydrolipoamide S-acetyltransferase E2, Lat1 |Schizosaccharomyces pombe|chr 3|||Manual	2.62504	2.69	1	1	1	1	483	52.0279	8.1333
SPBC215.05	gpd1 glycerol-3-phosphate dehydrogenase Gpd1|Schizosaccharomyces pombe|chr 2|||Manual	2.94584	2.34	1	1	1	1	385	41.9683	5.35107
SPAC11H11.06	arp2 SPAC22F8.01|ARP2/3 actin-organizing complex subunit Arp2|Schizosaccharomyces pombe|chr 1|||Manual	2.31034	2.05	1	1	1	1	390	44.2027	6.11279
SPAC31G5.06	rgg8 mitochondrial protein Rgg8 |Schizosaccharomyces pombe|chr 1|||Manual	2.7764	7.69	1	1	1	1	234	27.4758	9.67139
SPAC31G5.01	sap49 SPAPB1A11.05|U2 snRNP-associated RNA-binding protein Sap49|Schizosaccharomyces pombe|chr 1|||Manual	3.17769	4.18	1	1	1	1	335	35.8853	7.89893
SPBC106.05c	tim11 F0-ATPase subunit E |Schizosaccharomyces pombe|chr 2|||Manual	2.27736	7.61	1	1	1	1	92	10.7043	5.84619
SPAC2E1P5.03	DNAJ domain protein Erj5 |Schizosaccharomyces pombe|chr 1|||Manual	2.94803	3.96	1	1	1	1	303	34.7656	10.0083
SPBC16G5.04	mrpl23 mitochondrial ribosomal protein subunit L13 |Schizosaccharomyces pombe|chr 2|||Manual	3.56188	7.64	1	1	1	1	157	17.7571	9.75928
SPAC343.12	rds1 conserved fungal protein|Schizosaccharomyces pombe|chr 1|||Manual	3.94332	3.73	1	1	1	1	402	43.7994	4.7417
SPAC4F10.09c	ribosome biogenesis protein Noc1 |Schizosaccharomyces pombe|chr 1|||Manual	2.43174	1.28	1	1	1	1	860	97.9315	5.43994
SPBC1778.07	methyltransferase N2227 family|Schizosaccharomyces pombe|chr 2|||Manual	2.23666	2.68	1	1	1	1	373	43.3071	5.16064
SPBC29A10.16c	cytochrome b5 |Schizosaccharomyces pombe|chr 2|||Manual	3.77839	22.58	1	1	1	1	124	13.9011	4.729
SPBC365.10	arp5 actin-like protein Arp5|Schizosaccharomyces pombe|chr 2|||Manual	2.3722	1.25	1	1	1	1	721	82.3134	6.0874
SPAC222.06	mak16 nuclear HMG-like acidic protein Mak16 |Schizosaccharomyces pombe|chr 1|||Manual	3.29272	5.96	1	1	1	1	302	35.6049	5.57959
SPAC19D5.04	ptr1 HECT-type ubiquitin ligase E3 Ptr1|Schizosaccharomyces pombe|chr 1|||Manual	2.70591	0.4	1	1	1	1	3227	364.805	5.12256
SPBC11B10.09	cdc2 swo2, cdk1, tws1|cyclin-dependent protein kinase Cdk1/Cdc2|Schizosaccharomyces pombe|chr 2|||Manual	2.48885	3.03	1	1	1	1	297	34.3369	7.57666
SPAC19G12.10c	cpy1 pcy1|vacuolar carboxypeptidase Y|Schizosaccharomyces pombe|chr 1|||Manual	3.57014	0.9	1	1	1	1	1002	114.164	5.49072
SPBC428.05c	arg12 argininosuccinate synthase |Schizosaccharomyces pombe|chr 2|||Manual	3.10123	3.66	1	1	1	1	410	46.0553	5.56689
SPBC902.02c	ctf18 chl12|RFC-like complex subunit Ctf18|Schizosaccharomyces pombe|chr 2|||Manual	2.44851	1.46	1	1	1	1	960	108.583	6.97607
SPCC1393.07c	mug4 sequence orphan|Schizosaccharomyces pombe|chr 3|||Manual	2.24506	1.3	1	1	1	1	845	94.4579	7.6792
SPCC24B10.04	sequence orphan|Schizosaccharomyces pombe|chr 3|||Manual	2.52107	6.03	1	1	1	1	199	23.3512	9.86182
SPBC83.15	ribosome biogenesis protein Nsa1 |Schizosaccharomyces pombe|chr 2|||Manual	2.46829	2.84	1	1	1	1	387	43.7399	6.85889
SPAC22F3.13	tsc1 hamartin|Schizosaccharomyces pombe|chr 1|||Manual	2.84336	1.11	1	1	1	1	899	103.371	5.59229
SPBC36.05c	clr6 histone deacetylase |Schizosaccharomyces pombe|chr 2|||Manual	2.32191	1.98	1	1	1	1	405	46.0823	5.71924
SPBC2D10.12	rhp23 Rad23 homolog Rhp23|Schizosaccharomyces pombe|chr 2|||Manual	3.09979	4.35	1	1	1	1	368	40.1109	4.4624
SPCC24B10.11c	mft1 THO complex subunit 7 Mft1 |Schizosaccharomyces pombe|chr 3|||Manual	2.54362	5.45	1	1	1	1	202	23.2676	4.81787
SPCC790.02	pep3 vps18|ubiquitin-protein ligase E3 |Schizosaccharomyces pombe|chr 3|||Manual	3.10436	1.67	1	1	1	1	900	103.653	5.05908
SPAC20H4.10	ufd2 ubiquitin-protein ligase E4 |Schizosaccharomyces pombe|chr 1|||Manual	2.24908	1.39	1	1	1	1	1010	115.204	5.90967
SPAC1805.08	dlc1 dynein light chain Dlc1|Schizosaccharomyces pombe|chr 1|||Manual	3.13794	9.01	1	1	1	1	111	12.246	5.021
SPAPJ698.02c	rps002 rpsa-2, rps0-2, rps0|40S ribosomal protein S0B|Schizosaccharomyces pombe|chr 1|||Manual	3.15785	3.83	1	1	1	1	287	31.401	5.05908
SPBC25H2.05	egd2 nac1|nascent polypeptide-associated complex alpha subunit Egd2|Schizosaccharomyces pombe|chr 2|||Manual	3.52088	7.51	1	1	1	1	173	18.7737	5.04639
SPCP1E11.06	apl4 AP-1 adaptor complex gamma subunit Apl4|Schizosaccharomyces pombe|chr 3|||Manual	2.64906	1.39	1	1	1	1	865	95.9821	8.35303
SPBC1734.16c	pst3 SIN3 family co-repressor Pst3|Schizosaccharomyces pombe|chr 2|||Manual	2.4407	1.39	1	1	1	1	1154	132.798	6.82959
SPAC4F8.05c	mrpl28 mitochondrial ribosomal protein subunit L28 |Schizosaccharomyces pombe|chr 1|||Manual	2.24499	6.78	1	1	1	1	118	13.7841	9.94971
SPAC4F8.07c	hxk2 hexokinase 2|Schizosaccharomyces pombe|chr 1|||Manual	2.68383	2.42	1	1	1	1	455	50.8878	6.27783
SPBP16F5.07	apm1 AP-1 adaptor complex mu subunit Apm1|Schizosaccharomyces pombe|chr 2|||Manual	2.70348	3.29	1	1	1	1	426	48.9241	7.00537
SPBC577.13	syj2 inositol-polyphosphate 5-phosphatase, synaptojanin homolog 2 |Schizosaccharomyces pombe|chr 2|||Manual	2.76638	1.57	1	1	1	1	889	101.643	6.80029
SPAC21E11.06	tif224 translation initiation factor eIF2B delta subunit |Schizosaccharomyces pombe|chr 1|||Manual	3.24878	3.43	1	1	1	1	467	51.5511	8.73389
SPAC25B8.14	mal2 kinetochore protein, CENP-O ortholog Mal2|Schizosaccharomyces pombe|chr 1|||Manual	3.21475	5.61	1	1	1	1	303	34.4939	5.56689
SPBP4H10.04	ppb1 calcium-dependent serine/threonine protein phosphatase calcineurin A, catalytic subunit Ppb1|Schizosaccharomyces pombe|chr 2|||Manual	2.6103	1.62	1	1	1	1	554	63.6737	5.97314
SPBC146.03c	cut3 smc4|condensin complex subunit Cut3|Schizosaccharomyces pombe|chr 2|||Manual	3.54282	0.98	1	1	1	1	1324	150.56	6.53662
SPAC6B12.05c	ies2 Ino80 complex subunit Ies2|Schizosaccharomyces pombe|chr 1|||Manual	2.92832	4.41	1	1	1	1	295	33.5155	4.71631
SPBC56F2.04	utp20 U3 snoRNP protein Utp20 |Schizosaccharomyces pombe|chr 2|||Manual	3.03086	0.48	1	1	1	1	2493	285.047	6.94678
SPCC584.04	sup35 erf3|translation release factor class II eRF3|Schizosaccharomyces pombe|chr 3|||Manual	3.35923	1.96	1	1	1	1	662	72.511	8.42627
SPAC1565.08	cdc48 SPAC6F12.01, dsc6|AAA family ATPase Cdc48|Schizosaccharomyces pombe|chr 1|||Manual	2.43599	1.1	1	1	1	1	815	90.0687	4.99561
SPBP18G5.03	toc1 Tor complex Tor2 interacting protein 1|Schizosaccharomyces pombe|chr 2|||Manual	2.30361	2.33	1	1	1	1	430	48.7612	5.19873
SPBC4F6.06	kin1 microtubule affinity-regulating kinase Kin1|Schizosaccharomyces pombe|chr 2|||Manual	3.09756	1.46	1	1	1	1	891	98.6881	9.80322
SPAC1F5.06	lsh1 ER heat shock protein Lhs1 |Schizosaccharomyces pombe|chr 1|||Manual	2.40282	1.77	1	1	1	1	848	94.8395	5.65576
SPAC1F5.02	protein disulfide isomerase |Schizosaccharomyces pombe|chr 1|||Manual	2.34323	2.85	1	1	1	1	492	54.8453	4.66553
SPAC4F8.12c	spp42 cwf6|U5 snRNP complex subunit Spp42|Schizosaccharomyces pombe|chr 1|||Manual	2.48904	0.42	1	1	1	1	2363	274.382	8.89502
SPAP19A11.05c	mrp7 SPBP19A11.05c|mitochondrial ribosomal protein subunit L27 |Schizosaccharomyces pombe|chr 2|||Manual	3.90692	8.5	1	1	1	1	153	17.1492	10.77
SPBC16H5.10c	prp43 ATP-dependent RNA helicase Prp43 |Schizosaccharomyces pombe|chr 2|||Manual	2.27494	1.63	1	1	1	1	735	83.7507	6.31592
SPCC63.14	conserved fungal protein|Schizosaccharomyces pombe|chr 3|||Manual	3.635	1.01	1	1	1	1	1184	130.979	6.59521
SPAC767.01c	vps1 SPAC9G1.14c|dynamin family protein Vps1|Schizosaccharomyces pombe|chr 1|||Manual	2.73127	1.62	1	1	1	1	678	75.7438	7.54736
SPBC30B4.03c	adn1 adhesion defective protein, predicted transcriptional regulator |Schizosaccharomyces pombe|chr 2|||Manual	3.37	2.81	1	1	1	1	391	43.8097	8.41162
SPBC31A8.01c	rtn1 cwl1, SPBC651.13c|reticulon-like protein Rtn1|Schizosaccharomyces pombe|chr 2|||Manual	3.18317	3.9	1	1	1	1	308	33.6381	7.47412
SPBC28F2.11	HMG box protein|Schizosaccharomyces pombe|chr 2|||Manual	2.53713	3.55	1	1	1	1	310	33.8703	9.31982
SPAC8C9.04	sequence orphan|Schizosaccharomyces pombe|chr 1|||Manual	2.72546	1.85	1	1	1	1	647	66.9963	5.59229
SPAC607.02c	conserved fungal protein|Schizosaccharomyces pombe|chr 1|||Manual	2.61766	5.19	1	1	1	1	231	27.3387	9.87646
SPAC17A5.14	exo2 exonuclease II Exo2|Schizosaccharomyces pombe|chr 1|||Manual	2.36607	1.36	1	1	1	1	1328	152.493	7.29834
SPCC285.17	spp27 uaf30|RNA polymerase I upstream activation factor complex subunit Spp27|Schizosaccharomyces pombe|chr 3|||Manual	2.49157	5.15	1	1	1	1	233	26.6349	8.74854
SPAC3C7.08c	elf1 AAA family ATPase Elf1|Schizosaccharomyces pombe|chr 1|||Manual	2.9474	0.85	1	1	1	1	1057	116.627	6.52197
SPBC1289.07c	rpc40 rpa42|DNA-directed RNA polymerase I and III subunit Rpc40|Schizosaccharomyces pombe|chr 2|||Manual	2.4764	4.02	1	1	1	1	348	39.1302	5.63037
SPBC216.02	mcp5 num1, mug21|cortical anchoring factor for dynein Mcp5/Num1|Schizosaccharomyces pombe|chr 2|||Manual	2.90311	1.14	1	1	1	1	968	111.304	8.82178
SPAC1296.01c	SPAC22F3.01 phosphoacetylglucosamine mutase |Schizosaccharomyces pombe|chr 1|||Manual	2.22078	2.21	1	1	1	1	542	58.8793	6.02393
SPAC29E6.08	tbp1 tdf1, tbp, SPAC30.12|TATA-binding protein |Schizosaccharomyces pombe|chr 1|||Manual	2.31741	4.33	1	1	1	1	231	25.4263	9.0708
SPAC20G4.06c	adf1 cof1|actin depolymerizing factor, cofilin|Schizosaccharomyces pombe|chr 1|||Manual	2.95117	10.22	1	1	1	1	137	15.61	5.71924
SPCC285.08	ret2 coatomer delta subunit Ret2 |Schizosaccharomyces pombe|chr 3|||Manual	2.85049	5	1	1	1	1	240	27.081	5.5415
SPCC364.06	nap1 nap11|nucleosome assembly protein Nap1|Schizosaccharomyces pombe|chr 3|||Manual	3.58769	5.6	1	1	1	1	393	44.3205	4.61475
SPBC887.14c	pfh1 pif1|5' to 3' DNA helicase, involved in DNA recombination and repair Pif1|Schizosaccharomyces pombe|chr 2|||Manual	2.45431	1.12	1	1	1	1	805	89.9938	9.56885
SPBC31F10.11c	cwf4 syf3|complexed with Cdc5 protein Cwf4|Schizosaccharomyces pombe|chr 2|||Manual	3.48785	2.23	1	1	1	1	674	80.7892	7.12256
SPCC1682.08c	RNA-binding protein Mcp2|Schizosaccharomyces pombe|chr 3|||Manual	2.66658	1.71	1	1	1	1	703	78.5925	8.07471
SPBC8D2.20c	sec31 COPII-coated vesicle component Sec31 |Schizosaccharomyces pombe|chr 2|||Manual	2.36736	0.98	1	1	1	1	1224	132.417	6.23975
SPBC776.08c	Nrap Schizosaccharomyces pombe|chr 2|||Manual	2.27852	0.91	1	1	1	1	1097	126.002	7.54736
SPBC16H5.08c	ribosome biogenesis ATPase, Arb family ABCF2-like |Schizosaccharomyces pombe|chr 2|||Manual	2.9658	2.27	1	1	1	1	618	69.1697	6.17627
SPBC18H10.17c	mitochondrial recombinase Mhr1 |Schizosaccharomyces pombe|chr 2|||Manual	2.54577	9.14	1	1	1	1	175	20.555	9.75928
SPBC2G2.02	syj1 inositol-polyphosphate 5-phosphatase |Schizosaccharomyces pombe|chr 2|||Manual	2.35636	1.02	1	1	1	1	1076	121.746	7.92822
SPAC12G12.07c	conserved fungal protein|Schizosaccharomyces pombe|chr 1|||Manual	3.8252	5.83	1	1	1	1	412	45.6967	5.21143
SPBC16H5.07c	ppa2 serine/threonine protein phosphatase Ppa2|Schizosaccharomyces pombe|chr 2|||Manual	3.53653	4.66	1	1	1	1	322	36.4656	4.93213
SPAC23D3.11	ayr1 1-acyldihydroxyacetone phosphate reductase |Schizosaccharomyces pombe|chr 1|||Manual	3.10196	3.72	1	1	1	1	296	32.7099	7.95752
SPCC1494.06c	ATP-dependent RNA helicase Dbp9 |Schizosaccharomyces pombe|chr 3|||Manual	5.50831	3.7	1	1	1	1	595	67.4089	9.30518
SPAC9E9.07c	ypt2 GTPase Ypt2|Schizosaccharomyces pombe|chr 1|||Manual	2.36966	7	1	1	1	1	200	22.7405	5.78271
SPAC17H9.13c	glutamate 5-kinase |Schizosaccharomyces pombe|chr 1|||Manual	3.0832	3.48	1	1	1	1	402	43.907	8.25049
SPCC1919.10c	myo52 myosin type V|Schizosaccharomyces pombe|chr 3|||Manual	2.51801	0.73	1	1	1	1	1516	175.046	6.66846
SPCC1739.08c	short chain dehydrogenase |Schizosaccharomyces pombe|chr 3|||Manual	2.85075	4.21	1	1	1	1	261	28.3586	8.38232
SPAC1A6.04c	plb1 phospholipase B homolog Plb1|Schizosaccharomyces pombe|chr 1|||Manual	2.61107	1.47	1	1	1	1	613	67.0764	4.91943
SPBPJ4664.02	cell surface glycoprotein |Schizosaccharomyces pombe|chr 2|||Manual	2.57279	0.4	1	1	1	1	3971	394.629	5.90967
SPAC167.05	SPAC57A7.01 Usp |Schizosaccharomyces pombe|chr 1|||Manual	2.2763	2.33	1	1	1	1	601	65.9076	8.89502
SPAC2C4.03c	smd2 cwf9|Sm snRNP core protein Smd2|Schizosaccharomyces pombe|chr 1|||Manual	3.40164	8.7	1	1	1	1	115	13.087	9.74463
SPAC23C4.15	rpb5 DNA-directed RNA polymerase I, II and III subunit Rpb5|Schizosaccharomyces pombe|chr 1|||Manual	2.24484	4.29	1	1	1	1	210	23.9005	9.23193
SPCC970.03	cytochrome b5 reductase |Schizosaccharomyces pombe|chr 3|||Manual	2.86801	3.99	1	1	1	1	301	33.702	9.49561
SPAC26A3.05	chc1 clathrin heavy chain Chc1 |Schizosaccharomyces pombe|chr 1|||Manual	2.54855	0.6	1	1	1	1	1666	189.898	5.23682
SPAC1687.01	rpc19 rpa17, SPAPYUL23.01|DNA-directed RNA polymerase I and III subunit Rpc19|Schizosaccharomyces pombe|chr 1|||Manual	3.56207	16	1	1	1	1	125	13.7127	4.67822
SPAC1687.11	spb1 rRNA methyltransferase Spb1 |Schizosaccharomyces pombe|chr 1|||Manual	3.26241	2	1	1	1	1	802	90.8494	6.49365
SPBP4H10.18c	sequence orphan|Schizosaccharomyces pombe|chr 2|||Manual	2.5936	3.5	1	1	1	1	314	35.8578	10.3306
SPAC227.02c	rRNA processing protein Rrp15 |Schizosaccharomyces pombe|chr 1|||Manual	2.92917	6.34	1	1	1	1	205	23.398	5.65576
SPAC1006.07	translation initiation factor eIF4A |Schizosaccharomyces pombe|chr 1|||Manual	3.79005	4.85	2	1	1	1	392	44.4076	5.021
SPBP4H10.11c	lcf2 long-chain-fatty-acid-CoA ligase|Schizosaccharomyces pombe|chr 2|||Manual	2.49653	1.45	1	1	1	1	689	75.743	6.91748
SPBC12C2.11	SPBC21D10.02 glutamine-fructose-6-phosphate transaminase |Schizosaccharomyces pombe|chr 2|||Manual	3.24053	2.16	1	1	1	1	696	77.2728	6.63916
SPAC227.07c	pab1 protein phosphatase regulatory subunit Pab1|Schizosaccharomyces pombe|chr 1|||Manual	2.55725	2.38	1	1	1	1	463	52.7621	5.70654
SPBC29B5.01	atf1 mts1, sss1, gad7|transcription factor, Atf-CREB family Atf1|Schizosaccharomyces pombe|chr 2|||Manual	3.22835	2.65	1	1	1	1	566	59.6749	5.96045
SPCC1919.09	tif6 translation initiation factor eIF6|Schizosaccharomyces pombe|chr 3|||Manual	4.12897	5.33	1	1	1	1	244	26.2163	4.60205
SPBC1604.21c	ptr3 uba1, SPBC211.09|ubiquitin activating enzyme E1|Schizosaccharomyces pombe|chr 2|||Manual	3.34959	1.58	1	1	1	1	1012	112.877	5.23682
SPBC25B2.01	SPBC2G5.08 elongation factor 1 alpha related protein |Schizosaccharomyces pombe|chr 2|||Manual	2.27491	2.03	1	1	1	1	592	65.9758	5.68115
SPBC215.06c	human LYHRT homolog|Schizosaccharomyces pombe|chr 2|||Manual	3.59264	9.44	1	1	1	1	180	20.5194	9.0708
SPBC2G2.08	ade9 C-1-tetrahydrofolatesynthase/methylenetetrahydrofolatedehydrogenase/methylenetetrahydrofolatecyclohydrolase/ formyltetrahydrofolatesynthetase |Schizosaccharomyces pombe|chr 2|||Manual	2.77343	1.54	1	1	1	1	972	105.69	8.47021
SPBC25H2.11c	spt7 SAGA complex bromodomain subunit Spt7|Schizosaccharomyces pombe|chr 2|||Manual	2.74575	1.21	1	1	1	1	992	112.831	4.93213
SPBP8B7.05c	carbonic anhydrase |Schizosaccharomyces pombe|chr 2|||Manual	3.90623	5.49	1	1	1	1	328	36.9865	9.26123
SPCC4B3.09c	mitochondrial ribosomal protein subunit L12 |Schizosaccharomyces pombe|chr 3|||Manual	2.43239	4.62	1	1	1	1	173	18.9543	9.45166
SPCC23B6.01c	oxysterol binding protein |Schizosaccharomyces pombe|chr 3|||Manual	2.41314	2.3	1	1	1	1	479	54.6137	6.44287
SPBC337.12	human ZC3H3 homolog|Schizosaccharomyces pombe|chr 2|||Manual	3.45605	4.79	1	1	1	1	376	42.2979	8.6167
