# Supplementary material for: Mapping and Analysis of Swi5 and Sfr1 Phosphorylation Sites
Source: Genes (Basel). 2021 Jun 30;12(7):1014. doi: 10.3390/genes12071014 (PMC8305525; doi:10.3390/genes12071014)
Supplement: Supplementary file 1 [file genes-12-01014-s001.zip › TableS2.xlsx]

## Sheet: long list
Accession	Description	Score	Coverage	# Proteins	# Unique Peptides	# Peptides	# PSMs	# AAs	MW [kDa]	calc. pI
SPBC28F2.07	sfr1 dds20, mug13|Swi five-dependent recombination repair protein Sfr1|Schizosaccharomyces pombe|chr 2|||Manual	1236.82	86.29	2	31	32	343	299	33.6172	7.40088
	Confidence Level	Sequence	PSM Ambiguity	# Proteins	# Protein Groups	Protein Group Accessions	Modifications	Activation Type	ΔScore	ΔCn	Rank	Search Engine Rank	pRS Probability	pRS Site Probabilities	pRS Score	Peptides Matched	XCorr	Probability	# Missed Cleavages	Isolation Interference [%]	Ion Inject Time [ms]	Charge	m/z [Da]	MH+ [Da]	ΔM [ppm]	RT [min]	First Scan	Last Scan	MS Order	Ions Matched	Spectrum File
	Low	ALtPDLR	Unconsidered	2	1	SPBC28F2.07	T3(Phospho)	HCD	1	0	1	1	1	T(3): 100.0	179.391	24	1.69607	0	0	11.965	86	2	433.213	865.418	0.00348224	40.5463	9798	9798	MS2	7/17	120406QEx1_Gregan_Cipak_Sfr1_try_10%.raw
some unassigned peaks but probably OK	Low	ALtPDLR	Unconsidered	2	1	SPBC28F2.07	T3(Phospho)	HCD	1	0	1	1	1	T(3): 100.0	222.624	25	1.90261	0	0	2.68495	7	2	433.212	865.418	-0.490206	40.9146	9895	9895	MS2	10/17	120406QEx1_Gregan_Cipak_Sfr1_try_10%.raw
	Low	ALTPDLR	Unconsidered	2	1	SPBC28F2.07		HCD	1	0	1	1				21	1.80493	0	0	49.0165	250	2	393.229	785.451	-0.822415	33.6847	7929	7929	MS2	9/12	120406QEx1_Gregan_Cipak_Sfr1_try_10%.raw
	Low	ALTPDLR	Unconsidered	2	1	SPBC28F2.07		HCD	1	0	1	1				18	1.89218	0	0	0	37	2	393.229	785.451	-1.36637	34.2973	8088	8088	MS2	9/12	120406QEx1_Gregan_Cipak_Sfr1_try_10%.raw
	Low	ALTPDLR	Unconsidered	2	1	SPBC28F2.07		HCD	1	0	1	1				14	1.83097	0	0	4.50829	0	2	393.229	785.452	0.11007	34.6331	8176	8176	MS2	8/12	120406QEx1_Gregan_Cipak_Sfr1_try_10%.raw
	Low	ALTPDLR	Unconsidered	2	1	SPBC28F2.07		HCD	1	0	1	1				16	1.71726	0	0	2.35553	13	2	393.229	785.451	-0.356172	34.9717	8264	8264	MS2	8/12	120406QEx1_Gregan_Cipak_Sfr1_try_10%.raw
	Low	ALTPDLR	Unconsidered	2	1	SPBC28F2.07		HCD	1	0	1	1				20	1.76047	0	0	10.9386	63	2	393.229	785.452	-0.0453437	35.3179	8350	8350	MS2	9/12	120406QEx1_Gregan_Cipak_Sfr1_try_10%.raw
	Low	ALTPDLR	Unconsidered	2	1	SPBC28F2.07		HCD	1	0	1	1				23	1.67995	0	0	20.1003	105	2	393.229	785.451	-0.278465	35.6908	8452	8452	MS2	9/12	120406QEx1_Gregan_Cipak_Sfr1_try_10%.raw
	Low	ALTPDLR	Unconsidered	2	1	SPBC28F2.07		HCD	1	0	1	1				22	1.78974	0	0	39.9405	125	2	393.231	785.454	2.82981	36.0366	8541	8541	MS2	9/12	120406QEx1_Gregan_Cipak_Sfr1_try_10%.raw
	Low	ALTPDLR	Unconsidered	2	1	SPBC28F2.07		HCD	1	0	1	1				22	1.7807	0	0	58.0711	123	2	393.229	785.451	-0.433879	36.476	8658	8658	MS2	9/12	120406QEx1_Gregan_Cipak_Sfr1_try_10%.raw
	Low	ALTPDLR	Unconsidered	2	1	SPBC28F2.07		HCD	1	0	1	1				23	1.77395	0	0	48.6701	149	2	393.229	785.451	-0.356172	36.8915	8765	8765	MS2	9/12	120406QEx1_Gregan_Cipak_Sfr1_try_10%.raw
	High	ALTPDLRDTK	Unambiguous	2	1	SPBC28F2.07		HCD	1	0	1	1				55	2.66871	0	1	4.72559	250	2	565.314	1129.62	-1.25947	30.5574	7100	7100	MS2	11/18	120406QEx1_Gregan_Cipak_Sfr1_try_10%.raw
	High	ALTPDLRDTK	Unambiguous	2	1	SPBC28F2.07		HCD	1	0	1	1				66	2.85108	0	1	33.3153	250	3	377.212	1129.62	0.781823	30.5691	7103	7103	MS2	11/36	120406QEx1_Gregan_Cipak_Sfr1_try_10%.raw
spectrum OK	High	cNNsGNHSDNLGFIEQSETVHPENEK	Unambiguous	2	1	SPBC28F2.07	C1(Carbamidomethyl); S4(Phospho)	HCD	1	0	1	1	8.25582e-05	S(4): 0.0; S(8): 100.0; S(17): 0.0; T(19): 0.0	532.525	796	6.09102	0	0	0	93	3	1012.75	3036.24	0.520219	41.2224	9985	9985	MS2	30/148	120406QEx1_Gregan_Cipak_Sfr1_try_10%.raw
spectrum OK	High	cNNSGNHsDNLGFIEQSETVHPENEK	Unambiguous	2	1	SPBC28F2.07	C1(Carbamidomethyl); S8(Phospho)	HCD	1	0	1	1	0.977402	S(4): 2.3; S(8): 97.7; S(17): 0.0; T(19): 0.0	304.463	1012	6.41465	0	0	16.232	241	4	759.816	3036.24	-0.429013	41.2697	9998	9998	MS2	25/222	120406QEx1_Gregan_Cipak_Sfr1_try_10%.raw
	High	cNNSGNHSDNLGFIEQSETVHPENEK	Unambiguous	2	1	SPBC28F2.07	C1(Carbamidomethyl)	HCD	1	0	1	1				640	6.46395	0	0	6.24747	145	3	986.096	2956.27	-1.33691	37.3175	8887	8887	MS2	24/100	120406QEx1_Gregan_Cipak_Sfr1_try_10%.raw
	High	cNNSGNHSDNLGFIEQSETVHPENEK	Unambiguous	2	1	SPBC28F2.07	C1(Carbamidomethyl)	HCD	1	0	1	1				860	7.58333	0	0	0	158	4	739.824	2956.27	-1.25888	37.3206	8888	8888	MS2	24/150	120406QEx1_Gregan_Cipak_Sfr1_try_10%.raw
	High	cNNSGNHSDNLGFIEQSETVHPENEK	Unambiguous	2	1	SPBC28F2.07	C1(Carbamidomethyl)	HCD	1	0	1	1				983	5.23149	0	0	29.5404	61	5	592.061	2956.27	-0.602754	37.513	8944	8944	MS2	23/200	120406QEx1_Gregan_Cipak_Sfr1_try_10%.raw
	High	cNNSGNHSDNLGFIEQSETVHPENEK	Unambiguous	2	1	SPBC28F2.07	C1(Carbamidomethyl)	HCD	1	0	1	1				719	6.03539	0	0	0.0416952	2	4	739.825	2956.28	0.805719	37.6661	8988	8988	MS2	27/150	120406QEx1_Gregan_Cipak_Sfr1_try_10%.raw
	High	cNNSGNHSDNLGFIEQSETVHPENEK	Unambiguous	2	1	SPBC28F2.07	C1(Carbamidomethyl)	HCD	1	0	1	1				671	6.47222	0	0	0.161058	2	3	986.097	2956.28	0.397349	37.6674	8989	8989	MS2	23/100	120406QEx1_Gregan_Cipak_Sfr1_try_10%.raw
	High	cNNSGNHSDNLGFIEQSETVHPENEK	Unambiguous	2	1	SPBC28F2.07	C1(Carbamidomethyl)	HCD	1	0	1	1				892	6.27107	0	0	0	39	4	739.824	2956.27	-1.09371	38.024	9087	9087	MS2	27/150	120406QEx1_Gregan_Cipak_Sfr1_try_10%.raw
	High	cNNSGNHSDNLGFIEQSETVHPENEK	Unambiguous	2	1	SPBC28F2.07	C1(Carbamidomethyl)	HCD	1	0	1	1				665	7.07774	0	0	0	41	3	986.097	2956.28	-0.160092	38.0252	9088	9088	MS2	26/100	120406QEx1_Gregan_Cipak_Sfr1_try_10%.raw
	High	cNNSGNHSDNLGFIEQSETVHPENEK	Unambiguous	2	1	SPBC28F2.07	C1(Carbamidomethyl)	HCD	1	0	1	1				919	7.14377	0	0	10.1806	213	4	739.824	2956.28	-0.26787	39.3039	9444	9444	MS2	23/150	120406QEx1_Gregan_Cipak_Sfr1_try_10%.raw
	High	cNNSGNHSDNLGFIEQSETVHPENEK	Unambiguous	2	1	SPBC28F2.07	C1(Carbamidomethyl)	HCD	1	0	1	1				585	6.1503	0	0	6.55883	245	3	986.095	2956.27	-2.20405	39.5696	9518	9518	MS2	22/100	120406QEx1_Gregan_Cipak_Sfr1_try_10%.raw
	Medium	DLQTLIQK	Unambiguous	2	1	SPBC28F2.07		HCD	1	0	1	1				28	2.02663	0	0	11.2679	38	2	479.782	958.557	-0.192071	44.58	10922	10922	MS2	8/14	120406QEx1_Gregan_Cipak_Sfr1_try_10%.raw
	Low	DLQTLIQK	Unconsidered	2	1	SPBC28F2.07		HCD	1	0	1	1				27	1.79436	0	0	0.619969	1	2	479.782	958.557	0.508342	44.9283	11013	11013	MS2	8/14	120406QEx1_Gregan_Cipak_Sfr1_try_10%.raw
	Low	DLQTLIQK	Unconsidered	2	1	SPBC28F2.07		HCD	1	0	1	1				37	1.70937	0	0	18.7251	17	2	479.782	958.556	-0.446768	45.2813	11113	11113	MS2	8/14	120406QEx1_Gregan_Cipak_Sfr1_try_10%.raw
spectrum OK	High	DsQGQLGIENPPK	Unambiguous	1	1	SPBC28F2.07	S2(Phospho)	HCD	1	0	1	1	1	S(2): 100.0	268.244	92	3.5517	0	0	44.8966	250	2	731.833	1462.66	0.225714	41.7291	10127	10127	MS2	17/35	120406QEx1_Gregan_Cipak_Sfr1_try_10%.raw
	High	DSQGQLGIENPPK	Unambiguous	1	1	SPBC28F2.07		HCD	1	0	1	1				77	3.91509	0	0	0	250	2	691.848	1382.69	-1.59901	35.2241	8326	8326	MS2	14/24	120406QEx1_Gregan_Cipak_Sfr1_try_10%.raw
	High	DSQGQLGIENPPK	Unambiguous	1	1	SPBC28F2.07		HCD	1	0	1	1				75	2.7386	0	0	40.3546	95	3	461.569	1382.69	-0.0196057	35.5559	8416	8416	MS2	14/48	120406QEx1_Gregan_Cipak_Sfr1_try_10%.raw
	High	DSQGQLGIENPPK	Unambiguous	1	1	SPBC28F2.07		HCD	1	0	1	1				75	4.18746	0	0	1.88807	3	2	691.849	1382.69	0.431542	35.5849	8424	8424	MS2	15/24	120406QEx1_Gregan_Cipak_Sfr1_try_10%.raw
	High	DSQGQLGIENPPK	Unambiguous	1	1	SPBC28F2.07		HCD	1	0	1	1				87	3.59449	0	0	5.40847	10	3	461.568	1382.69	-0.28446	35.8996	8506	8506	MS2	14/48	120406QEx1_Gregan_Cipak_Sfr1_try_10%.raw
	High	DSQGQLGIENPPK	Unambiguous	1	1	SPBC28F2.07		HCD	1	0	1	1				68	3.33756	0	0	0.136673	0	2	691.85	1382.69	1.13782	35.9231	8512	8512	MS2	15/24	120406QEx1_Gregan_Cipak_Sfr1_try_10%.raw
	High	DSQGQLGIENPPK	Unambiguous	1	1	SPBC28F2.07		HCD	1	0	1	1				82	3.37512	0	0	31.2776	202	3	461.569	1382.69	0.377675	36.2635	8599	8599	MS2	14/48	120406QEx1_Gregan_Cipak_Sfr1_try_10%.raw
	High	DSQGQLGIENPPK	Unambiguous	1	1	SPBC28F2.07		HCD	1	0	1	1				70	3.75302	0	0	0.670949	3	2	691.848	1382.69	-1.15758	36.2739	8602	8602	MS2	15/24	120406QEx1_Gregan_Cipak_Sfr1_try_10%.raw
	High	DSQGQLGIENPPK	Unambiguous	1	1	SPBC28F2.07		HCD	1	0	1	1				79	3.23219	0	0	34.1	28	2	691.852	1382.7	4.05119	36.768	8728	8728	MS2	14/24	120406QEx1_Gregan_Cipak_Sfr1_try_10%.raw
	High	DSQGQLGIENPPK	Unambiguous	1	1	SPBC28F2.07		HCD	1	0	1	1				81	4.23115	0	0	0	101	2	691.847	1382.69	-3.36471	37.1369	8835	8835	MS2	14/24	120406QEx1_Gregan_Cipak_Sfr1_try_10%.raw
	High	DSQGQLGIENPPK	Unambiguous	1	1	SPBC28F2.07		HCD	1	0	1	1				81	3.58742	0	0	52.0487	92	2	691.849	1382.69	0.343257	37.8729	9048	9048	MS2	14/24	120406QEx1_Gregan_Cipak_Sfr1_try_10%.raw
	High	DSQGQLGIENPPK	Unambiguous	1	1	SPBC28F2.07		HCD	1	0	1	1				82	3.48569	0	0	33.8204	104	2	691.849	1382.69	0.431542	38.5126	9222	9222	MS2	14/24	120406QEx1_Gregan_Cipak_Sfr1_try_10%.raw
	High	DSQGQLGIENPPK	Unambiguous	1	1	SPBC28F2.07		HCD	1	0	1	1				88	2.64878	0	0	41.0309	250	2	691.849	1382.69	-0.892728	39.2673	9434	9434	MS2	11/24	120406QEx1_Gregan_Cipak_Sfr1_try_10%.raw
	High	DSQGQLGIENPPK	Unambiguous	1	1	SPBC28F2.07		HCD	1	0	1	1				86	2.87623	0	0	12.2351	250	2	691.849	1382.69	-0.892728	39.6436	9538	9538	MS2	14/24	120406QEx1_Gregan_Cipak_Sfr1_try_10%.raw
	High	DSQGQLGIENPPK	Unambiguous	1	1	SPBC28F2.07		HCD	1	0	1	1				90	2.75057	0	0	45.4785	250	2	691.85	1382.69	0.608111	40.4486	9769	9769	MS2	10/24	120406QEx1_Gregan_Cipak_Sfr1_try_10%.raw
	High	DTKIHTSLPITTPFSK	Unambiguous	2	1	SPBC28F2.07		HCD	1	0	1	1				54	4.09896	0	1	21.9628	250	3	595.996	1785.97	-0.175805	45.0678	11055	11055	MS2	17/60	120406QEx1_Gregan_Cipak_Sfr1_try_10%.raw
spectrum OK	Medium	EDLKVSLsESDLR	Unambiguous	1	1	SPBC28F2.07	S8(Phospho)	HCD	1	0	1	1	0.999506	S(6): 0.0; S(8): 100.0; S(10): 0.0	159.527	160	2.55586	0	1	23.0703	64	3	524.251	1570.74	1.92684	46.8633	11563	11563	MS2	11/70	120406QEx1_Gregan_Cipak_Sfr1_try_10%.raw
	High	EDLKVSLSESDLR	Unambiguous	1	1	SPBC28F2.07		HCD	1	0	1	1				85	3.88645	0	1	26.9643	175	3	497.595	1490.77	-0.14517	41.7086	10122	10122	MS2	15/48	120406QEx1_Gregan_Cipak_Sfr1_try_10%.raw
	High	EDLKVSLSESDLR	Unambiguous	1	1	SPBC28F2.07		HCD	1	0	1	1				69	4.309	0	1	9.73864	250	2	745.888	1490.77	-0.115679	41.7133	10123	10123	MS2	15/24	120406QEx1_Gregan_Cipak_Sfr1_try_10%.raw
	Low	GQIQEVR	Unconsidered	2	1	SPBC28F2.07		HCD	1	0	1	1				27	1.8791	0	0	4.72732	7	2	415.23	829.453	0.150808	22.6092	5142	5142	MS2	7/12	120406QEx1_Gregan_Cipak_Sfr1_try_10%.raw
	Medium	GQIQEVR	Unambiguous	2	1	SPBC28F2.07		HCD	1	0	1	1				25	1.9249	0	0	0.811492	0	2	415.23	829.454	1.25458	22.9535	5227	5227	MS2	7/12	120406QEx1_Gregan_Cipak_Sfr1_try_10%.raw
	Medium	GQIQEVR	Unambiguous	2	1	SPBC28F2.07		HCD	1	0	1	1				28	1.95849	0	0	4.40329	6	2	415.23	829.453	0.739486	23.3156	5313	5313	MS2	7/12	120406QEx1_Gregan_Cipak_Sfr1_try_10%.raw
	Low	GQIQEVR	Unconsidered	2	1	SPBC28F2.07		HCD	1	0	1	1				38	1.87218	0	0	5.39286	19	2	415.23	829.452	-0.437871	23.6614	5395	5395	MS2	7/12	120406QEx1_Gregan_Cipak_Sfr1_try_10%.raw
	Low	GQIQEVR	Unconsidered	2	1	SPBC28F2.07		HCD	1	0	1	1				27	1.87937	0	0	7.75595	26	2	415.23	829.453	0.0772228	24.004	5480	5480	MS2	7/12	120406QEx1_Gregan_Cipak_Sfr1_try_10%.raw
	Medium	GQIQEVR	Unambiguous	2	1	SPBC28F2.07		HCD	1	0	1	1				39	1.98753	0	0	48.3834	37	2	415.23	829.453	0.0772228	24.7822	5671	5671	MS2	7/12	120406QEx1_Gregan_Cipak_Sfr1_try_10%.raw
	Low	GQIQEVR	Unconsidered	2	1	SPBC28F2.07		HCD	1	0	1	1				39	1.89168	0	0	6.55619	60	2	415.23	829.453	-0.217117	25.1331	5761	5761	MS2	7/12	120406QEx1_Gregan_Cipak_Sfr1_try_10%.raw
	Medium	GQIQEVR	Unambiguous	2	1	SPBC28F2.07		HCD	1	0	1	1				36	1.90744	0	0	13.2034	82	2	415.23	829.452	-0.290702	25.4868	5852	5852	MS2	7/12	120406QEx1_Gregan_Cipak_Sfr1_try_10%.raw
	Medium	GQIQEVR	Unambiguous	2	1	SPBC28F2.07		HCD	1	0	1	1				39	2.14611	0	0	79.1002	103	2	415.23	829.452	-0.290702	25.8909	5956	5956	MS2	6/12	120406QEx1_Gregan_Cipak_Sfr1_try_10%.raw
	Medium	GQIQEVR	Unambiguous	2	1	SPBC28F2.07		HCD	1	0	1	1				39	1.93128	0	0	57.2179	128	2	415.23	829.453	-0.0699469	26.3389	6063	6063	MS2	7/12	120406QEx1_Gregan_Cipak_Sfr1_try_10%.raw
	Medium	GQIQEVR	Unambiguous	2	1	SPBC28F2.07		HCD	1	0	1	1				37	1.99939	0	0	32.1665	250	2	415.229	829.451	-2.20391	28.9391	6687	6687	MS2	6/12	120406QEx1_Gregan_Cipak_Sfr1_try_10%.raw
	Low	GQIQEVR	Unconsidered	2	1	SPBC28F2.07		HCD	1	0	1	1				35	1.75056	0	0	52.7599	250	2	415.231	829.455	2.72627	29.7086	6881	6881	MS2	6/12	120406QEx1_Gregan_Cipak_Sfr1_try_10%.raw
	High	IEEGENKGQIQEVR	Unambiguous	2	1	SPBC28F2.07		HCD	1	0	1	1				71	5.10183	0	1	3.01273	250	2	814.915	1628.82	-0.912319	25.7113	5906	5906	MS2	18/26	120406QEx1_Gregan_Cipak_Sfr1_try_10%.raw
	High	IEEGENKGQIQEVR	Unambiguous	2	1	SPBC28F2.07		HCD	1	0	1	1				96	4.44829	0	1	21.179	39	3	543.613	1628.82	-0.171135	25.7205	5910	5910	MS2	17/52	120406QEx1_Gregan_Cipak_Sfr1_try_10%.raw
	High	IEEGENKGQIQEVR	Unambiguous	2	1	SPBC28F2.07		HCD	1	0	1	1				75	4.64686	0	1	1.52821	153	2	814.915	1628.82	-0.237824	26.0671	5996	5996	MS2	20/26	120406QEx1_Gregan_Cipak_Sfr1_try_10%.raw
	High	IEEGENKGQIQEVR	Unambiguous	2	1	SPBC28F2.07		HCD	1	0	1	1				98	4.52821	0	1	14.4398	104	3	543.613	1628.82	-0.0587195	26.1113	6008	6008	MS2	16/52	120406QEx1_Gregan_Cipak_Sfr1_try_10%.raw
	High	IEEGENKGQIQEVR	Unambiguous	2	1	SPBC28F2.07		HCD	1	0	1	1				78	3.23644	0	1	11.8854	250	2	814.917	1628.83	1.26105	26.4922	6102	6102	MS2	13/26	120406QEx1_Gregan_Cipak_Sfr1_try_10%.raw
	High	IHTSLPITTPFSK	Unambiguous	2	1	SPBC28F2.07		HCD	1	0	1	1				30	3.53306	0	0	28.4814	19	3	481.273	1441.8	-0.0388573	45.4866	11170	11170	MS2	15/48	120406QEx1_Gregan_Cipak_Sfr1_try_10%.raw
	High	IHTSLPITTPFSK	Unambiguous	2	1	SPBC28F2.07		HCD	1	0	1	1				31	4.37366	0	0	1.98716	36	2	721.406	1441.8	-0.26236	45.4879	11171	11171	MS2	15/24	120406QEx1_Gregan_Cipak_Sfr1_try_10%.raw
	High	IHTSLPITTPFSK	Unambiguous	2	1	SPBC28F2.07		HCD	1	0	1	1				25	3.31361	0	0	0.646975	1	3	481.274	1441.81	1.8661	45.844	11264	11264	MS2	15/48	120406QEx1_Gregan_Cipak_Sfr1_try_10%.raw
	High	IHTSLPITTPFSK	Unambiguous	2	1	SPBC28F2.07		HCD	1	0	1	1				27	4.10247	0	0	0.0971521	1	2	721.406	1441.81	0.330295	45.8452	11265	11265	MS2	15/24	120406QEx1_Gregan_Cipak_Sfr1_try_10%.raw
	High	IHTSLPITTPFSK	Unambiguous	2	1	SPBC28F2.07		HCD	1	0	1	1				28	3.64542	0	0	11.8592	14	3	481.273	1441.81	0.278636	46.188	11372	11372	MS2	14/48	120406QEx1_Gregan_Cipak_Sfr1_try_10%.raw
	High	IHTSLPITTPFSK	Unambiguous	2	1	SPBC28F2.07		HCD	1	0	1	1				30	4.0681	0	0	1.042	22	2	721.406	1441.8	-0.60102	46.1978	11376	11376	MS2	14/24	120406QEx1_Gregan_Cipak_Sfr1_try_10%.raw
	High	IHTSLPITTPFSK	Unambiguous	2	1	SPBC28F2.07		HCD	1	0	1	1				31	3.78831	0	0	26.1306	74	3	481.273	1441.8	-0.92784	46.6667	11508	11508	MS2	14/48	120406QEx1_Gregan_Cipak_Sfr1_try_10%.raw
	High	IHTSLPITTPFSK	Unambiguous	2	1	SPBC28F2.07		HCD	1	0	1	1				22	2.70261	0	0	43.7096	48	3	481.274	1441.81	1.6756	47.0177	11602	11602	MS2	13/48	120406QEx1_Gregan_Cipak_Sfr1_try_10%.raw
	High	IHTSLPITTPFSK	Unambiguous	2	1	SPBC28F2.07		HCD	1	0	1	1				30	3.39987	0	0	51.8988	102	2	721.407	1441.81	0.584289	47.1873	11649	11649	MS2	13/24	120406QEx1_Gregan_Cipak_Sfr1_try_10%.raw
	High	IHTSLPITTPFSK	Unambiguous	2	1	SPBC28F2.07		HCD	1	0	1	1				31	3.26927	0	0	46.1474	94	2	721.407	1441.81	0.753619	47.5384	11744	11744	MS2	13/24	120406QEx1_Gregan_Cipak_Sfr1_try_10%.raw
	High	IHTSLPITTPFSK	Unambiguous	2	1	SPBC28F2.07		HCD	1	0	1	1				31	3.39068	0	0	21.9963	134	3	481.273	1441.8	-0.292852	47.7229	11796	11796	MS2	15/48	120406QEx1_Gregan_Cipak_Sfr1_try_10%.raw
	High	IHTSLPITTPFSK	Unambiguous	2	1	SPBC28F2.07		HCD	1	0	1	1				31	4.16435	0	0	45.1227	250	2	721.407	1441.81	0.838284	47.9052	11846	11846	MS2	14/24	120406QEx1_Gregan_Cipak_Sfr1_try_10%.raw
	High	IHTSLPITTPFSK	Unambiguous	2	1	SPBC28F2.07		HCD	1	0	1	1				31	3.32758	0	0	21.4646	193	3	481.273	1441.8	-1.11834	48.3448	11974	11974	MS2	13/48	120406QEx1_Gregan_Cipak_Sfr1_try_10%.raw
	High	IHTSLPITTPFSK	Unambiguous	2	1	SPBC28F2.07		HCD	1	0	1	1				34	3.75385	0	0	18.2638	250	2	721.406	1441.81	0.0763	48.4566	12006	12006	MS2	14/24	120406QEx1_Gregan_Cipak_Sfr1_try_10%.raw
	High	IHTSLPITTPFSK	Unambiguous	2	1	SPBC28F2.07		HCD	1	0	1	1				30	2.84238	0	0	32.2072	220	3	481.273	1441.81	0.0881401	48.725	12075	12075	MS2	11/48	120406QEx1_Gregan_Cipak_Sfr1_try_10%.raw
	High	IHTSLPITTPFSK	Unambiguous	2	1	SPBC28F2.07		HCD	1	0	1	1				35	3.68078	0	0	22.665	250	2	721.406	1441.81	0.160965	48.8323	12101	12101	MS2	14/24	120406QEx1_Gregan_Cipak_Sfr1_try_10%.raw
	High	IHTSLPITTPFSKK	Unambiguous	2	1	SPBC28F2.07		HCD	1	0	1	1				29	4.50783	0	1	21.2626	250	3	523.971	1569.9	-0.132435	39.3113	9446	9446	MS2	17/52	120406QEx1_Gregan_Cipak_Sfr1_try_10%.raw
spectrum OK	High	LAGGVTQsFR	Unambiguous	2	1	SPBC28F2.07	S8(Phospho)	HCD	1	0	1	1	0.999999	T(6): 0.0; S(8): 100.0	264.309	84	2.93993	0	0	24.2786	170	2	558.265	1115.52	-2.37926	38.8249	9309	9309	MS2	14/26	120406QEx1_Gregan_Cipak_Sfr1_try_10%.raw
	High	LAGGVTQSFR	Unambiguous	2	1	SPBC28F2.07		HCD	1	0	1	1				52	2.41529	0	0	40.1208	72	2	518.283	1035.56	-0.301647	25.3608	5820	5820	MS2	12/18	120406QEx1_Gregan_Cipak_Sfr1_try_10%.raw
	High	LAGGVTQSFR	Unambiguous	2	1	SPBC28F2.07		HCD	1	0	1	1				44	2.9942	0	0	30.5156	74	2	518.283	1035.56	1.1129	34.0921	8033	8033	MS2	12/18	120406QEx1_Gregan_Cipak_Sfr1_try_10%.raw
	High	LAGGVTQSFR	Unambiguous	2	1	SPBC28F2.07		HCD	1	0	1	1				43	2.8975	0	0	0.78941	0	2	518.283	1035.56	-0.419526	34.4398	8129	8129	MS2	12/18	120406QEx1_Gregan_Cipak_Sfr1_try_10%.raw
	High	LAGGVTQSFR	Unambiguous	2	1	SPBC28F2.07		HCD	1	0	1	1				39	3.02431	0	0	1.87205	7	2	518.283	1035.56	0.0519892	35.0677	8288	8288	MS2	12/18	120406QEx1_Gregan_Cipak_Sfr1_try_10%.raw
	High	LAGGVTQSFR	Unambiguous	2	1	SPBC28F2.07		HCD	1	0	1	1				40	3.10729	0	0	4.95238	16	2	518.283	1035.56	0.287747	35.43	8381	8381	MS2	12/18	120406QEx1_Gregan_Cipak_Sfr1_try_10%.raw
	High	LAGGVTQSFR	Unambiguous	2	1	SPBC28F2.07		HCD	1	0	1	1				40	2.70591	0	0	9.55886	19	2	518.283	1035.56	0.287747	35.7959	8479	8479	MS2	12/18	120406QEx1_Gregan_Cipak_Sfr1_try_10%.raw
	High	LAGGVTQSFR	Unambiguous	2	1	SPBC28F2.07		HCD	1	0	1	1				45	2.78612	0	0	25.9206	30	2	518.283	1035.56	0.169868	36.8444	8750	8750	MS2	12/18	120406QEx1_Gregan_Cipak_Sfr1_try_10%.raw
	High	LAGGVTQSFR	Unambiguous	2	1	SPBC28F2.07		HCD	1	0	1	1				46	2.46745	0	0	43.9692	33	2	518.284	1035.56	2.52744	37.2813	8877	8877	MS2	12/18	120406QEx1_Gregan_Cipak_Sfr1_try_10%.raw
	High	LAGGVTQSFR	Unambiguous	2	1	SPBC28F2.07		HCD	1	0	1	1				47	2.70137	0	0	38.3753	88	2	518.284	1035.56	2.76319	37.6728	8992	8992	MS2	12/18	120406QEx1_Gregan_Cipak_Sfr1_try_10%.raw
	High	LAGGVTQSFR	Unambiguous	2	1	SPBC28F2.07		HCD	1	0	1	1				43	2.85514	0	0	31.2502	96	2	518.283	1035.56	0.405625	38.031	9091	9091	MS2	12/18	120406QEx1_Gregan_Cipak_Sfr1_try_10%.raw
	High	LAGGVTQSFR	Unambiguous	2	1	SPBC28F2.07		HCD	1	0	1	1				54	2.81813	0	0	37.475	250	2	518.283	1035.56	0.87714	38.7418	9289	9289	MS2	12/18	120406QEx1_Gregan_Cipak_Sfr1_try_10%.raw
	High	LAGGVTQSFR	Unambiguous	2	1	SPBC28F2.07		HCD	1	0	1	1				48	2.3158	0	0	55.8207	170	2	518.282	1035.56	-0.537405	39.1642	9404	9404	MS2	11/18	120406QEx1_Gregan_Cipak_Sfr1_try_10%.raw
	High	LAGGVTQSFRIEEGENKGQIQEVR	Unambiguous	2	1	SPBC28F2.07		HCD	1	0	1	1				119	6.8472	0	2	0	250	4	662.096	2645.36	-0.147047	39.1608	9403	9403	MS2	26/138	120406QEx1_Gregan_Cipak_Sfr1_try_10%.raw
spectrum OK	High	LFKsPISNcLNPK	Unambiguous	1	1	SPBC28F2.07	S4(Phospho); C9(Carbamidomethyl)	HCD	1	0	1	1	1	S(4): 100.0; S(7): 0.0	366.439	118	3.64561	0	1	0	91	2	799.394	1597.78	0.0469951	42.1414	10255	10255	MS2	14/35	120406QEx1_Gregan_Cipak_Sfr1_try_10%.raw
	High	LFKsPISNcLNPK	Unambiguous	1	1	SPBC28F2.07	S4(Phospho); C9(Carbamidomethyl)	HCD	1	0	1	1	1	S(4): 100.0; S(7): 0.0	213.035	132	3.19129	0	1	0	38	3	533.265	1597.78	-0.80182	42.2063	10272	10272	MS2	11/70	120406QEx1_Gregan_Cipak_Sfr1_try_10%.raw
	High	LFKsPISNcLNPK	Unambiguous	1	1	SPBC28F2.07	S4(Phospho); C9(Carbamidomethyl)	HCD	1	0	1	1	1	S(4): 100.0; S(7): 0.0	406.973	109	3.19673	0	1	0	5	2	799.393	1597.78	-1.1754	42.4939	10350	10350	MS2	17/35	120406QEx1_Gregan_Cipak_Sfr1_try_10%.raw
	High	LFKsPISNcLNPK	Unambiguous	1	1	SPBC28F2.07	S4(Phospho); C9(Carbamidomethyl)	HCD	1	0	1	1	1	S(4): 100.0; S(7): 0.0	217.406	132	3.43234	0	1	14.9316	41	3	533.265	1597.78	-0.80182	42.5697	10368	10368	MS2	12/70	120406QEx1_Gregan_Cipak_Sfr1_try_10%.raw
	High	LFKsPISNcLNPK	Unambiguous	1	1	SPBC28F2.07	S4(Phospho); C9(Carbamidomethyl)	HCD	1	0	1	1	1	S(4): 100.0; S(7): 0.0	324.333	108	3.3757	0	1	9.90785	250	2	799.394	1597.78	-0.182205	42.9874	10481	10481	MS2	15/35	120406QEx1_Gregan_Cipak_Sfr1_try_10%.raw
	High	LFKSPISNcLNPK	Unambiguous	1	1	SPBC28F2.07	C9(Carbamidomethyl)	HCD	1	0	1	1				52	3.13021	0	1	56.2791	91	3	506.61	1517.81	0.276543	39.7109	9558	9558	MS2	12/48	120406QEx1_Gregan_Cipak_Sfr1_try_10%.raw
	High	LFKSPISNcLNPK	Unambiguous	1	1	SPBC28F2.07	C9(Carbamidomethyl)	HCD	1	0	1	1				46	3.49986	0	1	21.629	250	2	759.41	1517.81	-1.22257	39.7234	9562	9562	MS2	14/24	120406QEx1_Gregan_Cipak_Sfr1_try_10%.raw
	High	NAAQQAAEVLFKPmAER	Unambiguous	2	1	SPBC28F2.07	M14(Oxidation)	HCD	1	0	1	1				107	4.90755	0	0	0	59	3	630.656	1889.95	-0.529795	45.9943	11312	11312	MS2	23/64	120406QEx1_Gregan_Cipak_Sfr1_try_10%.raw
	High	NAAQQAAEVLFKPmAER	Unambiguous	2	1	SPBC28F2.07	M14(Oxidation)	HCD	1	0	1	1				81	4.76025	0	0	0	250	2	945.483	1889.96	2.19005	46.009	11317	11317	MS2	18/32	120406QEx1_Gregan_Cipak_Sfr1_try_10%.raw
	High	NAAQQAAEVLFKPmAER	Unambiguous	2	1	SPBC28F2.07	M14(Oxidation)	HCD	1	0	1	1				116	3.71769	0	0	28.8725	28	4	473.243	1889.95	-0.989034	46.3084	11404	11404	MS2	18/96	120406QEx1_Gregan_Cipak_Sfr1_try_10%.raw
	High	NAAQQAAEVLFKPmAER	Unambiguous	2	1	SPBC28F2.07	M14(Oxidation)	HCD	1	0	1	1				94	4.14518	0	0	0.156585	1	3	630.657	1889.96	1.11722	46.3536	11416	11416	MS2	20/64	120406QEx1_Gregan_Cipak_Sfr1_try_10%.raw
	High	NAAQQAAEVLFKPmAER	Unambiguous	2	1	SPBC28F2.07	M14(Oxidation)	HCD	1	0	1	1				70	4.35819	0	0	0	5	2	945.48	1889.95	-0.328913	46.3549	11417	11417	MS2	18/32	120406QEx1_Gregan_Cipak_Sfr1_try_10%.raw
	High	NAAQQAAEVLFKPmAER	Unambiguous	2	1	SPBC28F2.07	M14(Oxidation)	HCD	1	0	1	1				108	4.13349	0	0	7.88282	15	3	630.656	1889.95	-0.336028	46.6897	11514	11514	MS2	21/64	120406QEx1_Gregan_Cipak_Sfr1_try_10%.raw
	High	NAAQQAAEVLFKPmAER	Unambiguous	2	1	SPBC28F2.07	M14(Oxidation)	HCD	1	0	1	1				68	4.40723	0	0	7.83927	250	2	945.479	1889.95	-1.81446	46.8144	11548	11548	MS2	16/32	120406QEx1_Gregan_Cipak_Sfr1_try_10%.raw
	High	NAAQQAAEVLFKPmAER	Unambiguous	2	1	SPBC28F2.07	M14(Oxidation)	HCD	1	0	1	1				104	4.82194	0	0	0.539339	39	3	630.656	1889.95	-0.142261	47.0366	11607	11607	MS2	23/64	120406QEx1_Gregan_Cipak_Sfr1_try_10%.raw
	High	NAAQQAAEVLFKPmAER	Unambiguous	2	1	SPBC28F2.07	M14(Oxidation)	HCD	1	0	1	1				84	4.60306	0	0	12.5034	250	2	945.48	1889.95	-0.264324	47.2197	11658	11658	MS2	19/32	120406QEx1_Gregan_Cipak_Sfr1_try_10%.raw
	High	NAAQQAAEVLFKPmAER	Unambiguous	2	1	SPBC28F2.07	M14(Oxidation)	HCD	1	0	1	1				108	4.77408	0	0	23.4943	15	3	630.656	1889.95	0.535924	47.4259	11711	11711	MS2	19/64	120406QEx1_Gregan_Cipak_Sfr1_try_10%.raw
	High	NAAQQAAEVLFKPmAER	Unambiguous	2	1	SPBC28F2.07	M14(Oxidation)	HCD	1	0	1	1				87	4.5678	0	0	19.2251	190	2	945.48	1889.95	-0.328913	47.5916	11757	11757	MS2	18/32	120406QEx1_Gregan_Cipak_Sfr1_try_10%.raw
	High	NAAQQAAEVLFKPmAER	Unambiguous	2	1	SPBC28F2.07	M14(Oxidation)	HCD	1	0	1	1				107	4.68122	0	0	4.19303	18	3	630.656	1889.95	-0.142261	47.7851	11813	11813	MS2	21/64	120406QEx1_Gregan_Cipak_Sfr1_try_10%.raw
	High	NAAQQAAEVLFKPmAER	Unambiguous	2	1	SPBC28F2.07	M14(Oxidation)	HCD	1	0	1	1				87	4.76037	0	0	0	250	2	945.48	1889.95	-0.199735	47.9383	11857	11857	MS2	18/32	120406QEx1_Gregan_Cipak_Sfr1_try_10%.raw
	High	NAAQQAAEVLFKPmAER	Unambiguous	2	1	SPBC28F2.07	M14(Oxidation)	HCD	1	0	1	1				102	4.18366	0	0	0	29	3	630.656	1889.95	-0.142261	48.1452	11922	11922	MS2	22/64	120406QEx1_Gregan_Cipak_Sfr1_try_10%.raw
	High	NAAQQAAEVLFKPmAER	Unambiguous	2	1	SPBC28F2.07	M14(Oxidation)	HCD	1	0	1	1				83	4.59479	0	0	0	177	2	945.481	1889.96	0.639922	48.2978	11961	11961	MS2	18/32	120406QEx1_Gregan_Cipak_Sfr1_try_10%.raw
	High	NAAQQAAEVLFKPmAER	Unambiguous	2	1	SPBC28F2.07	M14(Oxidation)	HCD	1	0	1	1				110	4.43227	0	0	20.326	19	3	630.656	1889.95	-0.239144	48.4948	12016	12016	MS2	21/64	120406QEx1_Gregan_Cipak_Sfr1_try_10%.raw
	High	NAAQQAAEVLFKPmAER	Unambiguous	2	1	SPBC28F2.07	M14(Oxidation)	HCD	1	0	1	1				86	4.24011	0	0	4.78283	250	2	945.48	1889.95	-0.781037	48.6621	12059	12059	MS2	17/32	120406QEx1_Gregan_Cipak_Sfr1_try_10%.raw
	High	NAAQQAAEVLFKPmAER	Unambiguous	2	1	SPBC28F2.07	M14(Oxidation)	HCD	1	0	1	1				107	4.28788	0	0	3.20646	37	3	630.656	1889.95	-0.142261	48.879	12113	12113	MS2	19/64	120406QEx1_Gregan_Cipak_Sfr1_try_10%.raw
	High	NAAQQAAEVLFKPmAER	Unambiguous	2	1	SPBC28F2.07	M14(Oxidation)	HCD	1	0	1	1				107	4.65923	0	0	6.20203	70	3	630.656	1889.95	-0.336028	49.2519	12213	12213	MS2	21/64	120406QEx1_Gregan_Cipak_Sfr1_try_10%.raw
	High	NAAQQAAEVLFKPmAER	Unambiguous	2	1	SPBC28F2.07	M14(Oxidation)	HCD	1	0	1	1				96	4.55013	0	0	0	45	3	630.657	1889.96	1.69852	49.5935	12303	12303	MS2	22/64	120406QEx1_Gregan_Cipak_Sfr1_try_10%.raw
	High	NAAQQAAEVLFKPmAER	Unambiguous	2	1	SPBC28F2.07	M14(Oxidation)	HCD	1	0	1	1				90	4.45056	0	0	0	250	2	945.48	1889.95	-0.393502	49.6448	12315	12315	MS2	19/32	120406QEx1_Gregan_Cipak_Sfr1_try_10%.raw
	High	NAAQQAAEVLFKPmAER	Unambiguous	2	1	SPBC28F2.07	M14(Oxidation)	HCD	1	0	1	1				111	4.39726	0	0	0	73	3	630.656	1889.95	-0.91733	49.9699	12398	12398	MS2	19/64	120406QEx1_Gregan_Cipak_Sfr1_try_10%.raw
	High	NAAQQAAEVLFKPmAER	Unambiguous	2	1	SPBC28F2.07	M14(Oxidation)	HCD	1	0	1	1				89	4.08347	0	0	0	250	2	945.481	1889.95	0.446155	50.2868	12484	12484	MS2	16/32	120406QEx1_Gregan_Cipak_Sfr1_try_10%.raw
	High	NAAQQAAEVLFKPmAER	Unambiguous	2	1	SPBC28F2.07	M14(Oxidation)	HCD	1	0	1	1				100	4.63667	0	0	1.10453	40	3	630.656	1889.95	-0.142261	50.3454	12498	12498	MS2	18/64	120406QEx1_Gregan_Cipak_Sfr1_try_10%.raw
	High	NAAQQAAEVLFKPmAER	Unambiguous	2	1	SPBC28F2.07	M14(Oxidation)	HCD	1	0	1	1				108	4.30409	0	0	2.95026	49	3	630.656	1889.95	-0.820446	50.6999	12600	12600	MS2	19/64	120406QEx1_Gregan_Cipak_Sfr1_try_10%.raw
	High	NAAQQAAEVLFKPmAER	Unambiguous	2	1	SPBC28F2.07	M14(Oxidation)	HCD	1	0	1	1				104	3.78508	0	0	91.1099	250	2	945.484	1889.96	3.67559	50.7734	12621	12621	MS2	14/32	120406QEx1_Gregan_Cipak_Sfr1_try_10%.raw
	High	NAAQQAAEVLFKPmAER	Unambiguous	2	1	SPBC28F2.07	M14(Oxidation)	HCD	1	0	1	1				86	4.44561	0	0	0	250	2	945.482	1889.96	1.86711	51.4703	12820	12820	MS2	18/32	120406QEx1_Gregan_Cipak_Sfr1_try_10%.raw
	High	NAAQQAAEVLFKPMAER	Unambiguous	2	1	SPBC28F2.07		HCD	1	0	1	1				71	5.18859	0	0	6.92459	163	3	625.328	1873.97	5.67637	49.5761	12298	12298	MS2	21/64	120406QEx1_Gregan_Cipak_Sfr1_try_10%.raw
	High	NAAQQAAEVLFKPMAER	Unambiguous	2	1	SPBC28F2.07		HCD	1	0	1	1				96	5.35162	0	0	6.05357	21	3	625.324	1873.96	-0.674781	51.5885	12856	12856	MS2	23/64	120406QEx1_Gregan_Cipak_Sfr1_try_10%.raw
	High	NAAQQAAEVLFKPMAER	Unambiguous	2	1	SPBC28F2.07		HCD	1	0	1	1				92	5.731	0	0	12.686	222	2	937.48	1873.95	-3.50122	51.6075	12862	12862	MS2	19/32	120406QEx1_Gregan_Cipak_Sfr1_try_10%.raw
	High	NAAQQAAEVLFKPMAER	Unambiguous	2	1	SPBC28F2.07		HCD	1	0	1	1				93	3.66962	0	0	36.2533	9	4	469.245	1873.96	-0.649386	51.7877	12913	12913	MS2	22/96	120406QEx1_Gregan_Cipak_Sfr1_try_10%.raw
	High	NAAQQAAEVLFKPMAER	Unambiguous	2	1	SPBC28F2.07		HCD	1	0	1	1				83	4.54621	0	0	0.144994	0	3	625.325	1873.96	0.888587	51.9338	12954	12954	MS2	24/64	120406QEx1_Gregan_Cipak_Sfr1_try_10%.raw
	High	NAAQQAAEVLFKPMAER	Unambiguous	2	1	SPBC28F2.07		HCD	1	0	1	1				88	5.65916	0	0	0.272546	1	2	937.48	1873.95	-2.84981	51.9432	12957	12957	MS2	20/32	120406QEx1_Gregan_Cipak_Sfr1_try_10%.raw
	High	NAAQQAAEVLFKPMAER	Unambiguous	2	1	SPBC28F2.07		HCD	1	0	1	1				95	4.68557	0	0	0.144974	3	3	625.324	1873.96	-0.0885175	52.2871	13054	13054	MS2	23/64	120406QEx1_Gregan_Cipak_Sfr1_try_10%.raw
	High	NAAQQAAEVLFKPMAER	Unambiguous	2	1	SPBC28F2.07		HCD	1	0	1	1				94	5.04259	0	0	0	26	2	937.483	1873.96	-0.309333	52.2909	13057	13057	MS2	20/32	120406QEx1_Gregan_Cipak_Sfr1_try_10%.raw
	High	NAAQQAAEVLFKPMAER	Unambiguous	2	1	SPBC28F2.07		HCD	1	0	1	1				95	4.99741	0	0	0.250509	12	3	625.324	1873.96	-0.0885175	52.6484	13154	13154	MS2	23/64	120406QEx1_Gregan_Cipak_Sfr1_try_10%.raw
	High	NAAQQAAEVLFKPMAER	Unambiguous	2	1	SPBC28F2.07		HCD	1	0	1	1				94	5.40477	0	0	0	124	2	937.483	1873.96	-0.0487719	52.6551	13157	13157	MS2	20/32	120406QEx1_Gregan_Cipak_Sfr1_try_10%.raw
	High	NAAQQAAEVLFKPMAER	Unambiguous	2	1	SPBC28F2.07		HCD	1	0	1	1				98	5.30447	0	0	9.13075	27	3	625.324	1873.96	-0.283939	53.0253	13259	13259	MS2	24/64	120406QEx1_Gregan_Cipak_Sfr1_try_10%.raw
	High	NAAQQAAEVLFKPMAER	Unambiguous	2	1	SPBC28F2.07		HCD	1	0	1	1				92	5.65312	0	0	4.45407	250	2	937.482	1873.96	-1.09102	53.033	13261	13261	MS2	20/32	120406QEx1_Gregan_Cipak_Sfr1_try_10%.raw
	High	NAAQQAAEVLFKPMAER	Unambiguous	2	1	SPBC28F2.07		HCD	1	0	1	1				95	5.08158	0	0	5.33759	30	3	625.324	1873.96	-0.186228	53.3915	13357	13357	MS2	23/64	120406QEx1_Gregan_Cipak_Sfr1_try_10%.raw
	High	NAAQQAAEVLFKPMAER	Unambiguous	2	1	SPBC28F2.07		HCD	1	0	1	1				84	5.46635	0	0	0	250	2	937.482	1873.96	-0.830457	53.401	13359	13359	MS2	21/32	120406QEx1_Gregan_Cipak_Sfr1_try_10%.raw
	High	NAAQQAAEVLFKPMAER	Unambiguous	2	1	SPBC28F2.07		HCD	1	0	1	1				95	4.96203	0	0	15.044	39	3	625.325	1873.96	0.106904	53.7435	13441	13441	MS2	21/64	120406QEx1_Gregan_Cipak_Sfr1_try_10%.raw
	High	NAAQQAAEVLFKPMAER	Unambiguous	2	1	SPBC28F2.07		HCD	1	0	1	1				103	5.12496	0	0	22.2767	250	2	937.482	1873.96	-1.2213	53.7483	13442	13442	MS2	18/32	120406QEx1_Gregan_Cipak_Sfr1_try_10%.raw
	High	NAAQQAAEVLFKPMAER	Unambiguous	2	1	SPBC28F2.07		HCD	1	0	1	1				94	4.64625	0	0	21.2786	250	2	937.483	1873.96	0.0815087	54.5206	13645	13645	MS2	16/32	120406QEx1_Gregan_Cipak_Sfr1_try_10%.raw
	High	NAAQQAAEVLFKPMAER	Unambiguous	2	1	SPBC28F2.07		HCD	1	0	1	1				93	5.25928	0	0	9.99567	77	3	625.324	1873.96	-0.57707	54.5716	13661	13661	MS2	23/64	120406QEx1_Gregan_Cipak_Sfr1_try_10%.raw
	High	NAAQQAAEVLFKPMAER	Unambiguous	2	1	SPBC28F2.07		HCD	1	0	1	1				98	5.27803	0	0	4.03664	115	3	625.324	1873.96	-0.381649	55.3252	13852	13852	MS2	22/64	120406QEx1_Gregan_Cipak_Sfr1_try_10%.raw
	High	NAAQQAAEVLFKPMAER	Unambiguous	2	1	SPBC28F2.07		HCD	1	0	1	1				94	5.42519	0	0	7.95545	250	3	625.323	1873.95	-3.01984	55.8119	13974	13974	MS2	20/64	120406QEx1_Gregan_Cipak_Sfr1_try_10%.raw
	High	NAAQQAAEVLFKPMAER	Unambiguous	2	1	SPBC28F2.07		HCD	1	0	1	1				99	5.42447	0	0	12.5495	250	3	625.324	1873.96	-0.870202	56.3994	14122	14122	MS2	20/64	120406QEx1_Gregan_Cipak_Sfr1_try_10%.raw
	High	NAAQQAAEVLFKPMAER	Unambiguous	2	1	SPBC28F2.07		HCD	1	0	1	1				106	4.74348	0	0	54.5229	250	3	625.325	1873.96	0.00919302	57.0485	14281	14281	MS2	17/64	120406QEx1_Gregan_Cipak_Sfr1_try_10%.raw
	High	NAAQQAAEVLFKPMAER	Unambiguous	2	1	SPBC28F2.07		HCD	1	0	1	1				93	4.46313	0	0	8.76132	250	3	625.324	1873.96	-0.47936	59.3106	14825	14825	MS2	18/64	120406QEx1_Gregan_Cipak_Sfr1_try_10%.raw
	High	NAAQQAAEVLFKPMAER	Unambiguous	2	1	SPBC28F2.07		HCD	1	0	1	1				98	3.7262	0	0	32.5315	250	3	625.326	1873.96	1.67027	62.1936	15501	15501	MS2	16/64	120406QEx1_Gregan_Cipak_Sfr1_try_10%.raw
	High	NAAQQAAEVLFKPMAER	Unambiguous	2	1	SPBC28F2.07		HCD	1	0	1	1				88	3.1989	0	0	12.8732	250	3	625.325	1873.96	1.37714	66.2522	16428	16428	MS2	15/64	120406QEx1_Gregan_Cipak_Sfr1_try_10%.raw
	High	NAAQQAAEVLFKPMAER	Unambiguous	2	1	SPBC28F2.07		HCD	1	0	1	1				91	3.51679	0	0	55.3554	250	3	625.326	1873.96	1.57256	67.1921	16635	16635	MS2	16/64	120406QEx1_Gregan_Cipak_Sfr1_try_10%.raw
	High	NAAQQAAEVLFKPMAER	Unambiguous	2	1	SPBC28F2.07		HCD	1	0	1	1				96	2.91991	0	0	31.5704	250	3	625.324	1873.96	-1.16333	68.6131	16954	16954	MS2	15/64	120406QEx1_Gregan_Cipak_Sfr1_try_10%.raw
	High	NEDKDLQTLIQK	Unambiguous	2	1	SPBC28F2.07		HCD	1	0	1	1				89	2.33053	0	1	0	250	2	722.886	1444.76	0.0474301	28.4013	6557	6557	MS2	10/22	120406QEx1_Gregan_Cipak_Sfr1_try_10%.raw
	High	NEDKDLQTLIQK	Unambiguous	2	1	SPBC28F2.07		HCD	1	0	1	1				85	3.34564	0	1	23.3022	115	2	722.885	1444.76	-0.881977	37.6886	8996	8996	MS2	14/22	120406QEx1_Gregan_Cipak_Sfr1_try_10%.raw
	High	NEDKDLQTLIQK	Unambiguous	2	1	SPBC28F2.07		HCD	1	0	1	1				82	5.51932	0	1	8.02846	250	2	722.885	1444.76	-0.459519	38.108	9110	9110	MS2	17/22	120406QEx1_Gregan_Cipak_Sfr1_try_10%.raw
	High	NEDKDLQTLIQK	Unambiguous	2	1	SPBC28F2.07		HCD	1	0	1	1				87	3.66705	0	1	11.2364	165	3	482.26	1444.76	0.0803689	38.1209	9114	9114	MS2	12/44	120406QEx1_Gregan_Cipak_Sfr1_try_10%.raw
	High	NEDKDLQTLIQK	Unambiguous	2	1	SPBC28F2.07		HCD	1	0	1	1				78	5.28166	0	1	0.122511	0	2	722.886	1444.76	0.216413	38.4487	9205	9205	MS2	18/22	120406QEx1_Gregan_Cipak_Sfr1_try_10%.raw
	High	NEDKDLQTLIQK	Unambiguous	2	1	SPBC28F2.07		HCD	1	0	1	1				77	2.61678	0	1	0.220327	0	3	482.26	1444.77	1.28437	38.471	9211	9211	MS2	12/44	120406QEx1_Gregan_Cipak_Sfr1_try_10%.raw
	High	NEDKDLQTLIQK	Unambiguous	2	1	SPBC28F2.07		HCD	1	0	1	1				81	4.86476	0	1	7.66342	8	2	722.886	1444.76	-0.290536	38.7968	9302	9302	MS2	17/22	120406QEx1_Gregan_Cipak_Sfr1_try_10%.raw
	Medium	NEDKDLQTLIQK	Unambiguous	2	1	SPBC28F2.07		HCD	1	0	1	1				78	2.59781	0	1	1.1492	7	3	482.26	1444.76	-0.109737	38.8215	9308	9308	MS2	11/44	120406QEx1_Gregan_Cipak_Sfr1_try_10%.raw
	High	NEDKDLQTLIQK	Unambiguous	2	1	SPBC28F2.07		HCD	1	0	1	1				85	4.92509	0	1	0	17	2	722.885	1444.76	-0.375028	39.1338	9395	9395	MS2	17/22	120406QEx1_Gregan_Cipak_Sfr1_try_10%.raw
	Medium	NEDKDLQTLIQK	Unambiguous	2	1	SPBC28F2.07		HCD	1	0	1	1				85	2.19511	0	1	0	13	3	482.26	1444.76	0.270475	39.1706	9406	9406	MS2	10/44	120406QEx1_Gregan_Cipak_Sfr1_try_10%.raw
	High	NEDKDLQTLIQK	Unambiguous	2	1	SPBC28F2.07		HCD	1	0	1	1				80	4.73838	0	1	0	30	2	722.885	1444.76	-0.375028	39.4837	9493	9493	MS2	18/22	120406QEx1_Gregan_Cipak_Sfr1_try_10%.raw
	High	NEDKDLQTLIQK	Unambiguous	2	1	SPBC28F2.07		HCD	1	0	1	1				79	2.93508	0	1	0	29	3	482.26	1444.77	1.41111	39.5166	9503	9503	MS2	11/44	120406QEx1_Gregan_Cipak_Sfr1_try_10%.raw
	High	NEDKDLQTLIQK	Unambiguous	2	1	SPBC28F2.07		HCD	1	0	1	1				78	2.69632	0	1	6.42304	36	3	482.259	1444.76	-0.236474	39.8627	9599	9599	MS2	12/44	120406QEx1_Gregan_Cipak_Sfr1_try_10%.raw
	High	NEDKDLQTLIQK	Unambiguous	2	1	SPBC28F2.07		HCD	1	0	1	1				78	4.7699	0	1	3.10428	42	2	722.885	1444.76	-0.628502	39.864	9600	9600	MS2	18/22	120406QEx1_Gregan_Cipak_Sfr1_try_10%.raw
	High	NEDKDLQTLIQK	Unambiguous	2	1	SPBC28F2.07		HCD	1	0	1	1				83	5.07239	0	1	3.34971	53	2	722.885	1444.76	-0.966469	40.2464	9712	9712	MS2	17/22	120406QEx1_Gregan_Cipak_Sfr1_try_10%.raw
	Medium	NEDKDLQTLIQK	Unambiguous	2	1	SPBC28F2.07		HCD	1	0	1	1				92	2.2985	0	1	19.8164	56	3	482.261	1444.77	2.99532	40.5872	9809	9809	MS2	10/44	120406QEx1_Gregan_Cipak_Sfr1_try_10%.raw
	High	NEDKDLQTLIQK	Unambiguous	2	1	SPBC28F2.07		HCD	1	0	1	1				94	5.13737	0	1	40.7555	106	2	722.886	1444.76	0.216413	41.3051	10009	10009	MS2	15/22	120406QEx1_Gregan_Cipak_Sfr1_try_10%.raw
	Medium	NEDKDLQTLIQK	Unambiguous	2	1	SPBC28F2.07		HCD	1	0	1	1				88	2.28971	0	1	22.1862	83	3	482.26	1444.76	0.207106	41.3325	10017	10017	MS2	11/44	120406QEx1_Gregan_Cipak_Sfr1_try_10%.raw
	High	NEDKDLQTLIQK	Unambiguous	2	1	SPBC28F2.07		HCD	1	0	1	1				84	4.63985	0	1	5.09964	164	2	722.886	1444.76	-0.121553	41.6973	10119	10119	MS2	16/22	120406QEx1_Gregan_Cipak_Sfr1_try_10%.raw
	Medium	NEDKDLQTLIQK	Unambiguous	2	1	SPBC28F2.07		HCD	1	0	1	1				87	2.50469	0	1	2.24343	152	3	482.26	1444.76	0.207106	41.7004	10120	10120	MS2	10/44	120406QEx1_Gregan_Cipak_Sfr1_try_10%.raw
	High	NEDKDLQTLIQK	Unambiguous	2	1	SPBC28F2.07		HCD	1	0	1	1				95	4.53379	0	1	17.9985	250	2	722.885	1444.76	-1.05096	42.8754	10451	10451	MS2	17/22	120406QEx1_Gregan_Cipak_Sfr1_try_10%.raw
	High	NEDKDLQTLIQK	Unambiguous	2	1	SPBC28F2.07		HCD	1	0	1	1				91	2.76472	0	1	27.3374	221	3	482.26	1444.76	0.270475	42.9546	10472	10472	MS2	12/44	120406QEx1_Gregan_Cipak_Sfr1_try_10%.raw
	High	NEDKDLQTLIQK	Unambiguous	2	1	SPBC28F2.07		HCD	1	0	1	1				88	4.20953	0	1	45.2579	250	2	722.888	1444.77	3.17361	43.2405	10553	10553	MS2	15/22	120406QEx1_Gregan_Cipak_Sfr1_try_10%.raw
	High	NEDKDLQTLIQK	Unambiguous	2	1	SPBC28F2.07		HCD	1	0	1	1				90	3.7786	0	1	24.4691	250	2	722.885	1444.76	-1.05096	43.6529	10667	10667	MS2	17/22	120406QEx1_Gregan_Cipak_Sfr1_try_10%.raw
	High	NEDKDLQTLIQK	Unambiguous	2	1	SPBC28F2.07		HCD	1	0	1	1				95	3.5505	0	1	44.4701	250	2	722.886	1444.76	-0.290536	44.53	10908	10908	MS2	15/22	120406QEx1_Gregan_Cipak_Sfr1_try_10%.raw
	High	NEDKDLQTLIQKWK	Unambiguous	2	1	SPBC28F2.07		HCD	1	0	1	1				76	4.62059	0	2	42.3191	231	3	586.984	1758.94	-0.821174	48.6787	12063	12063	MS2	14/52	120406QEx1_Gregan_Cipak_Sfr1_try_10%.raw
	High	NILLKPFK	Unambiguous	2	1	SPBC28F2.07		HCD	1	0	1	1				13	2.46606	0	0	35.6235	250	2	486.815	972.624	-0.480669	39.2118	9420	9420	MS2	9/14	120406QEx1_Gregan_Cipak_Sfr1_try_10%.raw
	Medium	NILLKPFK	Unambiguous	2	1	SPBC28F2.07		HCD	1	0	1	1				12	2.16231	0	0	0.50329	0	2	486.816	972.625	1.0254	39.5608	9514	9514	MS2	8/14	120406QEx1_Gregan_Cipak_Sfr1_try_10%.raw
	Medium	NILLKPFK	Unambiguous	2	1	SPBC28F2.07		HCD	1	0	1	1				12	2.15245	0	0	3.0722	7	2	486.816	972.624	-0.10415	39.9376	9621	9621	MS2	8/14	120406QEx1_Gregan_Cipak_Sfr1_try_10%.raw
	Medium	NILLKPFK	Unambiguous	2	1	SPBC28F2.07		HCD	1	0	1	1				13	2.24311	0	0	23.0737	22	2	486.815	972.624	-0.480669	40.2841	9722	9722	MS2	9/14	120406QEx1_Gregan_Cipak_Sfr1_try_10%.raw
	Medium	NILLKPFK	Unambiguous	2	1	SPBC28F2.07		HCD	1	0	1	1				13	2.15418	0	0	21.797	45	2	486.816	972.624	-0.229656	40.6545	9829	9829	MS2	8/14	120406QEx1_Gregan_Cipak_Sfr1_try_10%.raw
	Low	NILLKPFK	Unconsidered	2	1	SPBC28F2.07		HCD	1	0	1	1				13	1.79911	0	0	29.1102	56	2	486.816	972.624	-0.041397	41.1451	9965	9965	MS2	8/14	120406QEx1_Gregan_Cipak_Sfr1_try_10%.raw
	Medium	NILLKPFK	Unambiguous	2	1	SPBC28F2.07		HCD	1	0	1	1				13	2.05168	0	0	46.0354	77	2	486.816	972.624	0.397874	41.7369	10131	10131	MS2	9/14	120406QEx1_Gregan_Cipak_Sfr1_try_10%.raw
	Low	NILLKPFK	Unconsidered	2	1	SPBC28F2.07		HCD	1	0	1	1				13	1.69427	0	0	59.7115	250	2	486.815	972.624	-0.543422	43.9069	10733	10733	MS2	9/14	120406QEx1_Gregan_Cipak_Sfr1_try_10%.raw
	Low	NILLKPFK	Unconsidered	2	1	SPBC28F2.07		HCD	1	0	1	1				13	1.81433	0	0	25.7626	250	2	486.816	972.625	0.837145	44.8033	10980	10980	MS2	9/14	120406QEx1_Gregan_Cipak_Sfr1_try_10%.raw
spectrum OK	High	NILLKPFKsPLR	Unambiguous	1	1	SPBC28F2.07	S9(Phospho)	HCD	1	0	1	1	1	S(9): 100.0	343.988	29	3.70983	0	1	35.8922	170	3	502.625	1505.86	0.374381	43.7382	10688	10688	MS2	17/64	120406QEx1_Gregan_Cipak_Sfr1_try_10%.raw
	High	NILLKPFKsPLR	Unambiguous	1	1	SPBC28F2.07	S9(Phospho)	HCD	1	0	1	1	1	S(9): 100.0	519.552	26	3.69258	0	1	0	250	2	753.433	1505.86	-1.1569	43.9146	10736	10736	MS2	18/32	120406QEx1_Gregan_Cipak_Sfr1_try_10%.raw
	Medium	NILLKPFKsPLR	Unambiguous	1	1	SPBC28F2.07	S9(Phospho)	HCD	1	0	1	1	1	S(9): 100.0	264.155	23	2.55313	0	1	6.93839	96	4	377.22	1505.86	-0.526247	43.9862	10760	10760	MS2	19/96	120406QEx1_Gregan_Cipak_Sfr1_try_10%.raw
	High	NILLKPFKsPLR	Unambiguous	1	1	SPBC28F2.07	S9(Phospho)	HCD	1	0	1	1	1	S(9): 100.0	458.482	26	3.33348	0	1	0.173687	0	3	502.626	1505.86	2.86708	44.0966	10793	10793	MS2	25/64	120406QEx1_Gregan_Cipak_Sfr1_try_10%.raw
	High	NILLKPFKsPLR	Unambiguous	1	1	SPBC28F2.07	S9(Phospho)	HCD	1	0	1	1	1	S(9): 100.0	489.276	25	3.25653	0	1	0	3	2	753.434	1505.86	-0.427324	44.2983	10842	10842	MS2	17/32	120406QEx1_Gregan_Cipak_Sfr1_try_10%.raw
	High	NILLKPFKsPLR	Unambiguous	1	1	SPBC28F2.07	S9(Phospho)	HCD	1	0	1	1	1	S(9): 100.0	438.667	25	3.43061	0	1	1.62278	5	3	502.625	1505.86	0.435179	44.4394	10886	10886	MS2	26/64	120406QEx1_Gregan_Cipak_Sfr1_try_10%.raw
	High	NILLKPFKsPLR	Unambiguous	1	1	SPBC28F2.07	S9(Phospho)	HCD	1	0	1	1	1	S(9): 100.0	488.909	25	3.25263	0	1	14.257	28	2	753.433	1505.86	-0.832642	44.6539	10941	10941	MS2	16/32	120406QEx1_Gregan_Cipak_Sfr1_try_10%.raw
	High	NILLKPFKsPLR	Unambiguous	1	1	SPBC28F2.07	S9(Phospho)	HCD	1	0	1	1	1	S(9): 100.0	365.667	37	2.82245	0	1	30.4456	14	3	502.624	1505.86	-1.32795	44.7958	10977	10977	MS2	20/64	120406QEx1_Gregan_Cipak_Sfr1_try_10%.raw
	High	NILLKPFKsPLR	Unambiguous	1	1	SPBC28F2.07	S9(Phospho)	HCD	1	0	1	1	1	S(9): 100.0	477.767	25	3.23964	0	1	0	77	2	753.434	1505.86	-0.184134	45.0194	11039	11039	MS2	14/32	120406QEx1_Gregan_Cipak_Sfr1_try_10%.raw
	High	NILLKPFKsPLR	Unambiguous	1	1	SPBC28F2.07	S9(Phospho)	HCD	1	0	1	1	1	S(9): 100.0	421.981	27	3.2135	0	1	19.9488	54	3	502.625	1505.86	0.131191	45.1631	11080	11080	MS2	23/64	120406QEx1_Gregan_Cipak_Sfr1_try_10%.raw
	High	NILLKPFKsPLR	Unambiguous	1	1	SPBC28F2.07	S9(Phospho)	HCD	1	0	1	1	1	S(9): 100.0	483.693	25	3.55286	0	1	0	174	2	753.433	1505.86	-0.589451	45.3949	11146	11146	MS2	17/32	120406QEx1_Gregan_Cipak_Sfr1_try_10%.raw
	High	NILLKPFKsPLR	Unambiguous	1	1	SPBC28F2.07	S9(Phospho)	HCD	1	0	1	1	1	S(9): 100.0	469.377	29	3.44647	0	1	15.8225	92	3	502.625	1505.86	-0.294392	45.513	11178	11178	MS2	25/64	120406QEx1_Gregan_Cipak_Sfr1_try_10%.raw
	High	NILLKPFKsPLR	Unambiguous	1	1	SPBC28F2.07	S9(Phospho)	HCD	1	0	1	1	1	S(9): 100.0	435.568	29	3.49616	0	1	42.7081	250	2	753.434	1505.86	0.707564	45.7624	11245	11245	MS2	16/32	120406QEx1_Gregan_Cipak_Sfr1_try_10%.raw
	High	NILLKPFKsPLR	Unambiguous	1	1	SPBC28F2.07	S9(Phospho)	HCD	1	0	1	1	1	S(9): 100.0	413.331	27	3.37638	0	1	23.3663	81	3	502.625	1505.86	-0.0512018	45.888	11276	11276	MS2	24/64	120406QEx1_Gregan_Cipak_Sfr1_try_10%.raw
	Medium	NILLKPFKsPLR	Unambiguous	1	1	SPBC28F2.07	S9(Phospho)	HCD	1	0	1	1	1	S(9): 100.0	244.721	28	2.3698	0	1	42.0085	165	3	502.625	1505.86	0.313584	47.1979	11652	11652	MS2	15/64	120406QEx1_Gregan_Cipak_Sfr1_try_10%.raw
	High	NILLKPFKSPLR	Unambiguous	1	1	SPBC28F2.07		HCD	1	0	1	1				3	3.0841	0	1	11.0775	109	3	475.97	1425.89	0.111457	41.4294	10043	10043	MS2	18/44	120406QEx1_Gregan_Cipak_Sfr1_try_10%.raw
	High	NILLKPFKSPLR	Unambiguous	1	1	SPBC28F2.07		HCD	1	0	1	1				3	3.14455	0	1	8.48175	151	4	357.229	1425.89	-0.283216	41.5371	10075	10075	MS2	16/66	120406QEx1_Gregan_Cipak_Sfr1_try_10%.raw
	High	NILLKPFKSPLR	Unambiguous	1	1	SPBC28F2.07		HCD	1	0	1	1				3	3.11838	0	1	4.25634	35	3	475.97	1425.89	0.239872	41.7876	10148	10148	MS2	14/44	120406QEx1_Gregan_Cipak_Sfr1_try_10%.raw
	High	NLQEQLITAETAR	Unambiguous	2	1	SPBC28F2.07		HCD	1	0	1	1				70	3.22263	0	0	17.1456	154	3	496.267	1486.79	-0.236819	39.8266	9590	9590	MS2	13/48	120406QEx1_Gregan_Cipak_Sfr1_try_10%.raw
	High	NLQEQLITAETAR	Unambiguous	2	1	SPBC28F2.07		HCD	1	0	1	1				60	3.90008	0	0	4.68514	250	2	743.896	1486.79	-0.248301	39.9252	9617	9617	MS2	15/24	120406QEx1_Gregan_Cipak_Sfr1_try_10%.raw
	High	NLQEQLITAETAR	Unambiguous	2	1	SPBC28F2.07		HCD	1	0	1	1				76	4.22294	0	0	18.9759	214	2	743.895	1486.78	-1.72617	44.9878	11030	11030	MS2	14/24	120406QEx1_Gregan_Cipak_Sfr1_try_10%.raw
	High	NLQEQLITAETAR	Unambiguous	2	1	SPBC28F2.07		HCD	1	0	1	1				70	3.74122	0	0	41.5713	210	3	496.267	1486.79	0.194224	45.0369	11045	11045	MS2	13/48	120406QEx1_Gregan_Cipak_Sfr1_try_10%.raw
	High	NLQEQLITAETAR	Unambiguous	2	1	SPBC28F2.07		HCD	1	0	1	1				61	4.50265	0	0	10.1872	112	2	743.896	1486.79	-0.330404	46.3628	11421	11421	MS2	17/24	120406QEx1_Gregan_Cipak_Sfr1_try_10%.raw
	High	NLQEQLITAETAR	Unambiguous	2	1	SPBC28F2.07		HCD	1	0	1	1				61	4.36741	0	0	5.59803	23	3	496.267	1486.79	-0.113664	46.3903	11429	11429	MS2	16/48	120406QEx1_Gregan_Cipak_Sfr1_try_10%.raw
	High	NLQEQLITAETAR	Unambiguous	2	1	SPBC28F2.07		HCD	1	0	1	1				64	4.02703	0	0	0.0906579	0	2	743.897	1486.79	0.654837	46.7014	11517	11517	MS2	16/24	120406QEx1_Gregan_Cipak_Sfr1_try_10%.raw
	High	NLQEQLITAETAR	Unambiguous	2	1	SPBC28F2.07		HCD	1	0	1	1				62	3.67721	0	0	0.0508157	1	3	496.267	1486.79	0.686845	46.7416	11527	11527	MS2	14/48	120406QEx1_Gregan_Cipak_Sfr1_try_10%.raw
	High	NLQEQLITAETAR	Unambiguous	2	1	SPBC28F2.07		HCD	1	0	1	1				61	4.03891	0	0	0.213051	3	2	743.897	1486.79	-0.166197	47.0633	11613	11613	MS2	16/24	120406QEx1_Gregan_Cipak_Sfr1_try_10%.raw
	High	NLQEQLITAETAR	Unambiguous	2	1	SPBC28F2.07		HCD	1	0	1	1				62	3.47129	0	0	0.137902	10	3	496.267	1486.79	0.132647	47.0991	11624	11624	MS2	16/48	120406QEx1_Gregan_Cipak_Sfr1_try_10%.raw
	High	NLQEQLITAETAR	Unambiguous	2	1	SPBC28F2.07		HCD	1	0	1	1				63	4.17621	0	0	3.9612	10	2	743.896	1486.79	-0.576715	47.4246	11710	11710	MS2	17/24	120406QEx1_Gregan_Cipak_Sfr1_try_10%.raw
	High	NLQEQLITAETAR	Unambiguous	2	1	SPBC28F2.07		HCD	1	0	1	1				58	3.53844	0	0	5.79275	29	3	496.267	1486.79	0.00949169	47.4606	11721	11721	MS2	17/48	120406QEx1_Gregan_Cipak_Sfr1_try_10%.raw
	High	NLQEQLITAETAR	Unambiguous	2	1	SPBC28F2.07		HCD	1	0	1	1				62	4.52349	0	0	16.8785	20	2	743.896	1486.79	-0.248301	47.7838	11812	11812	MS2	16/24	120406QEx1_Gregan_Cipak_Sfr1_try_10%.raw
	High	NLQEQLITAETAR	Unambiguous	2	1	SPBC28F2.07		HCD	1	0	1	1				60	3.24216	0	0	2.71859	55	3	496.267	1486.79	0.132647	47.8152	11823	11823	MS2	15/48	120406QEx1_Gregan_Cipak_Sfr1_try_10%.raw
	High	NLQEQLITAETAR	Unambiguous	2	1	SPBC28F2.07		HCD	1	0	1	1				71	3.98434	0	0	52.7184	22	2	743.896	1486.78	-0.740922	48.137	11920	11920	MS2	17/24	120406QEx1_Gregan_Cipak_Sfr1_try_10%.raw
	High	NLQEQLITAETAR	Unambiguous	2	1	SPBC28F2.07		HCD	1	0	1	1				69	3.39343	0	0	46.8594	53	3	496.267	1486.79	-0.236819	48.3599	11981	11981	MS2	15/48	120406QEx1_Gregan_Cipak_Sfr1_try_10%.raw
	High	NLQEQLITAETAR	Unambiguous	2	1	SPBC28F2.07		HCD	1	0	1	1				72	4.13292	0	0	14.3219	34	2	743.896	1486.79	-0.658819	48.4866	12013	12013	MS2	16/24	120406QEx1_Gregan_Cipak_Sfr1_try_10%.raw
	High	NLQEQLITAETAR	Unambiguous	2	1	SPBC28F2.07		HCD	1	0	1	1				71	3.58737	0	0	8.06823	104	3	496.267	1486.79	0.440535	48.7349	12078	12078	MS2	17/48	120406QEx1_Gregan_Cipak_Sfr1_try_10%.raw
	High	NLQEQLITAETAR	Unambiguous	2	1	SPBC28F2.07		HCD	1	0	1	1				63	4.15671	0	0	4.09977	44	2	743.896	1486.79	-0.494611	48.8778	12112	12112	MS2	16/24	120406QEx1_Gregan_Cipak_Sfr1_try_10%.raw
	High	NLQEQLITAETAR	Unambiguous	2	1	SPBC28F2.07		HCD	1	0	1	1				64	3.92913	0	0	4.31713	92	3	496.267	1486.79	-0.359974	49.0939	12174	12174	MS2	16/48	120406QEx1_Gregan_Cipak_Sfr1_try_10%.raw
	High	NLQEQLITAETAR	Unambiguous	2	1	SPBC28F2.07		HCD	1	0	1	1				76	4.22522	0	0	0	135	2	743.895	1486.78	-1.97248	49.2262	12207	12207	MS2	15/24	120406QEx1_Gregan_Cipak_Sfr1_try_10%.raw
	High	NLQEQLITAETAR	Unambiguous	2	1	SPBC28F2.07		HCD	1	0	1	1				77	4.27282	0	0	43.2364	58	2	743.895	1486.78	-2.62931	50.033	12413	12413	MS2	13/24	120406QEx1_Gregan_Cipak_Sfr1_try_10%.raw
	High	NLQEQLITAETAR	Unambiguous	2	1	SPBC28F2.07		HCD	1	0	1	1				72	2.87623	0	0	17.0389	250	3	496.267	1486.79	0.625267	50.3133	12491	12491	MS2	12/48	120406QEx1_Gregan_Cipak_Sfr1_try_10%.raw
	High	NLQEQLITAETAR	Unambiguous	2	1	SPBC28F2.07		HCD	1	0	1	1				79	3.89888	0	0	28.1052	89	2	743.895	1486.78	-2.4651	50.4866	12536	12536	MS2	13/24	120406QEx1_Gregan_Cipak_Sfr1_try_10%.raw
	High	NLQEQLITAETAR	Unambiguous	2	1	SPBC28F2.07		HCD	1	0	1	1				76	4.19455	0	0	0	191	2	743.895	1486.78	-1.89037	51.3535	12790	12790	MS2	14/24	120406QEx1_Gregan_Cipak_Sfr1_try_10%.raw
	High	NLQEQLITAETAR	Unambiguous	2	1	SPBC28F2.07		HCD	1	0	1	1				75	4.11403	0	0	26.9512	250	2	743.897	1486.79	0.654837	52.3904	13087	13087	MS2	14/24	120406QEx1_Gregan_Cipak_Sfr1_try_10%.raw
	High	NLQEQLITAETAR	Unambiguous	2	1	SPBC28F2.07		HCD	1	0	1	1				75	3.93137	0	0	39.0619	250	2	743.897	1486.79	0.408527	53.5283	13390	13390	MS2	14/24	120406QEx1_Gregan_Cipak_Sfr1_try_10%.raw
	High	NLQEQLITAETAR	Unambiguous	2	1	SPBC28F2.07		HCD	1	0	1	1				71	3.66922	0	0	0	250	2	743.896	1486.79	-0.658819	59.7963	14945	14945	MS2	12/24	120406QEx1_Gregan_Cipak_Sfr1_try_10%.raw
	High	NLQEQLITAETAR	Unambiguous	2	1	SPBC28F2.07		HCD	1	0	1	1				71	3.40758	0	0	66.8657	250	2	743.897	1486.79	-0.166197	62.2252	15508	15508	MS2	12/24	120406QEx1_Gregan_Cipak_Sfr1_try_10%.raw
	High	NLQEQLITAETAR	Unambiguous	2	1	SPBC28F2.07		HCD	1	0	1	1				75	3.56083	0	0	49.7621	250	2	743.896	1486.78	-1.47986	66.1732	16410	16410	MS2	13/24	120406QEx1_Gregan_Cipak_Sfr1_try_10%.raw
	High	NLQEQLITAETAR	Unambiguous	2	1	SPBC28F2.07		HCD	1	0	1	1				94	3.73126	0	0	13.2984	250	2	743.894	1486.78	-3.61456	67.1874	16634	16634	MS2	14/24	120406QEx1_Gregan_Cipak_Sfr1_try_10%.raw
	High	NLQEQLITAETAR	Unambiguous	2	1	SPBC28F2.07		HCD	1	0	1	1				79	3.65197	0	0	28.5012	250	2	743.895	1486.78	-2.4651	67.7522	16758	16758	MS2	14/24	120406QEx1_Gregan_Cipak_Sfr1_try_10%.raw
	High	NLQEQLITAETAR	Unambiguous	2	1	SPBC28F2.07		HCD	1	0	1	1				80	3.61649	0	0	28.5414	250	2	743.898	1486.79	1.64008	68.5205	16932	16932	MS2	13/24	120406QEx1_Gregan_Cipak_Sfr1_try_10%.raw
	High	NLQEQLITAETARK	Unambiguous	2	1	SPBC28F2.07		HCD	1	0	1	1				62	3.37946	0	1	45.3223	153	3	538.966	1614.88	0.70839	40.5143	9789	9789	MS2	13/52	120406QEx1_Gregan_Cipak_Sfr1_try_10%.raw
	High	NLQEQLITAETARK	Unambiguous	2	1	SPBC28F2.07		HCD	1	0	1	1				72	4.19856	0	1	0	250	2	807.943	1614.88	-1.28644	40.5662	9803	9803	MS2	16/26	120406QEx1_Gregan_Cipak_Sfr1_try_10%.raw
spectrum OK - T2/S4	High	QTAsPQVADTNLKPSLAVTNLNSDETNTSSEPVTSPLR	Unambiguous	2	1	SPBC28F2.07	S4(Phospho)	HCD	1	0	1	1	0.0223504	T(2): 97.8; S(4): 2.2; T(10): 0.0; S(15): 0.0; T(19): 0.0; S(23): 0.0; T(26): 0.0; T(28): 0.0; S(29): 0.0; S(30): 0.0; T(34): 0.0; S(35): 0.0	268.957	1271	4.16684	0	0	1.42853	179	3	1354.99	4062.95	-0.0472071	52.6984	13170	13170	MS2	23/220	120406QEx1_Gregan_Cipak_Sfr1_try_10%.raw
spectrum OK - S23	High	QTASPQVADTNLKPSLAVTNLNsDETNTSSEPVTSPLR	Unambiguous	2	1	SPBC28F2.07	S23(Phospho)	HCD	1	0	1	1	0.974933	T(2): 2.4; S(4): 0.1; T(10): 0.0; S(15): 0.0; T(19): 0.0; S(23): 97.5; T(26): 0.1; T(28): 0.0; S(29): 0.0; S(30): 0.0; T(34): 0.0; S(35): 0.0	301.814	1142	4.97266	0	0	0	33	3	1354.99	4062.94	-1.75976	52.2555	13045	13045	MS2	22/220	120406QEx1_Gregan_Cipak_Sfr1_try_10%.raw
spectrum OK - T34/S35	High	QTASPQVADTNLKPSLAVTNLNSDETNTSSEPVTsPLR	Unambiguous	2	1	SPBC28F2.07	S35(Phospho)	HCD	1	0	1	1	0.999762	T(2): 0.0; S(4): 0.0; T(10): 0.0; S(15): 0.0; T(19): 0.0; S(23): 0.0; T(26): 0.0; T(28): 0.0; S(29): 0.0; S(30): 0.0; T(34): 0.0; S(35): 100.0	433.197	855	4.44398	0	0	0	6	3	1354.99	4062.96	2.02588	51.1513	12723	12723	MS2	22/220	120406QEx1_Gregan_Cipak_Sfr1_try_10%.raw
nice spectrum	High	QTASPQVADTNLKPSLAVTNLNSDETNTSSEPVTSPLR	Unambiguous	2	1	SPBC28F2.07		HCD	1	0	1	1				504	7.66222	0	0	1.70161	3	3	1328.33	3982.99	1.55116	49.0631	12164	12164	MS2	26/148	120406QEx1_Gregan_Cipak_Sfr1_try_10%.raw
	High	QTASPQVADTNLKPSLAVTNLNSDETNTSSEPVTSPLR	Unambiguous	2	1	SPBC28F2.07		HCD	1	0	1	1				610	5.80377	0	0	0.0957471	1	4	996.503	3982.99	1.01145	49.0951	12175	12175	MS2	24/222	120406QEx1_Gregan_Cipak_Sfr1_try_10%.raw
	High	QTASPQVADTNLKPSLAVTNLNSDETNTSSEPVTSPLR	Unambiguous	2	1	SPBC28F2.07		HCD	1	0	1	1				561	6.59055	0	0	48.3705	16	3	1328.33	3982.99	1.22732	49.4936	12278	12278	MS2	22/148	120406QEx1_Gregan_Cipak_Sfr1_try_10%.raw
	High	QTASPQVADTNLKPSLAVTNLNSDETNTSSEPVTSPLR	Unambiguous	2	1	SPBC28F2.07		HCD	1	0	1	1				699	5.60211	0	0	1.60535	50	4	996.502	3982.98	0.0307146	49.7021	12330	12330	MS2	26/222	120406QEx1_Gregan_Cipak_Sfr1_try_10%.raw
	High	QTASPQVADTNLKPSLAVTNLNSDETNTSSEPVTSPLR	Unambiguous	2	1	SPBC28F2.07		HCD	1	0	1	1				445	6.44232	0	0	0	125	3	1328.34	3982.99	2.19477	50.7067	12603	12603	MS2	23/148	120406QEx1_Gregan_Cipak_Sfr1_try_10%.raw
	High	QTASPQVADTNLKPSLAVTNLNSDETNTSSEPVTSPLR	Unambiguous	2	1	SPBC28F2.07		HCD	1	0	1	1				611	6.41779	0	0	16.6445	250	4	996.504	3982.99	2.48254	50.7114	12604	12604	MS2	23/222	120406QEx1_Gregan_Cipak_Sfr1_try_10%.raw
	High	QTASPQVADTNLKPSLAVTNLNSDETNTSSEPVTSPLR	Unambiguous	2	1	SPBC28F2.07		HCD	1	0	1	1				452	6.14022	0	0	5.91646	31	3	1328.33	3982.99	0.631725	54.1685	13556	13556	MS2	22/148	120406QEx1_Gregan_Cipak_Sfr1_try_10%.raw
	High	QTASPQVADTNLKPSLAVTNLNSDETNTSSEPVTSPLR	Unambiguous	2	1	SPBC28F2.07		HCD	1	0	1	1				403	6.19428	0	0	3.11187	48	3	1328.33	3982.99	1.18339	54.5671	13658	13658	MS2	21/148	120406QEx1_Gregan_Cipak_Sfr1_try_10%.raw
	High	QTASPQVADTNLKPSLAVTNLNSDETNTSSEPVTSPLR	Unambiguous	2	1	SPBC28F2.07		HCD	1	0	1	1				397	5.59189	0	0	3.70929	118	3	1328.34	3982.99	2.01088	55.0774	13786	13786	MS2	21/148	120406QEx1_Gregan_Cipak_Sfr1_try_10%.raw
spectrum OK	High	RLFKsPISNcLNPK	Unambiguous	1	1	SPBC28F2.07	S5(Phospho); C10(Carbamidomethyl)	HCD	1	0	1	1	1	S(5): 100.0; S(8): 0.0	348.309	118	4.0585	0	2	8.80859	78	3	585.297	1753.88	-2.32256	38.4506	9206	9206	MS2	19/76	120406QEx1_Gregan_Cipak_Sfr1_try_10%.raw
	High	RLFKsPISNcLNPK	Unambiguous	1	1	SPBC28F2.07	S5(Phospho); C10(Carbamidomethyl)	HCD	1	0	1	1	0.999999	S(5): 100.0; S(8): 0.0	346.938	102	3.74975	0	2	11.6283	250	2	877.443	1753.88	-2.2801	38.5233	9225	9225	MS2	18/38	120406QEx1_Gregan_Cipak_Sfr1_try_10%.raw
probably OK	High	sDPEITQLLSR	Unambiguous	2	1	SPBC28F2.07	S1(Phospho)	HCD	1	0	1	1	1	S(1): 100.0; T(6): 0.0; S(10): 0.0	213.542	98	2.30048	0	0	18.0104	250	2	669.821	1338.63	3.21575	59.4828	14867	14867	MS2	13/40	120406QEx1_Gregan_Cipak_Sfr1_try_10%.raw
	High	SDPEITQLLSR	Unambiguous	2	1	SPBC28F2.07		HCD	1	0	1	1				73	3.00161	0	0	30.0288	250	2	629.835	1258.66	-0.247527	45.361	11138	11138	MS2	12/20	120406QEx1_Gregan_Cipak_Sfr1_try_10%.raw
	Low	SDPEITQLLSR	Unconsidered	2	1	SPBC28F2.07		HCD	1	0	1	1				52	2.06154	0	0	48.9626	236	3	420.226	1258.66	-1.42202	45.3837	11143	11143	MS2	11/40	120406QEx1_Gregan_Cipak_Sfr1_try_10%.raw
	High	SDPEITQLLSR	Unambiguous	2	1	SPBC28F2.07		HCD	1	0	1	1				55	3.83279	0	0	17.1593	9	2	629.836	1258.66	0.916281	50.8868	12652	12652	MS2	13/20	120406QEx1_Gregan_Cipak_Sfr1_try_10%.raw
	High	SDPEITQLLSR	Unambiguous	2	1	SPBC28F2.07		HCD	1	0	1	1				54	2.95665	0	0	0	136	3	420.225	1258.66	-2.00393	50.9027	12657	12657	MS2	14/40	120406QEx1_Gregan_Cipak_Sfr1_try_10%.raw
	High	SDPEITQLLSR	Unambiguous	2	1	SPBC28F2.07		HCD	1	0	1	1				50	2.70869	0	0	0.658866	0	2	629.836	1258.67	1.49818	51.2228	12749	12749	MS2	12/20	120406QEx1_Gregan_Cipak_Sfr1_try_10%.raw
	Medium	SDPEITQLLSR	Unambiguous	2	1	SPBC28F2.07		HCD	1	0	1	1				55	2.43293	0	0	0	5	3	420.226	1258.66	0.396432	51.2454	12756	12756	MS2	10/40	120406QEx1_Gregan_Cipak_Sfr1_try_10%.raw
	High	SDPEITQLLSR	Unambiguous	2	1	SPBC28F2.07		HCD	1	0	1	1				52	2.75409	0	0	6.67223	2	2	629.836	1258.66	0.334378	51.5629	12843	12843	MS2	13/20	120406QEx1_Gregan_Cipak_Sfr1_try_10%.raw
	High	SDPEITQLLSR	Unambiguous	2	1	SPBC28F2.07		HCD	1	0	1	1				61	3.12879	0	0	24.7481	8	2	629.835	1258.66	-1.0234	51.907	12945	12945	MS2	12/20	120406QEx1_Gregan_Cipak_Sfr1_try_10%.raw
	High	SDPEITQLLSR	Unambiguous	2	1	SPBC28F2.07		HCD	1	0	1	1				65	3.04561	0	0	52.8444	10	2	629.836	1258.66	0.14041	52.2542	13044	13044	MS2	12/20	120406QEx1_Gregan_Cipak_Sfr1_try_10%.raw
	High	SDPEITQLLSR	Unambiguous	2	1	SPBC28F2.07		HCD	1	0	1	1				56	2.67843	0	0	27.104	15	2	629.835	1258.66	-0.150543	52.6052	13143	13143	MS2	13/20	120406QEx1_Gregan_Cipak_Sfr1_try_10%.raw
	High	SDPEITQLLSR	Unambiguous	2	1	SPBC28F2.07		HCD	1	0	1	1				60	2.98978	0	0	10.5266	26	2	629.835	1258.66	-0.247527	52.9525	13237	13237	MS2	13/20	120406QEx1_Gregan_Cipak_Sfr1_try_10%.raw
	High	SDPEITQLLSR	Unambiguous	2	1	SPBC28F2.07		HCD	1	0	1	1				52	3.04078	0	0	4.59847	37	2	629.836	1258.66	0.0434255	53.3165	13336	13336	MS2	14/20	120406QEx1_Gregan_Cipak_Sfr1_try_10%.raw
	High	SDPEITQLLSR	Unambiguous	2	1	SPBC28F2.07		HCD	1	0	1	1				56	2.98567	0	0	5.58721	41	2	629.835	1258.66	-0.247527	53.6674	13421	13421	MS2	13/20	120406QEx1_Gregan_Cipak_Sfr1_try_10%.raw
	High	SDPEITQLLSR	Unambiguous	2	1	SPBC28F2.07		HCD	1	0	1	1				65	3.40751	0	0	0	64	2	629.836	1258.66	0.528345	54.0179	13512	13512	MS2	13/20	120406QEx1_Gregan_Cipak_Sfr1_try_10%.raw
	High	SDPEITQLLSR	Unambiguous	2	1	SPBC28F2.07		HCD	1	0	1	1				63	3.29634	0	0	29.1518	66	2	629.836	1258.66	0.14041	54.3721	13609	13609	MS2	13/20	120406QEx1_Gregan_Cipak_Sfr1_try_10%.raw
	High	SDPEITQLLSR	Unambiguous	2	1	SPBC28F2.07		HCD	1	0	1	1				59	2.88633	0	0	23.1342	55	2	629.835	1258.66	-0.150543	54.7247	13696	13696	MS2	12/20	120406QEx1_Gregan_Cipak_Sfr1_try_10%.raw
	High	SDPEITQLLSR	Unambiguous	2	1	SPBC28F2.07		HCD	1	0	1	1				63	3.06991	0	0	33.7531	106	2	629.835	1258.66	-0.635463	55.0798	13787	13787	MS2	13/20	120406QEx1_Gregan_Cipak_Sfr1_try_10%.raw
	High	SDPEITQLLSR	Unambiguous	2	1	SPBC28F2.07		HCD	1	0	1	1				71	2.79546	0	0	7.30328	90	2	629.836	1258.66	0.237394	55.4571	13886	13886	MS2	13/20	120406QEx1_Gregan_Cipak_Sfr1_try_10%.raw
	High	SDPEITQLLSR	Unambiguous	2	1	SPBC28F2.07		HCD	1	0	1	1				71	3.44935	0	0	0	250	2	629.835	1258.66	-0.344511	55.8073	13973	13973	MS2	13/20	120406QEx1_Gregan_Cipak_Sfr1_try_10%.raw
	High	SDPEITQLLSR	Unambiguous	2	1	SPBC28F2.07		HCD	1	0	1	1				64	3.29127	0	0		250	2	629.837	1258.67	2.42107	56.1488	14062	14062	MS2	12/20	120406QEx1_Gregan_Cipak_Sfr1_try_10%.raw
	High	SDPEITQLLSR	Unambiguous	2	1	SPBC28F2.07		HCD	1	0	1	1				59	3.31271	0	0	10.5263	250	2	629.834	1258.66	-2.57515	56.5396	14158	14158	MS2	12/20	120406QEx1_Gregan_Cipak_Sfr1_try_10%.raw
	High	SDPEITQLLSR	Unambiguous	2	1	SPBC28F2.07		HCD	1	0	1	1				70	2.89651	0	0	0	195	2	629.836	1258.66	0.916281	56.8823	14242	14242	MS2	12/20	120406QEx1_Gregan_Cipak_Sfr1_try_10%.raw
	High	SDPEITQLLSR	Unambiguous	2	1	SPBC28F2.07		HCD	1	0	1	1				58	2.92966	0	0	17.3923	250	2	629.835	1258.66	-0.150543	57.2862	14340	14340	MS2	12/20	120406QEx1_Gregan_Cipak_Sfr1_try_10%.raw
	High	SDPEITQLLSR	Unambiguous	2	1	SPBC28F2.07		HCD	1	0	1	1				69	2.82442	0	0	35.2695	250	2	629.836	1258.66	0.0434255	57.7751	14459	14459	MS2	12/20	120406QEx1_Gregan_Cipak_Sfr1_try_10%.raw
	High	SDPEITQLLSR	Unambiguous	2	1	SPBC28F2.07		HCD	1	0	1	1				74	3.17846	0	0	12.5956	250	2	629.835	1258.66	-1.0234	58.1805	14556	14556	MS2	12/20	120406QEx1_Gregan_Cipak_Sfr1_try_10%.raw
	High	SDPEITQLLSR	Unambiguous	2	1	SPBC28F2.07		HCD	1	0	1	1				60	2.98599	0	0	13.9352	250	2	629.834	1258.66	-1.79927	58.543	14643	14643	MS2	12/20	120406QEx1_Gregan_Cipak_Sfr1_try_10%.raw
	High	SDPEITQLLSR	Unambiguous	2	1	SPBC28F2.07		HCD	1	0	1	1				61	2.90681	0	0	30.9721	250	2	629.835	1258.66	-1.12038	59.6996	14923	14923	MS2	12/20	120406QEx1_Gregan_Cipak_Sfr1_try_10%.raw
	High	SDPEITQLLSR	Unambiguous	2	1	SPBC28F2.07		HCD	1	0	1	1				73	2.79803	0	0	11.0574	250	2	629.836	1258.66	0.819297	60.1426	15023	15023	MS2	12/20	120406QEx1_Gregan_Cipak_Sfr1_try_10%.raw
	High	SDPEITQLLSR	Unambiguous	2	1	SPBC28F2.07		HCD	1	0	1	1				72	2.87704	0	0	3.95468	250	2	629.836	1258.66	0.0434255	60.5524	15122	15122	MS2	12/20	120406QEx1_Gregan_Cipak_Sfr1_try_10%.raw
	High	SDPEITQLLSR	Unambiguous	2	1	SPBC28F2.07		HCD	1	0	1	1				63	2.68278	0	0	7.47045	250	2	629.836	1258.67	1.11025	61.0152	15232	15232	MS2	12/20	120406QEx1_Gregan_Cipak_Sfr1_try_10%.raw
	High	SDPEITQLLSR	Unambiguous	2	1	SPBC28F2.07		HCD	1	0	1	1				72	3.06718	0	0	13.2014	250	2	629.836	1258.66	0.916281	61.3744	15316	15316	MS2	11/20	120406QEx1_Gregan_Cipak_Sfr1_try_10%.raw
	High	SDPEITQLLSR	Unambiguous	2	1	SPBC28F2.07		HCD	1	0	1	1				60	2.79672	0	0	44.836	250	2	629.836	1258.66	0.722313	61.7497	15399	15399	MS2	11/20	120406QEx1_Gregan_Cipak_Sfr1_try_10%.raw
	High	SDPEITQLLSR	Unambiguous	2	1	SPBC28F2.07		HCD	1	0	1	1				70	2.91827	0	0	9.76165	250	2	629.836	1258.67	1.01326	62.1679	15495	15495	MS2	11/20	120406QEx1_Gregan_Cipak_Sfr1_try_10%.raw
	High	SDPEITQLLSR	Unambiguous	2	1	SPBC28F2.07		HCD	1	0	1	1				60	2.81415	0	0	15.0799	250	2	629.836	1258.67	1.01326	62.8783	15656	15656	MS2	12/20	120406QEx1_Gregan_Cipak_Sfr1_try_10%.raw
	High	SDPEITQLLSR	Unambiguous	2	1	SPBC28F2.07		HCD	1	0	1	1				72	2.66918	0	0	0	250	2	629.836	1258.67	1.11025	64.6601	16071	16071	MS2	13/20	120406QEx1_Gregan_Cipak_Sfr1_try_10%.raw
	High	SDPEITQLLSR	Unambiguous	2	1	SPBC28F2.07		HCD	1	0	1	1				64	2.66192	0	0	38.1995	250	2	629.836	1258.66	0.625329	65.5536	16270	16270	MS2	12/20	120406QEx1_Gregan_Cipak_Sfr1_try_10%.raw
	Medium	SDPEITQLLSR	Unambiguous	2	1	SPBC28F2.07		HCD	1	0	1	1				55	1.96954	0	0	47.9203	250	2	629.834	1258.66	-1.99324	66.1685	16409	16409	MS2	11/20	120406QEx1_Gregan_Cipak_Sfr1_try_10%.raw
	Medium	SDPEITQLLSR	Unambiguous	2	1	SPBC28F2.07		HCD	1	0	1	1				60	2.22834	0	0	43.312	250	2	629.834	1258.66	-2.38118	68.3704	16898	16898	MS2	10/20	120406QEx1_Gregan_Cipak_Sfr1_try_10%.raw
	High	SDPEITQLLSR	Unambiguous	2	1	SPBC28F2.07		HCD	1	0	1	1				63	2.33804	0	0	0	250	2	629.836	1258.66	0.625329	68.7422	16983	16983	MS2	11/20	120406QEx1_Gregan_Cipak_Sfr1_try_10%.raw
	Low	SDPEITQLLSRR	Unconsidered	2	1	SPBC28F2.07		HCD	1	0	1	1				58	2.12795	0	1	21.8609	157	3	472.26	1414.77	0.126195	45.3245	11129	11129	MS2	11/44	120406QEx1_Gregan_Cipak_Sfr1_try_10%.raw
	Medium	SDPEITQLLSRR	Unambiguous	2	1	SPBC28F2.07		HCD	1	0	1	1				59	1.98598	0	1	18.7891	250	2	707.885	1414.76	-1.11541	45.3336	11131	11131	MS2	4/22	120406QEx1_Gregan_Cipak_Sfr1_try_10%.raw
	High	sPISNcLNPK	Unambiguous	1	1	SPBC28F2.07	S1(Phospho); C6(Carbamidomethyl)	HCD	1	0	1	1	1	S(1): 100.0; S(4): 0.0	305.809	95	3.50832	0	0	0	147	2	605.27	1209.53	-0.725899	37.188	8850	8850	MS2	15/36	120406QEx1_Gregan_Cipak_Sfr1_try_10%.raw
spectrum OK	High	sPISNcLNPK	Unambiguous	1	1	SPBC28F2.07	S1(Phospho); C6(Carbamidomethyl)	HCD	1	0	1	1	1	S(1): 100.0; S(4): 0.0	292.61	86	2.86291	0	0	15.8213	19	2	605.27	1209.53	-0.120357	37.5292	8949	8949	MS2	15/36	120406QEx1_Gregan_Cipak_Sfr1_try_10%.raw
	Medium	SPISNcLNPK	Unambiguous	1	1	SPBC28F2.07	C6(Carbamidomethyl)	HCD	1	0	1	1				82	2.21642	0	0	21.5554	250	2	565.287	1129.57	-0.21711	24.7466	5663	5663	MS2	9/18	120406QEx1_Gregan_Cipak_Sfr1_try_10%.raw
	High	SPISNcLNPK	Unambiguous	1	1	SPBC28F2.07	C6(Carbamidomethyl)	HCD	1	0	1	1				67	3.07247	0	0	8.20365	51	2	565.287	1129.57	-0.000973548	32.2002	7536	7536	MS2	11/18	120406QEx1_Gregan_Cipak_Sfr1_try_10%.raw
	High	SPISNcLNPK	Unambiguous	1	1	SPBC28F2.07	C6(Carbamidomethyl)	HCD	1	0	1	1				65	2.92728	0	0	0.442259	0	2	565.288	1129.57	1.18778	32.5421	7630	7630	MS2	11/18	120406QEx1_Gregan_Cipak_Sfr1_try_10%.raw
	High	SPISNcLNPK	Unambiguous	1	1	SPBC28F2.07	C6(Carbamidomethyl)	HCD	1	0	1	1				61	2.44151	0	0	0.426113	1	2	565.288	1129.57	0.863572	32.9013	7724	7724	MS2	11/18	120406QEx1_Gregan_Cipak_Sfr1_try_10%.raw
	High	SPISNcLNPK	Unambiguous	1	1	SPBC28F2.07	C6(Carbamidomethyl)	HCD	1	0	1	1				57	3.1017	0	0	2.44173	6	2	565.287	1129.57	0.323231	33.2498	7812	7812	MS2	11/18	120406QEx1_Gregan_Cipak_Sfr1_try_10%.raw
	High	SPISNcLNPK	Unambiguous	1	1	SPBC28F2.07	C6(Carbamidomethyl)	HCD	1	0	1	1				60	3.12353	0	0	6.43983	18	2	565.287	1129.57	0.323231	33.6318	7915	7915	MS2	11/18	120406QEx1_Gregan_Cipak_Sfr1_try_10%.raw
	High	SPISNcLNPK	Unambiguous	1	1	SPBC28F2.07	C6(Carbamidomethyl)	HCD	1	0	1	1				75	3.05116	0	0	16.7071	27	2	565.287	1129.57	0.107095	33.979	8005	8005	MS2	11/18	120406QEx1_Gregan_Cipak_Sfr1_try_10%.raw
	High	SPISNcLNPK	Unambiguous	1	1	SPBC28F2.07	C6(Carbamidomethyl)	HCD	1	0	1	1				80	3.07595	0	0	32.6576	38	2	565.287	1129.57	-0.541315	34.4147	8122	8122	MS2	12/18	120406QEx1_Gregan_Cipak_Sfr1_try_10%.raw
	High	SPISNcLNPK	Unambiguous	1	1	SPBC28F2.07	C6(Carbamidomethyl)	HCD	1	0	1	1				82	2.52987	0	0	52.7272	145	2	565.287	1129.57	-0.109042	35.1391	8306	8306	MS2	11/18	120406QEx1_Gregan_Cipak_Sfr1_try_10%.raw
	High	SPISNcLNPK	Unambiguous	1	1	SPBC28F2.07	C6(Carbamidomethyl)	HCD	1	0	1	1				86	3.10035	0	0	29.9192	180	2	565.288	1129.57	2.26845	36.1839	8578	8578	MS2	12/18	120406QEx1_Gregan_Cipak_Sfr1_try_10%.raw
	High	TEFTmSmFLNQFGVPVHLMSFDEENGDWK	Unambiguous	2	1	SPBC28F2.07	M5(Oxidation); M7(Oxidation)	HCD	1	0	1	1				1282	5.46609	0	0	1.25841	250	3	1156.85	3468.52	0.601374	67.4844	16701	16701	MS2	21/112	120406QEx1_Gregan_Cipak_Sfr1_try_10%.raw
	High	TEFTmSMFLNQFGVPVHLmSFDEENGDWK	Unambiguous	2	1	SPBC28F2.07	M5(Oxidation); M19(Oxidation)	HCD	1	0	1	1				1202	4.97979	0	0	0	250	3	1156.84	3468.52	-0.56002	65.8562	16341	16341	MS2	17/112	120406QEx1_Gregan_Cipak_Sfr1_try_10%.raw
	High	TEFTmSMFLNQFGVPVHLMSFDEENGDWK	Unambiguous	2	1	SPBC28F2.07	M5(Oxidation)	HCD	1	0	1	1				1114	6.06314	0	0	0	86	3	1151.51	3452.53	0.793095	68.9224	17022	17022	MS2	19/112	120406QEx1_Gregan_Cipak_Sfr1_try_10%.raw
	High	TEFTMSmFLNQFGVPVHLMSFDEENGDWK	Unambiguous	2	1	SPBC28F2.07	M7(Oxidation)	HCD	1	0	1	1				1180	5.26768	0	0	0	30	3	1151.51	3452.53	-0.161538	69.3104	17136	17136	MS2	18/112	120406QEx1_Gregan_Cipak_Sfr1_try_10%.raw
	High	TEFTMSMFLNQFGVPVHLMSFDEENGDWK	Unambiguous	2	1	SPBC28F2.07		HCD	1	0	1	1				1052	6.21038	0	0	35.4777	28	3	1146.18	3436.53	-0.931553	69.3129	17138	17138	MS2	16/112	120406QEx1_Gregan_Cipak_Sfr1_try_10%.raw
	Medium	TTPNSIK	Unambiguous	1	1	SPBC28F2.07		HCD	1	0	1	1				64	2.20153	0	0	10.4483	62	2	380.714	760.42	-0.323462	18.8882	4322	4322	MS2	9/12	120406QEx1_Gregan_Cipak_Sfr1_try_10%.raw
	Medium	TTPNSIK	Unambiguous	1	1	SPBC28F2.07		HCD	1	0	1	1				64	1.91181	0	0	6.34489	8	2	380.714	760.421	1.04104	19.2608	4404	4404	MS2	7/12	120406QEx1_Gregan_Cipak_Sfr1_try_10%.raw
	Low	TTPNSIK	Unconsidered	1	1	SPBC28F2.07		HCD	1	0	1	1				64	1.8503	0	0	30.4493	35	2	380.714	760.42	-0.00240163	19.6377	4488	4488	MS2	8/12	120406QEx1_Gregan_Cipak_Sfr1_try_10%.raw
	Medium	TTPNSIK	Unambiguous	1	1	SPBC28F2.07		HCD	1	0	1	1				64	2.04636	0	0	29.1294	119	2	380.713	760.42	-0.403727	20.1417	4593	4593	MS2	9/12	120406QEx1_Gregan_Cipak_Sfr1_try_10%.raw
	Low	TTPNSIK	Unconsidered	1	1	SPBC28F2.07		HCD	1	0	1	1				71	1.87959	0	0	52.846	177	2	380.712	760.417	-3.29328	20.8403	4743	4743	MS2	7/12	120406QEx1_Gregan_Cipak_Sfr1_try_10%.raw
probably OK - 2 peaks in elution profile for single phosphorylated form	Medium	TtPNSIKR	Unambiguous	1	1	SPBC28F2.07	T2(Phospho)	HCD	1	0	1	1	0.990585	T(1): 0.9; T(2): 99.1; S(5): 0.0	162.822	47	2.17211	0	1	1.49007	19	2	498.747	996.487	-0.00901024	19.1334	4377	4377	MS2	8/20	120406QEx1_Gregan_Cipak_Sfr1_try_10%.raw
	Low	TtPNSIKR	Unconsidered	1	1	SPBC28F2.07	T2(Phospho)	HCD	1	0	1	1	0.5	T(1): 50.0; T(2): 50.0; S(5): 0.0	137.435	58	1.67912	0	1	0	250	2	498.747	996.487	-0.192761	19.4783	4454	4454	MS2	8/20	120406QEx1_Gregan_Cipak_Sfr1_try_10%.raw
spectrum OK	Medium	TTPNsIKR	Unambiguous	1	1	SPBC28F2.07	S5(Phospho)	HCD	1	0	1	1	1	T(1): 0.0; T(2): 0.0; S(5): 100.0	232.289	49	1.93824	0	1	15.7194	69	2	498.747	996.487	-0.192761	19.8502	4532	4532	MS2	9/20	120406QEx1_Gregan_Cipak_Sfr1_try_10%.raw
	Low	TTPNSIKR	Unconsidered	1	1	SPBC28F2.07		HCD	1	0	1	1				45	1.87342	0	1	0.440672	3	2	458.764	916.52	-1.05086	17.2008	3939	3939	MS2	7/14	120406QEx1_Gregan_Cipak_Sfr1_try_10%.raw
	Low	TTPNSIKR	Unconsidered	1	1	SPBC28F2.07		HCD	1	0	1	1				49	1.87749	0	1	32.9809	173	2	458.764	916.52	-0.784483	18.0701	4151	4151	MS2	7/14	120406QEx1_Gregan_Cipak_Sfr1_try_10%.raw
spectrum OK	Medium	VSLsESDLR	Unambiguous	1	1	SPBC28F2.07	S4(Phospho)	HCD	1	0	1	1	0.999945	S(2): 0.0; S(4): 100.0; S(6): 0.0	240.951	56	2.00077	0	0	0	130	2	543.247	1085.49	-1.47847	42.6596	10392	10392	MS2	10/23	120406QEx1_Gregan_Cipak_Sfr1_try_10%.raw
	Low	VSLsESDLR	Unconsidered	1	1	SPBC28F2.07	S4(Phospho)	HCD	1	0	1	1	0.99996	S(2): 0.0; S(4): 100.0; S(6): 0.0	250.268	60	1.60651	0	0	31.8129	13	2	543.247	1085.49	0.0959264	43.0149	10488	10488	MS2	9/23	120406QEx1_Gregan_Cipak_Sfr1_try_10%.raw
	High	VSLSESDLR	Unambiguous	1	1	SPBC28F2.07		HCD	1	0	1	1				51	2.86173	0	0	53.0193	52	2	503.264	1005.52	-0.541862	36.1432	8567	8567	MS2	9/16	120406QEx1_Gregan_Cipak_Sfr1_try_10%.raw
	High	VSLSESDLR	Unambiguous	1	1	SPBC28F2.07		HCD	1	0	1	1				31	2.65825	0	0	5.12564	1	2	503.265	1005.52	0.732838	36.5027	8664	8664	MS2	8/16	120406QEx1_Gregan_Cipak_Sfr1_try_10%.raw
	High	VSLSESDLR	Unambiguous	1	1	SPBC28F2.07		HCD	1	0	1	1				37	2.674	0	0	10.5649	8	2	503.264	1005.52	0.00443831	36.8431	8749	8749	MS2	9/16	120406QEx1_Gregan_Cipak_Sfr1_try_10%.raw
	High	VSLSESDLR	Unambiguous	1	1	SPBC28F2.07		HCD	1	0	1	1				43	2.90957	0	0	0	31	2	503.263	1005.52	-2.36287	37.1825	8848	8848	MS2	9/16	120406QEx1_Gregan_Cipak_Sfr1_try_10%.raw
	High	VSLSESDLR	Unambiguous	1	1	SPBC28F2.07		HCD	1	0	1	1				48	2.70043	0	0	42.0398	42	2	503.265	1005.52	1.46124	37.5305	8950	8950	MS2	8/16	120406QEx1_Gregan_Cipak_Sfr1_try_10%.raw
	High	VSLSESDLR	Unambiguous	1	1	SPBC28F2.07		HCD	1	0	1	1				48	2.63528	0	0	26.8636	42	2	503.264	1005.52	0.125838	37.8908	9052	9052	MS2	9/16	120406QEx1_Gregan_Cipak_Sfr1_try_10%.raw
	High	VSLSESDLR	Unambiguous	1	1	SPBC28F2.07		HCD	1	0	1	1				51	2.73341	0	0	45.7346	106	2	503.264	1005.52	0.0651383	38.5872	9244	9244	MS2	8/16	120406QEx1_Gregan_Cipak_Sfr1_try_10%.raw
	High	VSLSESDLR	Unambiguous	1	1	SPBC28F2.07		HCD	1	0	1	1				48	2.48994	0	0	46.6158	89	2	503.264	1005.52	0.307938	38.9525	9345	9345	MS2	8/16	120406QEx1_Gregan_Cipak_Sfr1_try_10%.raw
	Medium	VSLSESDLR	Unambiguous	1	1	SPBC28F2.07		HCD	1	0	1	1				48	2.21813	0	0	53.664	116	2	503.264	1005.52	0.125838	39.3353	9455	9455	MS2	8/16	120406QEx1_Gregan_Cipak_Sfr1_try_10%.raw
	High	VSLSESDLR	Unambiguous	1	1	SPBC28F2.07		HCD	1	0	1	1				51	2.45926	0	0	50.5227	143	2	503.264	1005.52	-0.663262	39.7187	9561	9561	MS2	8/16	120406QEx1_Gregan_Cipak_Sfr1_try_10%.raw
	High	VSLSESDLRDsQGQLGIENPPK	Unambiguous	1	1	SPBC28F2.07	S11(Phospho)	HCD	1	0	1	1	1	S(2): 0.0; S(4): 0.0; S(6): 0.0; S(11): 100.0	400.147	278	6.23583	0	1	0	58	3	817.058	2449.16	-0.702921	46.6747	11510	11510	MS2	24/124	120406QEx1_Gregan_Cipak_Sfr1_try_10%.raw
spectrum OK	High	VSLSESDLRDsQGQLGIENPPK	Unambiguous	1	1	SPBC28F2.07	S11(Phospho)	HCD	1	0	1	1	1	S(2): 0.0; S(4): 0.0; S(6): 0.0; S(11): 100.0	480.569	201	5.0365	0	1	0	133	2	1225.08	2449.16	0.274482	46.768	11536	11536	MS2	25/62	120406QEx1_Gregan_Cipak_Sfr1_try_10%.raw
	High	VSLSESDLRDsQGQLGIENPPK	Unambiguous	1	1	SPBC28F2.07	S11(Phospho)	HCD	1	0	1	1	1	S(2): 0.0; S(4): 0.0; S(6): 0.0; S(11): 100.0	298.27	341	5.04378	0	1	26.9225	250	3	817.058	2449.16	-0.553396	47.0413	11608	11608	MS2	19/124	120406QEx1_Gregan_Cipak_Sfr1_try_10%.raw
	High	WKNAAQQAAEVLFKPMAER	Unambiguous	2	1	SPBC28F2.07		HCD	1	0	1	1				109	5.81021	0	1	0	83	3	730.05	2188.14	0.884645	51.1881	12738	12738	MS2	19/72	120406QEx1_Gregan_Cipak_Sfr1_try_10%.raw
	High	WKNAAQQAAEVLFKPMAER	Unambiguous	2	1	SPBC28F2.07		HCD	1	0	1	1				136	5.13408	0	1	15.4385	250	4	547.79	2188.14	1.40848	51.4031	12802	12802	MS2	26/108	120406QEx1_Gregan_Cipak_Sfr1_try_10%.raw

## Sheet: short list
		Confidence Level	Sequence	PSM Ambiguity	# Proteins	# Protein Groups	Protein Group Accessions	Modifications	Activation Type	ΔScore	ΔCn	Rank	Search Engine Rank	pRS Probability	pRS Site Probabilities	pRS Score	Peptides Matched	XCorr	Probability	# Missed Cleavages	Isolation Interference [%]	Ion Inject Time [ms]	Charge	m/z [Da]	MH+ [Da]	ΔM [ppm]	RT [min]	First Scan	Last Scan	MS Order	Ions Matched	Spectrum File
	some unassigned peaks- but probably OK	Low	ALtPDLR	Unconsidered	2	1	SPBC28F2.07	T3(Phospho)	HCD	1	0	1	1	1	T(3): 100.0	222.624	25	1.90261	0	0	2.68495	7	2	433.212	865.418	-0.490206	40.9146	9895	9895	MS2	10/17	120406QEx1_Gregan_Cipak_Sfr1_try_10%.raw
S4/S8	spectrum OK	High	cNNsGNHSDNLGFIEQSETVHPENEK	Unambiguous	2	1	SPBC28F2.07	C1(Carbamidomethyl); S4(Phospho)	HCD	1	0	1	1	8.25582e-05	S(4): 0.0; S(8): 100.0; S(17): 0.0; T(19): 0.0	532.525	796	6.09102	0	0	0	93	3	1012.75	3036.24	0.520219	41.2224	9985	9985	MS2	30/148	120406QEx1_Gregan_Cipak_Sfr1_try_10%.raw
	spectrum OK	High	cNNSGNHsDNLGFIEQSETVHPENEK	Unambiguous	2	1	SPBC28F2.07	C1(Carbamidomethyl); S8(Phospho)	HCD	1	0	1	1	0.977402	S(4): 2.3; S(8): 97.7; S(17): 0.0; T(19): 0.0	304.463	1012	6.41465	0	0	16.232	241	4	759.816	3036.24	-0.429013	41.2697	9998	9998	MS2	25/222	120406QEx1_Gregan_Cipak_Sfr1_try_10%.raw
	spectrum OK	High	DsQGQLGIENPPK	Unambiguous	1	1	SPBC28F2.07	S2(Phospho)	HCD	1	0	1	1	1	S(2): 100.0	268.244	92	3.5517	0	0	44.8966	250	2	731.833	1462.66	0.225714	41.7291	10127	10127	MS2	17/35	120406QEx1_Gregan_Cipak_Sfr1_try_10%.raw
	spectrum OK	Medium	EDLKVSLsESDLR	Unambiguous	1	1	SPBC28F2.07	S8(Phospho)	HCD	1	0	1	1	0.999506	S(6): 0.0; S(8): 100.0; S(10): 0.0	159.527	160	2.55586	0	1	23.0703	64	3	524.251	1570.74	1.92684	46.8633	11563	11563	MS2	11/70	120406QEx1_Gregan_Cipak_Sfr1_try_10%.raw
	spectrum OK	High	LAGGVTQsFR	Unambiguous	2	1	SPBC28F2.07	S8(Phospho)	HCD	1	0	1	1	0.999999	T(6): 0.0; S(8): 100.0	264.309	84	2.93993	0	0	24.2786	170	2	558.265	1115.52	-2.37926	38.8249	9309	9309	MS2	14/26	120406QEx1_Gregan_Cipak_Sfr1_try_10%.raw
	spectrum OK	High	LFKsPISNcLNPK	Unambiguous	1	1	SPBC28F2.07	S4(Phospho); C9(Carbamidomethyl)	HCD	1	0	1	1	1	S(4): 100.0; S(7): 0.0	366.439	118	3.64561	0	1	0	91	2	799.394	1597.78	0.0469951	42.1414	10255	10255	MS2	14/35	120406QEx1_Gregan_Cipak_Sfr1_try_10%.raw
	spectrum OK	High	NILLKPFKsPLR	Unambiguous	1	1	SPBC28F2.07	S9(Phospho)	HCD	1	0	1	1	1	S(9): 100.0	343.988	29	3.70983	0	1	35.8922	170	3	502.625	1505.86	0.374381	43.7382	10688	10688	MS2	17/64	120406QEx1_Gregan_Cipak_Sfr1_try_10%.raw
	spectrum OK - T2/S4	High	QTAsPQVADTNLKPSLAVTNLNSDETNTSSEPVTSPLR	Unambiguous	2	1	SPBC28F2.07	S4(Phospho)	HCD	1	0	1	1	0.0223504	T(2): 97.8; S(4): 2.2; T(10): 0.0; S(15): 0.0; T(19): 0.0; S(23): 0.0; T(26): 0.0; T(28): 0.0; S(29): 0.0; S(30): 0.0; T(34): 0.0; S(35): 0.0	268.957	1271	4.16684	0	0	1.42853	179	3	1354.99	4062.95	-0.0472071	52.6984	13170	13170	MS2	23/220	120406QEx1_Gregan_Cipak_Sfr1_try_10%.raw
	spectrum OK - S23	High	QTASPQVADTNLKPSLAVTNLNsDETNTSSEPVTSPLR	Unambiguous	2	1	SPBC28F2.07	S23(Phospho)	HCD	1	0	1	1	0.974933	T(2): 2.4; S(4): 0.1; T(10): 0.0; S(15): 0.0; T(19): 0.0; S(23): 97.5; T(26): 0.1; T(28): 0.0; S(29): 0.0; S(30): 0.0; T(34): 0.0; S(35): 0.0	301.814	1142	4.97266	0	0	0	33	3	1354.99	4062.94	-1.75976	52.2555	13045	13045	MS2	22/220	120406QEx1_Gregan_Cipak_Sfr1_try_10%.raw
	spectrum OK - T34/S35	High	QTASPQVADTNLKPSLAVTNLNSDETNTSSEPVTsPLR	Unambiguous	2	1	SPBC28F2.07	S35(Phospho)	HCD	1	0	1	1	0.999762	T(2): 0.0; S(4): 0.0; T(10): 0.0; S(15): 0.0; T(19): 0.0; S(23): 0.0; T(26): 0.0; T(28): 0.0; S(29): 0.0; S(30): 0.0; T(34): 0.0; S(35): 100.0	433.197	855	4.44398	0	0	0	6	3	1354.99	4062.96	2.02588	51.1513	12723	12723	MS2	22/220	120406QEx1_Gregan_Cipak_Sfr1_try_10%.raw
	spectrum OK	High	RLFKsPISNcLNPK	Unambiguous	1	1	SPBC28F2.07	S5(Phospho); C10(Carbamidomethyl)	HCD	1	0	1	1	1	S(5): 100.0; S(8): 0.0	348.309	118	4.0585	0	2	8.80859	78	3	585.297	1753.88	-2.32256	38.4506	9206	9206	MS2	19/76	120406QEx1_Gregan_Cipak_Sfr1_try_10%.raw
	probably OK	High	sDPEITQLLSR	Unambiguous	2	1	SPBC28F2.07	S1(Phospho)	HCD	1	0	1	1	1	S(1): 100.0; T(6): 0.0; S(10): 0.0	213.542	98	2.30048	0	0	18.0104	250	2	669.821	1338.63	3.21575	59.4828	14867	14867	MS2	13/40	120406QEx1_Gregan_Cipak_Sfr1_try_10%.raw
	spectrum OK	High	sPISNcLNPK	Unambiguous	1	1	SPBC28F2.07	S1(Phospho); C6(Carbamidomethyl)	HCD	1	0	1	1	1	S(1): 100.0; S(4): 0.0	292.61	86	2.86291	0	0	15.8213	19	2	605.27	1209.53	-0.120357	37.5292	8949	8949	MS2	15/36	120406QEx1_Gregan_Cipak_Sfr1_try_10%.raw
2 peaks in elution profile for single phosphorylated form	probably OK	Medium	TtPNSIKR	Unambiguous	1	1	SPBC28F2.07	T2(Phospho)	HCD	1	0	1	1	0.990585	T(1): 0.9; T(2): 99.1; S(5): 0.0	162.822	47	2.17211	0	1	1.49007	19	2	498.747	996.487	-0.00901024	19.1334	4377	4377	MS2	8/20	120406QEx1_Gregan_Cipak_Sfr1_try_10%.raw
	spectrum OK	Medium	TTPNsIKR	Unambiguous	1	1	SPBC28F2.07	S5(Phospho)	HCD	1	0	1	1	1	T(1): 0.0; T(2): 0.0; S(5): 100.0	232.289	49	1.93824	0	1	15.7194	69	2	498.747	996.487	-0.192761	19.8502	4532	4532	MS2	9/20	120406QEx1_Gregan_Cipak_Sfr1_try_10%.raw
	spectrum OK	Medium	VSLsESDLR	Unambiguous	1	1	SPBC28F2.07	S4(Phospho)	HCD	1	0	1	1	0.999945	S(2): 0.0; S(4): 100.0; S(6): 0.0	240.951	56	2.00077	0	0	0	130	2	543.247	1085.49	-1.47847	42.6596	10392	10392	MS2	10/23	120406QEx1_Gregan_Cipak_Sfr1_try_10%.raw
	spectrum OK	High	VSLSESDLRDsQGQLGIENPPK	Unambiguous	1	1	SPBC28F2.07	S11(Phospho)	HCD	1	0	1	1	1	S(2): 0.0; S(4): 0.0; S(6): 0.0; S(11): 100.0	480.569	201	5.0365	0	1	0	133	2	1225.08	2449.16	0.274482	46.768	11536	11536	MS2	25/62	120406QEx1_Gregan_Cipak_Sfr1_try_10%.raw

## Sheet: phosphosite probabilities
Position	Target	Modification	Classification	Highest PTM Score	Highest Peptide Confidence	Sequence Motif
26	S	Phospho	Post-translational	100	Middle	DLKVSLsESDLRD
33	S	Phospho	Post-translational	100	High	ESDLRDsQGQLGI
52	S	Phospho	Post-translational	100	High	NNSGNHsDNLGFI	could be aswell S48
73	T	Phospho	Post-translational	100	Low	ENEKALtPDLRDT
109	S	Phospho	Post-translational	100	High	LLKPFKsPLRQTA
114	T	Phospho	Post-translational	97.8	High	KSPLRQtASPQVA	could be aswell S116; not distinguishable in spectrum
135	S	Phospho	Post-translational	97.5	High	AVTNLNsDETNTS
147	S	Phospho	Post-translational	100	High	SSEPVTsPLRTTP	could be aswell T146; not distinguishable in spectrum
152	T	Phospho	Post-translational	99.1	Middle	TSPLRTtPNSIKR	could be aswell T151; not distinguishable in spectrum
155	S	Phospho	Post-translational	100	Middle	LRTTPNsIKRQKR
165	S	Phospho	Post-translational	100	High	QKRLFKsPISNCL
175	S	Phospho	Post-translational	100	High	NCLNPKsDPEITQ
253	S	Phospho	Post-translational	100	High	AGGVTQsFRIEEG

## Sheet: Swi5_tryp
	Same coverage with mild filter settings and high confidence settings

## Sheet: Swi5_chymo
	mild filter settings
seems OK
Confidence Level	Sequence	PSM Ambiguity	Modifications	Activation Type	ΔScore	ΔCn	Rank	Search Engine Rank	pRS Probability	pRS Site Probabilities	pRS Score	Peptides Matched	XCorr	# Missed Cleavages	Isolation Interference [%]	Ion Inject Time [ms]	Charge	m/z [Da]	MH+ [Da]	ΔM [ppm]	RT [min]	First Scan	Last Scan	MS Order	Ions Matched	Spectrum File
Medium	DRFGVNGsE	Unambiguous	S8(Phospho)	HCD	1	0	1	1	1	S(8): 100.0	177.685	152	2.40288	1	15.3752	160	2	530.708	1060.41	0.125675	37.0155	8427	8427	MS2	11/23	120406QEx1_Gregan_Cipak_Sfr1_chy_10%.raw
1 spectrum assigned to phosphopeptide, 10 to the unphosphorylated form

## Sheet: identified proteins
Accession	Description	Score	Coverage	# Proteins	# Unique Peptides	# Peptides	# PSMs	# AAs	MW [kDa]	calc. pI
SPBC28F2.07	sfr1 dds20, mug13|Swi five-dependent recombination repair protein Sfr1|Schizosaccharomyces pombe|chr 2|||Manual	1112.82	83.28	2	26	26	281	299	33.6172	7.40088
SPBC409.03	swi5 Swi5 protein|Schizosaccharomyces pombe|chr 2|||Manual	445.974	60	1	6	6	130	85	9.74201	6.15088
SPCC1739.13	ssa2 heat shock protein Ssa2 |Schizosaccharomyces pombe|chr 3|||Manual	352.19	65.22	1	19	38	94	647	70.1897	5.24951
SPAC13G7.02c	ssa1 heat shock protein Ssa1 |Schizosaccharomyces pombe|chr 1|||Manual	242.994	53.88	1	13	32	65	644	70.0997	5.24951
SPAC664.11	ssc1 ssp1|mitochondrial heat shock protein Hsp70|Schizosaccharomyces pombe|chr 1|||Manual	220.188	54.01	1	34	34	56	674	72.9319	7.1665
SPBP8B7.03c	rpl402 rpl4-2, rpl4|60S ribosomal protein L4 |Schizosaccharomyces pombe|chr 2|||Manual	209.598	53.99	1	5	18	53	363	39.7427	10.7847
SPAPB8E5.06c	rpl302 rpl3-2, rpl3-b|60S ribosomal protein L3|Schizosaccharomyces pombe|chr 1|||Manual	223.339	53.09	2	21	21	53	388	43.7893	10.272
SPAC22A12.15c	bip1 bip|ER heat shock protein BiP|Schizosaccharomyces pombe|chr 1|||Manual	198.926	46.61	1	29	30	53	663	73.1816	4.95752
SPAC1F7.13c	rpl801 rpl8-1, rpl18, rpk5a, rpl2-1, SPAC21E11.02c|60S ribosomal protein L8 |Schizosaccharomyces pombe|chr 1|||Manual	248.899	54.55	1	10	10	52	253	27.0834	10.8579
SPBC1711.06	rpl401 rpl4-1, rpl4|60S ribosomal protein L4 |Schizosaccharomyces pombe|chr 2|||Manual	177.341	49.59	1	4	16	44	363	39.8858	10.7114
SPBC29A3.04	rpl8 60S ribosomal protein L7a/L8 |Schizosaccharomyces pombe|chr 2|||Manual	141.026	69.11	1	20	20	42	259	28.589	10.3452
SPBC21B10.10	rps402 rps4-2|40S ribosomal protein S4 |Schizosaccharomyces pombe|chr 2|||Manual	138.57	51.91	1	2	13	39	262	29.6402	10.2427
SPBC1709.05	sks2 hsc1|heat shock protein, ribosome associated molecular chaperone Sks2|Schizosaccharomyces pombe|chr 2|||Manual	148.298	57.26	1	25	25	38	613	67.1639	6.0874
SPAC959.07	rps403 rps4-3, rps4|40S ribosomal protein S4 |Schizosaccharomyces pombe|chr 1|||Manual	129.513	51.91	1	2	13	37	262	29.6562	10.2573
SPBC32F12.11	tdh1 gpd1|glyceraldehyde-3-phosphate dehydrogenase Tdh1|Schizosaccharomyces pombe|chr 2|||Manual	161.615	54.46	1	7	14	36	336	35.8473	6.69775
SPAC13G6.07c	rps601 rps6-1|40S ribosomal protein S6|Schizosaccharomyces pombe|chr 1|||Manual	128.779	45.61	2	10	10	33	239	27.4822	10.8286
SPBC18H10.12c	rpl701 60S ribosomal protein L7|Schizosaccharomyces pombe|chr 2|||Manual	110.939	52.19	1	10	14	32	251	28.7126	9.96436
SPBC354.12	gpd3 glyceraldehyde 3-phosphate dehydrogenase Gpd3|Schizosaccharomyces pombe|chr 2|||Manual	140.239	52.54	1	7	14	31	335	35.6523	7.88428
SPCC1183.08c	rpl101 rpl1-1, rpl10a-1|60S ribosomal protein L10a|Schizosaccharomyces pombe|chr 3|||Manual	138.062	49.54	1	7	12	31	216	23.9021	9.81787
SPCC576.11	rpl15 60S ribosomal protein L15 |Schizosaccharomyces pombe|chr 3|||Manual	109.459	44.28	1	1	9	30	201	23.7918	11.2534
SPAC23A1.10	tef102 ef1a-b|translation elongation factor EF-1 alpha Ef1a-b|Schizosaccharomyces pombe|chr 1|||Manual	122.252	43.48	2	15	15	29	460	49.6429	8.99756
SPAC3A12.10	rpl2001 rpl20-1, rpl20, yl17b, rpl18a-2|60S ribosomal protein L20a |Schizosaccharomyces pombe|chr 1|||Manual	102.382	56.82	1	12	12	29	176	20.5862	10.4185
SPBC56F2.02	rpl1901 rpl19-1|60S ribosomal protein L19|Schizosaccharomyces pombe|chr 2|||Manual	99.238	41.45	1	1	10	28	193	22.7096	11.3999
SPAC1783.08c	rpl1502 rpl15-2|60S ribosomal protein L15b |Schizosaccharomyces pombe|chr 1|||Manual	97.2547	44.28	1	1	9	27	201	23.8078	11.1802
SPAC6F6.07c	rps13 40S ribosomal protein S13 |Schizosaccharomyces pombe|chr 1|||Manual	85.1791	42.38	1	8	8	27	151	16.9423	10.3745
SPAC3H5.12c	rpl501 rpl5-1, rpl5|60S ribosomal protein L5 |Schizosaccharomyces pombe|chr 1|||Manual	131.449	60.54	2	13	13	27	294	33.4391	9.0708
SPAC3H5.07	rpl702 rpl7-2, rpl7, rpl7b|60S ribosomal protein L7|Schizosaccharomyces pombe|chr 1|||Manual	87.1426	45.2	1	10	14	26	250	28.4316	10.0669
SPCC1795.11	sum3 ded1, slh3, moc2|translation initiation RNA helicase Sum3|Schizosaccharomyces pombe|chr 3|||Manual	97.723	47.48	1	20	21	26	636	69.7158	8.49951
SPAC521.05	rps802 rps8-2|40S ribosomal protein S8 |Schizosaccharomyces pombe|chr 1|||Manual	93.0619	54	1	1	8	25	200	22.55	10.9312
SPAC22H12.04c	rps102 rps1-2, rps3a-2|40S ribosomal protein S3a |Schizosaccharomyces pombe|chr 1|||Manual	88.1374	49.6	1	7	13	25	252	28.5036	10.1401
SPAC664.05	rpl13 60S ribosomal protein L13 |Schizosaccharomyces pombe|chr 1|||Manual	109.593	56.73	1	11	11	24	208	23.5147	10.6968
SPCC622.18	rpl6 60S ribosomal protein L6 |Schizosaccharomyces pombe|chr 3|||Manual	100.151	55.9	1	11	11	24	195	21.2346	10.2573
SPAC2C4.16c	rps801 rps8-1, rps8|40S ribosomal protein S8 |Schizosaccharomyces pombe|chr 1|||Manual	89.976	54	1	1	8	24	200	22.579	10.9312
SPBC16G5.14c	rps3 40S ribosomal protein S3 |Schizosaccharomyces pombe|chr 2|||Manual	90.7129	46.99	1	10	10	23	249	27.5356	9.20264
SPBC685.07c	rpl2701 rpl27-1|60S ribosomal protein L27|Schizosaccharomyces pombe|chr 2|||Manual	80.6435	52.21	1	4	8	23	136	15.3796	10.8433
SPAC328.10c	rps502 rps5-2|40S ribosomal protein S5 |Schizosaccharomyces pombe|chr 1|||Manual	83.6426	58.62	2	12	12	22	203	22.343	9.84717
SPBC106.18	rpl2501 rpl25a|60S ribosomal protein L25 |Schizosaccharomyces pombe|chr 2|||Manual	84.2388	48.94	1	2	7	22	141	15.8259	10.4771
SPBC29A3.12	rps902 rps9-2, rps9b|40S ribosomal protein S9 |Schizosaccharomyces pombe|chr 2|||Manual	70.667	54.17	1	3	11	21	192	22.2312	10.3745
SPCC576.08c	rps2 40S ribosomal protein S2 |Schizosaccharomyces pombe|chr 3|||Manual	78.1714	37.94	1	9	9	21	253	27.6198	10.0815
SPCC1682.14	rpl1902 rpl19-2|60S ribosomal protein L19|Schizosaccharomyces pombe|chr 3|||Manual	76.7761	36.27	1	1	8	21	193	22.7396	11.3999
SPBC4F6.04	rpl2502 rpl25b, rpl23a-2|60S ribosomal protein L25 |Schizosaccharomyces pombe|chr 2|||Manual	81.2058	48.94	1	2	7	21	141	15.7578	10.4771
SPAC24H6.07	rps901 rps9-1, rps9a|40S ribosomal protein S9|Schizosaccharomyces pombe|chr 1|||Manual	67.4084	49.74	1	3	11	20	191	22.1472	10.3745
SPAC13G6.02c	rps101 rps1-1, rps3a-1|40S ribosomal protein S3a|Schizosaccharomyces pombe|chr 1|||Manual	67.4132	50.4	1	6	12	20	252	28.4704	9.99365
SPBC1921.01c	rpl35b rpl37-1, rpl37|60S ribosomal protein L35a |Schizosaccharomyces pombe|chr 2|||Manual	65.8125	48.15	1	2	5	20	108	12.1795	10.6821
SPAC22A12.04c	rps2201 rps22-1, rps15a-1|40S ribosomal protein S15a |Schizosaccharomyces pombe|chr 1|||Manual	69.1088	64.62	1	9	9	19	130	14.751	10.272
SPCC74.05	rpl2702 rpl27-2|60S ribosomal protein L27 |Schizosaccharomyces pombe|chr 3|||Manual	64.3862	52.21	1	4	8	19	136	15.2955	10.7261
SPBC16D10.11c	rps1801 rps18-1|40S ribosomal protein S18 |Schizosaccharomyces pombe|chr 2|||Manual	59.8826	59.87	1	11	11	19	152	17.4245	10.4917
SPCC613.05c	rpl35 60S ribosomal protein L35|Schizosaccharomyces pombe|chr 3|||Manual	69.2804	35.25	1	6	6	19	122	14.2931	10.7114
SPBC30D10.18c	rpl102 rpl1-2, rpl10a-2|60S ribosomal protein L10a|Schizosaccharomyces pombe|chr 2|||Manual	82.6578	25	1	1	6	19	216	23.8691	9.78857
SPBC11C11.07	rpl1801 rpl18-1, rpl18|60S ribosomal protein L18|Schizosaccharomyces pombe|chr 2|||Manual	59.0612	43.32	1	2	8	19	187	21.1769	11.6636
SPAPB17E12.13	rpl1802 rpl18-2|60S ribosomal protein L18 |Schizosaccharomyces pombe|chr 1|||Manual	56.6499	43.32	1	2	8	18	187	21.171	11.6343
SPCC24B10.09	rps1702 rps17-2, rps17|40S ribosomal protein S17 |Schizosaccharomyces pombe|chr 3|||Manual	61.1415	57.58	1	6	10	18	132	15.5244	10.1255
SPBC839.05c	rps1701 rps17-1|40S ribosomal protein S17 |Schizosaccharomyces pombe|chr 2|||Manual	63.7364	55.73	1	6	10	18	131	15.5044	10.3013
SPBC18E5.04	rpl1001 rpl10-1, rpl10|60S ribosomal protein L10|Schizosaccharomyces pombe|chr 2|||Manual	54.3404	24.43	1	1	7	18	221	25.3573	10.0522
SPCC330.14c	rpl2402 rpl24-2|60S ribosomal protein L24 |Schizosaccharomyces pombe|chr 3|||Manual	48.7776	38.93	2	10	10	17	149	16.9014	11.6489
SPAC926.09c	fas1 fatty acid synthase beta subunit Fas1|Schizosaccharomyces pombe|chr 1|||Manual	60.1249	12.06	1	17	17	17	2073	230.416	6.37939
SPAC144.11	rps1102 rps11-2, rps11|40S ribosomal protein S11 |Schizosaccharomyces pombe|chr 1|||Manual	66.2562	46.05	1	8	8	17	152	17.4894	10.3745
SPBC32H8.12c	act1 cps8|actin Act1|Schizosaccharomyces pombe|chr 2|||Manual	78.3257	48	1	11	11	17	375	41.7379	5.47803
SPAC4A8.11c	fas2 lsd1|fatty acid synthase alpha subunit Lsd1|Schizosaccharomyces pombe|chr 1|||Manual	60.7721	11.67	1	16	16	17	1842	202.043	6.17627
SPAC1687.06c	rpl44 rpl28|60S ribosomal protein L28/L44 |Schizosaccharomyces pombe|chr 1|||Manual	51.0398	38.06	1	6	6	16	134	14.746	11.2241
SPBP8B7.16c	dbp2 ATP-dependent RNA helicase Dbp2|Schizosaccharomyces pombe|chr 2|||Manual	54.5103	27.27	1	12	13	16	550	61.5101	9.20264
SPAC32A11.04c	tif212 tif22, SPAC6B12.17c|translation initiation factor eIF2 beta subunit |Schizosaccharomyces pombe|chr 1|||Manual	57.7726	50.78	1	14	14	16	321	35.9382	8.27979
SPAC18G6.14c	rps7 40S ribosomal protein S7 |Schizosaccharomyces pombe|chr 1|||Manual	69.4596	52.31	1	8	8	16	195	21.9339	10.1401
SPBC776.11	rpl2801 rpl28-1|60S ribosomal protein L27/L28|Schizosaccharomyces pombe|chr 2|||Manual	53.7049	54.73	1	3	8	16	148	16.6751	11.063
SPAC17G6.06	rps2401 rps24-1, rps24|40S ribosomal protein S24 |Schizosaccharomyces pombe|chr 1|||Manual	61.5094	46.27	1	4	8	16	134	15.4604	10.9312
SPCC5E4.07	rpl2802 rpl28-2, rpl28|60S ribosomal protein L27/L28|Schizosaccharomyces pombe|chr 3|||Manual	53.9613	58.78	1	4	9	16	148	16.6431	11.063
SPAP7G5.05	rpl1002 rpl10-2, rpl10|60S ribosomal protein L10|Schizosaccharomyces pombe|chr 1|||Manual	45.8118	24.43	1	1	7	15	221	25.3433	10.0522
SPAC1805.13	rpl14 60S ribosomal protein L14 |Schizosaccharomyces pombe|chr 1|||Manual	48.6291	45.52	1	7	7	15	134	15.2004	10.3452
SPAC26A3.07c	rpl1101 rpl11-1, rpl11|60S ribosomal protein L11 |Schizosaccharomyces pombe|chr 1|||Manual	52.0792	48.85	1	7	7	15	174	19.8786	10.0669
SPCC364.03	rpl1702 rpl17-2, rpl17|60S ribosomal protein L17 |Schizosaccharomyces pombe|chr 3|||Manual	61.281	34.76	1	2	5	15	187	20.8141	10.3306
SPAC926.04c	hsp90 swo1, git10|Hsp90 chaperone|Schizosaccharomyces pombe|chr 1|||Manual	49.308	20.74	1	12	12	14	704	80.5461	4.95752
SPCC18.14c	rpp0 60S acidic ribosomal protein Rpp0 |Schizosaccharomyces pombe|chr 3|||Manual	60.4028	43.27	1	8	8	14	312	33.5441	4.76709
SPBC2F12.04	rpl1701 rpl17, rpl17-1|60S ribosomal protein L17|Schizosaccharomyces pombe|chr 2|||Manual	58.2388	29.41	1	1	4	14	187	20.8012	10.3599
SPBC17G9.09	tif213 translation initiation factor eIF2 gamma subunit |Schizosaccharomyces pombe|chr 2|||Manual	58.3535	26.23	1	8	8	14	446	48.7499	8.39697
SPAC1F8.07c	pyruvate decarboxylase |Schizosaccharomyces pombe|chr 1|||Manual	52.7086	29.23	1	12	12	14	568	61.5081	5.5542
SPBC29B5.03c	rpl26 60S ribosomal protein L26 |Schizosaccharomyces pombe|chr 2|||Manual	45.5341	42.86	1	7	7	14	126	14.3321	11.1655
SPBC16H5.12c	SPNGAF91 conserved fungal protein|Schizosaccharomyces pombe|chr 2|||Manual	57.9906	28.77	1	14	14	14	737	82.4695	5.75732
SPAC1071.10c	pma1 P-type proton ATPase, P3-type Pma1|Schizosaccharomyces pombe|chr 1|||Manual	54.647	17.85	2	12	12	13	919	99.8204	5.18604
SPAC1071.07c	rps1502 rps15-2, rps15|40S ribosomal protein S15 |Schizosaccharomyces pombe|chr 1|||Manual	47.9748	30.52	1	2	4	13	154	17.6225	10.3892
SPCC1393.03	rps1501 rps15-1|40S ribosomal protein S15 |Schizosaccharomyces pombe|chr 3|||Manual	51.885	30.72	1	2	4	13	153	17.5085	10.3892
SPBC17G9.07	rps2402 rps24-2|40S ribosomal protein S24 |Schizosaccharomyces pombe|chr 2|||Manual	48.6973	46.27	1	3	7	13	134	15.5294	10.9165
SPCC417.08	tef3 translation elongation factor eEF3|Schizosaccharomyces pombe|chr 3|||Manual	41.5119	15.28	1	13	13	13	1047	115.729	6.49365
SPAC4H3.01	DNAJ domain protein Caj1/Djp1 type |Schizosaccharomyces pombe|chr 1|||Manual	42.528	40.05	1	11	11	12	392	44.741	6.49365
SPBP8B7.06	rpp201 rpp2, rpp2-1|60S acidic ribosomal protein P2A subunit |Schizosaccharomyces pombe|chr 2|||Manual	47.6455	98.18	1	3	6	12	110	11.1514	4.04346
SPCC13B11.01	adh1 adh|alcohol dehydrogenase Adh1|Schizosaccharomyces pombe|chr 3|||Manual	46.3731	38.57	1	9	9	12	350	37.372	6.93213
SPBC16C6.11	rpl3201 rpl32-1|60S ribosomal protein L32|Schizosaccharomyces pombe|chr 2|||Manual	37.9182	37.8	1	2	6	12	127	14.4359	11.0483
SPBC16A3.08c	Stm1 homolog |Schizosaccharomyces pombe|chr 2|||Manual	43.8956	36.27	1	8	8	12	284	30.931	10.1401
SPAC589.10c	ribomal-ubiquitin fusion protein Ubi5 |Schizosaccharomyces pombe|chr 1|||Manual	40.6949	46	4	8	8	12	150	17.2043	9.75928
SPAC17A2.13c	rad25 14-3-3 protein Rad25|Schizosaccharomyces pombe|chr 1|||Manual	42.2375	41.48	1	7	9	12	270	30.35	4.84326
SPAC110.04c	pss1 ssp1, SPAP14E8.01c|heat shock protein Pss1|Schizosaccharomyces pombe|chr 1|||Manual	42.2304	18.75	1	11	11	12	720	80.3255	5.07178
SPAC664.04c	rps1602 rps16-2, rps16|40S ribosomal protein S16 |Schizosaccharomyces pombe|chr 1|||Manual	39.7543	55	1	8	8	12	140	15.3854	10.1255
SPBC1815.01	eno101 eno1|enolase |Schizosaccharomyces pombe|chr 2|||Manual	52.7183	33.49	1	9	9	12	439	47.4064	6.66846
SPBC646.10c	U3 snoRNP protein Nop56 |Schizosaccharomyces pombe|chr 2|||Manual	47.0738	31.79	1	11	11	12	497	55.354	8.89502
SPAC9G1.03c	rpl3001 rpl30-1, rpl30|60S ribosomal protein L30 |Schizosaccharomyces pombe|chr 1|||Manual	52.7282	55.05	1	5	5	12	109	11.5842	9.67139
SPAC23A1.11	rpl1602 rpl16-2|60S ribosomal protein L13/L16 |Schizosaccharomyces pombe|chr 1|||Manual	53.5867	24.87	3	4	4	12	197	21.9912	10.5503
SPBC660.11	tcg1 mug187|single-stranded telomeric binding protein Tgc1|Schizosaccharomyces pombe|chr 2|||Manual	39.4551	36.1	1	10	10	12	349	37.9802	5.61768
SPBC2D10.10c	fib1 fib|fibrillarin|Schizosaccharomyces pombe|chr 2|||Manual	40.296	36.72	1	9	9	11	305	32.0208	10.1694
SPAC3H5.10	rpl3202 rpl32-2, rpl32|60S ribosomal protein L32 |Schizosaccharomyces pombe|chr 1|||Manual	37.816	32.28	1	1	5	11	127	14.4489	11.1802
SPAC890.08	rpl31 60S ribosomal protein L31 |Schizosaccharomyces pombe|chr 1|||Manual	41.8901	41.59	1	6	6	11	113	13.2531	10.2427
SPCC663.04	rpl39 60S ribosomal protein L39|Schizosaccharomyces pombe|chr 3|||Manual	36.3448	39.22	1	2	2	11	51	6.3045	12.5425
SPCP1E11.11	puf6 Puf family RNA-binding protein Puf6 |Schizosaccharomyces pombe|chr 3|||Manual	33.8919	17.29	1	10	10	11	642	72.589	8.86572
SPAC4G9.16c	rpl901 rpl9-1|60S ribosomal protein L9|Schizosaccharomyces pombe|chr 1|||Manual	45.7207	50	1	2	8	11	190	21.4994	9.46631
SPBC1D7.04	mlo3 RNA binding protein Mlo3|Schizosaccharomyces pombe|chr 2|||Manual	33.3104	38.19	1	7	7	10	199	21.7776	10.2134
SPBP22H7.08	rps1002 rps10-2, rps10B|40S ribosomal protein S10 |Schizosaccharomyces pombe|chr 2|||Manual	40.8673	45.58	1	4	6	10	147	16.4326	9.93506
SPCC1827.03c	acetyl-CoA ligase |Schizosaccharomyces pombe|chr 3|||Manual	31.8777	21.68	1	10	10	10	512	56.2386	9.29053
SPCC613.06	rpl902 rpl9-2|60S ribosomal protein L9|Schizosaccharomyces pombe|chr 3|||Manual	39.2322	42.86	1	3	8	10	189	21.3685	9.5835
SPAC31G5.17c	rps1001 rps10-1|40S ribosomal protein S10 |Schizosaccharomyces pombe|chr 1|||Manual	41.9652	45.83	1	4	6	10	144	16.2655	9.93506
SPBC19F5.05c	ppp1 SPBC25D12.01c|pescadillo-family BRCT domain protein |Schizosaccharomyces pombe|chr 2|||Manual	36.8144	19.28	1	10	10	10	607	69.1464	7.13721
SPAC6B12.12	tom70 mitochondrial TOM complex subunit Tom70 |Schizosaccharomyces pombe|chr 1|||Manual	32.2266	16.8	1	9	9	9	625	69.4732	8.04541
SPCC1322.11	rpl2302 rpl23-2|60S ribosomal protein L23|Schizosaccharomyces pombe|chr 3|||Manual	32.8068	46.76	1	5	5	9	139	14.8729	10.2134
SPBC365.03c	rpl2101 rpl21, rpl21-1|60S ribosomal protein L21 |Schizosaccharomyces pombe|chr 2|||Manual	40.8248	35.63	1	2	4	9	160	18.3687	10.1841
SPBC83.08	rvb2 AAA family ATPase Rvb2|Schizosaccharomyces pombe|chr 2|||Manual	30.2203	24.3	1	9	9	9	465	51.5295	5.38916
SPAC25G10.08	translation initiation factor eIF3b |Schizosaccharomyces pombe|chr 1|||Manual	32.7812	15.59	1	9	9	9	725	83.9826	5.49072
SPAC3H5.05c	rps1401 rps14-1, rps14|40S ribosomal protein S14 |Schizosaccharomyces pombe|chr 1|||Manual	39.9456	39.57	1	5	5	9	139	14.6898	10.6675
SPBC800.04c	rpl4301 rpl43-1, rpl43, rpl37a-1|60S ribosomal protein L37a |Schizosaccharomyces pombe|chr 2|||Manual	34.2479	50	1	3	6	9	94	10.4155	10.7847
SPAC1071.08	rpp203 rpp2-3, rla6|60S acidic ribosomal protein P2C subunit|Schizosaccharomyces pombe|chr 1|||Manual	36.7084	88.18	1	2	5	9	110	11.1075	4.11963
SPCC970.05	rpl3601 rpl36-1|60S ribosomal protein L36|Schizosaccharomyces pombe|chr 3|||Manual	29.7515	37.37	3	5	5	9	99	11.2565	11.8394
SPBC16H5.02	pfk1 6-phosphofructokinase |Schizosaccharomyces pombe|chr 2|||Manual	31.0512	14.01	1	9	9	9	942	102.491	6.18896
SPAC959.08	rpl2102 rpl21-2, rpl21|60S ribosomal protein L21 |Schizosaccharomyces pombe|chr 1|||Manual	42.9396	35.63	1	2	4	8	160	18.3417	10.1694
SPAC29A4.04c	cbf5 pseudouridylate synthase Cbf5 |Schizosaccharomyces pombe|chr 1|||Manual	31.714	22.57	1	6	6	8	474	53.0769	8.96826
SPCC132.01c	SPCC1322.17c nuclear export mediator factor NEMF|Schizosaccharomyces pombe|chr 3|||Manual	24.4372	11.36	1	8	8	8	1021	114.169	7.89893
SPBC651.01c	nog1 SPBC725.18c|GTP binding protein Nog1 |Schizosaccharomyces pombe|chr 2|||Manual	30.5531	18.22	1	8	8	8	642	72.7541	9.23193
SPBC713.02c	ubp15 ubpD, ubp21|ubiquitin C-terminal hydrolase Ubp15|Schizosaccharomyces pombe|chr 2|||Manual	26.3812	9.39	1	8	8	8	1129	130.75	5.50342
SPBC14C8.16c	bot1 mitochondrial ribosomal protein subunit S35|Schizosaccharomyces pombe|chr 2|||Manual	24.1879	28.25	1	8	8	8	315	35.7302	9.5542
SPBC691.04	mitochondrial ATP-dependent RNA helicase Mss116 |Schizosaccharomyces pombe|chr 2|||Manual	31.4203	23.36	1	8	8	8	535	59.4124	10.0962
SPBC1734.11	mas5 DNAJ domain protein Mas5 |Schizosaccharomyces pombe|chr 2|||Manual	34.3186	26.78	1	7	7	8	407	44.7925	6.59521
SPBC800.06	brx1 ribosome biogenesis protein Brx1 |Schizosaccharomyces pombe|chr 2|||Manual	23.4888	27.12	1	6	6	7	295	33.8786	9.21729
SPAC1420.02c	cct5 chaperonin-containing T-complex epsilon subunit Cct5|Schizosaccharomyces pombe|chr 1|||Manual	22.3945	16.12	1	6	6	7	546	59.3402	6.25244
SPBC1A4.08c	cct3 chaperonin-containing T-complex gamma subunit Cct3|Schizosaccharomyces pombe|chr 2|||Manual	23.145	16.48	1	7	7	7	528	58.4435	7.25439
SPAC11E3.15	rpl22 SPAP8A3.01|60S ribosomal protein L22 |Schizosaccharomyces pombe|chr 1|||Manual	22.14	36.75	1	4	4	7	117	13.3122	9.64209
SPBC23G7.15c	rpp202 rpp2-2|60S acidic ribosomal protein P2B subunit|Schizosaccharomyces pombe|chr 2|||Manual	25.6989	53.64	1	3	4	7	110	11.1134	4.00537
SPBC3D6.15	rps2501 rps25-1|40S ribosomal protein S25 |Schizosaccharomyces pombe|chr 2|||Manual	23.0835	31.82	2	4	4	7	88	9.81346	10.3745
SPBP4H10.13	rps2302 rps23-2|40S ribosomal protein S23 |Schizosaccharomyces pombe|chr 2|||Manual	30.1635	42.66	1	5	5	7	143	15.6456	10.3159
SPCC16C4.13c	rpl1201 rpl12-1, rpl12.1|60S ribosomal protein L12.1/L12A|Schizosaccharomyces pombe|chr 3|||Manual	32.4588	39.39	1	4	4	7	165	17.6555	9.30518
SPAC20G8.09c	ribosome biogenesis ATPase |Schizosaccharomyces pombe|chr 1|||Manual	23.1726	7.84	1	6	6	7	1033	116.391	7.81104
SPAC4A8.16c	tif33 SPAC823.01c|translation initiation factor eIF3c|Schizosaccharomyces pombe|chr 1|||Manual	21.21	8.17	1	7	7	7	918	104.303	4.94482
SPCC1322.15	rpl3402 rpl34, rpl34-2|60S ribosomal protein L34|Schizosaccharomyces pombe|chr 3|||Manual	29.0147	32.43	2	3	3	7	111	12.7921	11.3706
SPAC1805.11c	rps2602 rps26-2|40S ribosomal protein S26 |Schizosaccharomyces pombe|chr 1|||Manual	20.0144	27.73	1	2	3	6	119	13.8535	11.2534
SPBC3B9.14c	mrpl3 mitochondrial ribosomal protein subunit L3 |Schizosaccharomyces pombe|chr 2|||Manual	18.4212	20.86	1	6	6	6	326	37.1717	9.74463
SPAC926.08c	Brix domain protein Rpf2 |Schizosaccharomyces pombe|chr 1|||Manual	24.144	19.87	1	4	4	6	317	36.0491	8.96826
SPBC354.10	def1 RNAPII degradation factor Def1 |Schizosaccharomyces pombe|chr 2|||Manual	22.7418	10.07	1	5	5	6	963	100.073	9.45166
SPAC23G3.06	U3 snoRNP protein Nop58 |Schizosaccharomyces pombe|chr 1|||Manual	24.5153	16.93	1	6	6	6	508	55.7246	9.05615
SPAC6B12.15	cpc2 rkp1|RACK1 ortholog Cpc2|Schizosaccharomyces pombe|chr 1|||Manual	18.4488	25.48	1	6	6	6	314	34.8292	5.75732
SPCC576.09	rps20 40S ribosomal protein S20 |Schizosaccharomyces pombe|chr 3|||Manual	19.1224	41.53	1	4	4	6	118	13.5354	10.0522
SPAC513.01c	eft201 eft2-1, etf2, SPAPYUK71.04c|translation elongation factor 2 |Schizosaccharomyces pombe|chr 1|||Manual	20.9945	10.21	1	6	6	6	842	93.1716	6.43018
SPBC530.10c	anc1 mitochondrial adenine nucleotide carrier Anc1|Schizosaccharomyces pombe|chr 2|||Manual	20.4996	20.19	1	6	6	6	322	34.9981	9.96436
SPAC8E11.02c	rad24 14-3-3 protein Rad24|Schizosaccharomyces pombe|chr 1|||Manual	17.2557	18.89	1	3	5	6	270	30.0639	4.71631
SPBC26H8.08c	grn1 GTPase Grn1|Schizosaccharomyces pombe|chr 2|||Manual	18.44	16.17	1	6	6	6	470	52.4023	8.85107
SPBC26H8.07c	nda3 ben1, alp12|tubulin beta Nda3|Schizosaccharomyces pombe|chr 2|||Manual	22.8965	20.98	1	6	6	6	448	49.44	4.85596
SPBC8D2.03c	hhf2 ams3, h4.2|histone H4 h4.2|Schizosaccharomyces pombe|chr 2|||Manual	19.1145	42.72	1	4	4	6	103	11.4165	11.356
SPCP1E11.09c	rpp103 rpp1-3|60S acidic ribosomal protein Rpp1-3|Schizosaccharomyces pombe|chr 3|||Manual	24.4939	62.39	1	2	3	6	109	11.2096	4.11963
SPBC83.02c	rpl4302 rpl43-2, rpl43, rpl37a-2|60S ribosomal protein L37a |Schizosaccharomyces pombe|chr 2|||Manual	19.6466	37.23	1	1	4	6	94	10.3735	11.0044
SPAC17G6.13	slt1 sequence orphan Slt1|Schizosaccharomyces pombe|chr 1|||Manual	21.5313	13.39	1	5	5	6	433	49.1072	4.97021
SPAC1527.03	RNA-binding protein |Schizosaccharomyces pombe|chr 1|||Manual	20.4839	12.21	1	4	4	6	475	53.2004	9.0415
SPAC17C9.03	tif471 translation initiation factor eIF4G|Schizosaccharomyces pombe|chr 1|||Manual	21.0904	6.34	1	6	6	6	1403	153.942	9.23193
SPAC806.03c	rps2601 rps26-1, rps26|40S ribosomal protein S26 |Schizosaccharomyces pombe|chr 1|||Manual	18.136	37.5	1	3	4	6	120	13.8675	11.2241
SPBP4H10.15	aconitate hydratase/mitochondrial ribosomal protein subunit L49, fusion protein |Schizosaccharomyces pombe|chr 2|||Manual	19.1787	8.71	1	6	6	6	918	99.8381	7.84033
SPAPB17E12.05	rpl3703 rpl37|60S ribosomal protein L37 |Schizosaccharomyces pombe|chr 1|||Manual	13.339	22.47	2	2	2	5	89	9.95405	11.4585
SPBC649.02	rps1902 rps19-2, rps19|40S ribosomal protein S19 |Schizosaccharomyces pombe|chr 2|||Manual	13.8857	27.97	2	4	4	5	143	16.0523	9.62744
SPAC17H9.05	ebp2 rRNA processing protein Ebp2 |Schizosaccharomyces pombe|chr 1|||Manual	22.4279	22.82	1	5	5	5	333	37.7959	9.45166
SPBC2F12.05c	sterol binding ankyrin repeat protein |Schizosaccharomyces pombe|chr 2|||Manual	15.0855	4.5	1	5	5	5	1310	148.384	7.31299
SPBP8B7.20c	RNA methyltransferase Nop2 |Schizosaccharomyces pombe|chr 2|||Manual	14.5117	8.72	1	5	5	5	608	68.8926	5.13525
SPCP1E11.08	ribosome biogenesis protein Nsa2 |Schizosaccharomyces pombe|chr 3|||Manual	18.2053	24.23	1	5	5	5	260	29.687	10.1987
SPAC16.02c	srp2 mRNA export factor Srp2|Schizosaccharomyces pombe|chr 1|||Manual	21.1027	17.53	1	5	5	5	365	42.5405	6.99072
SPAC664.06	rlp7 rpl7|ribosomal protein L7-like Rlp7 involved in ribosome biogenesis |Schizosaccharomyces pombe|chr 1|||Manual	15.368	21.69	1	5	5	5	249	29.147	10.0815
SPBC18H10.03	tif35 translation initiation factor eIF3g|Schizosaccharomyces pombe|chr 2|||Manual	16.6536	15.6	1	5	5	5	282	31.475	9.14404
SPCP31B10.08c	rpl35a rpl33|60S ribosomal protein L35a|Schizosaccharomyces pombe|chr 3|||Manual	19.0057	22.22	1	1	3	5	108	12.1005	10.5503
SPBC17D11.05	tif32 translation initiation factor eIF3a|Schizosaccharomyces pombe|chr 2|||Manual	15.5804	5.79	1	5	5	5	932	107.005	8.86572
SPAC3A12.14	cam1 calmodulin Cam1|Schizosaccharomyces pombe|chr 1|||Manual	23.2315	34.67	1	5	5	5	150	16.895	4.28467
SPBC29A10.02	spo5 mrb1, mug12, SPBC365.18|meiotic RNA-binding protein 1|Schizosaccharomyces pombe|chr 2|||Manual	18.2924	9.7	1	4	4	5	567	62.9059	9.01221
SPCC4G3.14	mdj1 mitochondrial DNAJ domain protein Mdj1 |Schizosaccharomyces pombe|chr 3|||Manual	15.4419	8.52	1	4	4	5	528	57.1531	9.34912
SPAC9E9.09c	aldehyde dehydrogenase |Schizosaccharomyces pombe|chr 1|||Manual	20.0761	15.9	1	5	5	5	503	54.7336	6.7417
SPBC337.05c	cct8 chaperonin-containing T-complex theta subunit Cct8|Schizosaccharomyces pombe|chr 2|||Manual	14.4959	8.79	1	5	5	5	546	59.9182	5.31299
SPBC1347.05c	DNAJ domain protein Scj1 |Schizosaccharomyces pombe|chr 2|||Manual	15.685	15.08	1	5	5	5	398	44.2591	7.86963
SPCC576.10c	rpt3 19S proteasome regulatory subunit Rpt3 |Schizosaccharomyces pombe|chr 3|||Manual	14.0753	13.62	3	4	4	4	389	43.5258	5.41455
SPAC4D7.05	sum1 tif34|translation initiation factor eIF3i|Schizosaccharomyces pombe|chr 1|||Manual	10.3367	9.76	1	4	4	4	328	36.7883	6.1001
SPBC11G11.03	mrt4 mRNA turnover and ribosome assembly protein Mrt4 |Schizosaccharomyces pombe|chr 2|||Manual	16.0763	27.39	1	4	4	4	241	26.6468	8.52881
SPBP8B7.11	nxt3 glp1|ubiquitin protease cofactor Glp1 |Schizosaccharomyces pombe|chr 2|||Manual	18.8438	15.9	1	4	4	4	434	47.9429	5.38916
SPBP8B7.21	ubp3 ubiquitin C-terminal hydrolase Ubp3|Schizosaccharomyces pombe|chr 2|||Manual	13.7216	12.5	1	4	4	4	512	58.0454	7.03467
SPAC3G9.09c	tif211 eIF2alpha|translation initiation factor eIF2 alpha subunit|Schizosaccharomyces pombe|chr 1|||Manual	15.9206	17.65	1	4	4	4	306	34.504	6.46826
SPBC12D12.03	cct1 chaperonin-containing T-complex alpha subunit Cct1|Schizosaccharomyces pombe|chr 2|||Manual	13.3625	8.27	1	4	4	4	556	60.0096	6.75635
SPAC57A7.04c	pabp mRNA export shuttling protein|Schizosaccharomyces pombe|chr 1|||Manual	12.2819	7.35	1	4	4	4	653	71.4676	5.37646
SPBC11C11.06c	sequence orphan|Schizosaccharomyces pombe|chr 2|||Manual	11.4685	13.48	1	2	2	4	178	19.1147	6.53662
SPAC458.02c	mRNP complex |Schizosaccharomyces pombe|chr 1|||Manual	12.8793	8.97	1	4	4	4	468	53.7032	8.98291
SPAPB8E5.09	rvb1 AAA family ATPase Rvb1|Schizosaccharomyces pombe|chr 1|||Manual	15.0743	14.69	1	4	4	4	456	50.0211	5.79541
SPCC1827.05c	nucleolar RNA-binding protein NIFK |Schizosaccharomyces pombe|chr 3|||Manual	12.9421	13.04	1	3	3	4	276	31.3847	9.80322
SPAC4F8.05c	mrpl28 mitochondrial ribosomal protein subunit L28 |Schizosaccharomyces pombe|chr 1|||Manual	10.6726	33.05	1	4	4	4	118	13.7841	9.94971
SPBC19C2.12	mrpl51 mitochondrial ribosomal protein subunit L51 |Schizosaccharomyces pombe|chr 2|||Manual	12.7656	22.07	1	3	3	4	145	16.5446	9.80322
SPAC24C9.12c	glycine hydroxymethyltransferase |Schizosaccharomyces pombe|chr 1|||Manual	14.7689	10.92	1	4	4	4	467	51.8282	7.81104
SPAP27G11.13c	nop10 snoRNP pseudouridylase box H/ACA snoRNP complex protein |Schizosaccharomyces pombe|chr 1|||Manual	15.8984	40.63	1	3	3	4	64	7.65306	10.1108
SPBC28F2.02	mep33 mRNA export protein Mep33|Schizosaccharomyces pombe|chr 2|||Manual	11.2101	15.41	1	4	4	4	292	33.2612	9.31982
SPAC1751.03	SPAC31A2.01 translation initiation factor eIF3m|Schizosaccharomyces pombe|chr 1|||Manual	13.7442	14.18	1	4	4	4	402	45.0571	5.08447
SPAC1782.10c	nhp2 box H/ACA snoRNP complex subunit Nhp2|Schizosaccharomyces pombe|chr 1|||Manual	14.7936	16.88	1	2	2	4	154	17.1672	9.20264
SPAC15E1.03	rpl42 rpl36a|60S ribosomal protein L36/L42|Schizosaccharomyces pombe|chr 1|||Manual	10.7016	15.09	1	3	3	4	106	12.1977	10.4185
SPAC22F8.09	rrp16 nop53|rRNA processing protein Rrp16 |Schizosaccharomyces pombe|chr 1|||Manual	13.2503	13.37	1	4	4	4	419	48.1007	9.72998
SPAC644.17c	mrpl9 mitochondrial ribosomal protein subunit L9 |Schizosaccharomyces pombe|chr 1|||Manual	14.6049	22.01	1	4	4	4	259	28.5491	10.4917
SPBC25H2.12c	cct7 chaperonin-containing T-complex eta subunit Cct7|Schizosaccharomyces pombe|chr 2|||Manual	14.4383	10.22	1	4	4	4	558	60.6483	5.75732
SPAC8F11.04	U3 snoRNP-associated protein Cic1/Utp30 family |Schizosaccharomyces pombe|chr 1|||Manual	12.1036	14.21	1	4	4	4	373	41.3324	9.74463
SPAC56E4.04c	cut6 acetyl-CoA/biotin carboxylase|Schizosaccharomyces pombe|chr 1|||Manual	11.8612	2.24	1	4	4	4	2280	256.682	6.44287
SPAC1250.05	rpl3002 rpl30-2, rpl30|60S ribosomal protein L30 |Schizosaccharomyces pombe|chr 1|||Manual	13.4697	41.03	1	4	4	4	117	12.2346	9.81787
SPCC16C4.15	rml2 mitochondrial ribosomal protein subunit L2 |Schizosaccharomyces pombe|chr 3|||Manual	12.2237	15.19	1	4	4	4	362	40.2216	10.4624
SPAC6G10.08	idp1 isocitrate dehydrogenase Idp1 |Schizosaccharomyces pombe|chr 1|||Manual	15.283	12.07	1	4	4	4	439	49.4472	8.98291
SPAC22E12.13c	rlp24 ribosomal L24-like protein involved in ribosome biogenesis Rlp24 |Schizosaccharomyces pombe|chr 1|||Manual	8.70137	10.94	1	3	3	3	192	22.2655	9.93506
SPBC23E6.07c	rfc1 DNA replication factor C complex subunit Rfc1|Schizosaccharomyces pombe|chr 2|||Manual	7.91255	3.64	1	3	3	3	934	103.425	9.08545
SPBC3E7.02c	hsp16 heat shock protein Hsp16|Schizosaccharomyces pombe|chr 2|||Manual	10.176	27.27	1	3	3	3	143	15.9582	5.99854
SPAC1687.03c	rfc4 DNA replication factor C complex subunit Rfc4 |Schizosaccharomyces pombe|chr 1|||Manual	10.9264	10.23	1	3	3	3	342	37.6306	7.00537
SPBC660.16	phosphogluconate dehydrogenase, decarboxylating|Schizosaccharomyces pombe|chr 2|||Manual	10.9248	9.55	1	3	3	3	492	53.6453	7.13721
SPBC29A3.16	rrs1 ribosome biogenesis protein Rrs1 |Schizosaccharomyces pombe|chr 2|||Manual	12.6829	24.1	1	3	3	3	166	19.0322	9.80322
SPAC56F8.03	translation initiation factor IF2 |Schizosaccharomyces pombe|chr 1|||Manual	10.4987	5	1	3	3	3	1079	119.857	5.73193
SPBC1685.09	rps29 40S ribosomal protein S29 |Schizosaccharomyces pombe|chr 2|||Manual	7.3768	32.14	1	3	3	3	56	6.65343	10.6821
SPAC3G9.11c	pyruvate decarboxylase |Schizosaccharomyces pombe|chr 1|||Manual	10.0822	5.79	1	2	2	3	570	62.6142	5.70654
SPBC4F6.18c	arf1 ADP-ribosylation factor, Arf family Arf1|Schizosaccharomyces pombe|chr 2|||Manual	9.85109	19.44	1	3	3	3	180	20.6056	6.20166
SPAC1F7.02c	has1 ATP-dependent RNA helicase Has1 |Schizosaccharomyces pombe|chr 1|||Manual	9.59497	5.71	1	3	3	3	578	65.2211	8.93896
SPAC821.05	translation initiation factor eIF3h |Schizosaccharomyces pombe|chr 1|||Manual	11.8583	11.48	1	3	3	3	357	39.756	5.40186
SPBC2D10.08c	mitochondrial ribosomal protein subunit Yml6 |Schizosaccharomyces pombe|chr 2|||Manual	8.52513	12.64	1	3	3	3	261	29.5314	9.72998
SPBC2F12.02c	mrpl7 mitochondrial ribosomal protein subunit L7 |Schizosaccharomyces pombe|chr 2|||Manual	9.38582	12.54	1	3	3	3	287	32.364	9.67139
SPAC140.02	gar2 nucleolar protein required for rRNA processing|Schizosaccharomyces pombe|chr 1|||Manual	8.56952	7	1	3	3	3	500	52.9561	4.97021
SPBC19C2.07	fba1 fructose-bisphosphate aldolase Fba1|Schizosaccharomyces pombe|chr 2|||Manual	15.6707	10.89	1	2	2	3	358	39.5449	6.354
SPBC56F2.04	utp20 U3 snoRNP protein Utp20 |Schizosaccharomyces pombe|chr 2|||Manual	8.37864	1.44	1	3	3	3	2493	285.047	6.94678
SPBC4F6.06	kin1 microtubule affinity-regulating kinase Kin1|Schizosaccharomyces pombe|chr 2|||Manual	8.55579	4.26	1	3	3	3	891	98.6881	9.80322
SPCC1183.07	U3 snoRNP-associated protein Rrp5 |Schizosaccharomyces pombe|chr 3|||Manual	11.7148	2.78	1	3	3	3	1690	187.407	5.49072
SPBC646.07c	enoyl reductase |Schizosaccharomyces pombe|chr 2|||Manual	10.1482	13.56	1	3	3	3	295	34.6176	10.1987
SPBC1604.09c	exoribonuclease Rex4 |Schizosaccharomyces pombe|chr 2|||Manual	9.15217	13.85	1	3	3	3	260	29.5835	9.70068
SPBC11B10.04c	mrps28 mitochondrial ribosomal protein subunit S28 |Schizosaccharomyces pombe|chr 2|||Manual	10.1095	11.81	1	3	3	3	288	33.9309	9.81787
SPCC962.04	rps1201 rps12-1, rps12|40S ribosomal protein S12 |Schizosaccharomyces pombe|chr 3|||Manual	12.355	31.72	1	2	3	3	145	15.6058	4.55127
SPBC4C3.07	translation initiation factor eIF3f|Schizosaccharomyces pombe|chr 2|||Manual	12.6307	14.57	1	3	3	3	302	33.2301	6.37939
SPCC1494.06c	ATP-dependent RNA helicase Dbp9 |Schizosaccharomyces pombe|chr 3|||Manual	11.6987	7.73	1	3	3	3	595	67.4089	9.30518
SPBC713.07c	vacuolar polyphosphatase |Schizosaccharomyces pombe|chr 2|||Manual	11.2397	8.84	1	3	3	3	577	65.9836	5.66846
SPAC4H3.10c	pyk1 pyruvate kinase |Schizosaccharomyces pombe|chr 1|||Manual	8.6349	7.66	1	3	3	3	509	55.4795	7.95752
SPAC644.15	rpp101 rpp1-1|60S acidic ribosomal protein Rpp1-1|Schizosaccharomyces pombe|chr 1|||Manual	10.6315	32.11	2	1	2	3	109	11.1345	4.04346
SPBC19G7.10c	topoisomerase II-associated deadenylation-dependent mRNA-decapping factor |Schizosaccharomyces pombe|chr 2|||Manual	11.1017	5.17	1	3	3	3	754	84.0647	5.12256
SPAC27E2.10c	rfc3 SPAPJ698.01c|DNA replication factor C complex subunit Rfc3|Schizosaccharomyces pombe|chr 1|||Manual	9.01797	12.57	1	3	3	3	342	38.4148	7.86963
SPBC776.15c	kgd2 dihydrolipoamide S-succinyltransferase, e2 component of oxoglutarate dehydrogenase complex Kdg2 |Schizosaccharomyces pombe|chr 2|||Manual	9.12016	8.19	1	3	3	3	452	48.9332	7.7085
SPBC1685.02c	rps1202 rps12-2|40S ribosomal protein S12 |Schizosaccharomyces pombe|chr 2|||Manual	11.8802	31.08	1	2	3	3	148	15.8609	4.64014
SPBC29B5.01	atf1 mts1, sss1, gad7|transcription factor, Atf-CREB family Atf1|Schizosaccharomyces pombe|chr 2|||Manual	12.7531	9.19	1	3	3	3	566	59.6749	5.96045
SPBC2F12.10	mitochondrial ribosomal protein subunit L35 |Schizosaccharomyces pombe|chr 2|||Manual	8.40716	11.36	1	3	3	3	308	35.6196	8.89502
SPAC27D7.02c	GRIP domain protein |Schizosaccharomyces pombe|chr 1|||Manual	4.89176	2.53	1	2	2	2	750	87.2123	5.30029
SPCC1235.01	SPCC320.02c sequence orphan|Schizosaccharomyces pombe|chr 3|||Manual	6.24036	4.56	1	2	2	2	658	69.6505	4.13232
SPBC16G5.11c	bag101 bag1-a, bag1|BAG family molecular chaperone regulator Bag101 |Schizosaccharomyces pombe|chr 2|||Manual	5.76205	12.31	1	2	2	2	195	22.1918	9.18799
SPAC19B12.04	rps3001 rps30-1|40S ribosomal protein S30 |Schizosaccharomyces pombe|chr 1|||Manual	5.38503	29.51	1	2	2	2	61	6.90584	11.6782
SPAC3G9.12	peg1 cls1|CLASP family microtubule-associated protein|Schizosaccharomyces pombe|chr 1|||Manual	4.78736	1.44	1	1	1	2	1462	163.992	6.56592
SPAC32A11.02c	conserved fungal protein|Schizosaccharomyces pombe|chr 1|||Manual	6.72515	3.76	1	2	2	2	851	97.0192	9.02686
SPAC1D4.04	cct2 chaperonin-containing T-complex beta subunit Cct2|Schizosaccharomyces pombe|chr 1|||Manual	7.44282	6.45	1	2	2	2	527	56.6415	5.69385
SPCC24B10.04	sequence orphan|Schizosaccharomyces pombe|chr 3|||Manual	5.05451	10.05	1	2	2	2	199	23.3512	9.86182
SPAC4A8.04	isp6 prb1|vacuolar serine protease Isp6|Schizosaccharomyces pombe|chr 1|||Manual	10.2179	10.49	1	2	2	2	467	49.336	5.49072
SPBC776.07	mitochondrial Mam33 family protein |Schizosaccharomyces pombe|chr 2|||Manual	5.02101	7.06	1	1	1	2	269	30.5973	4.76709
SPBC405.06	DNAJ protein Xdj1 |Schizosaccharomyces pombe|chr 2|||Manual	5.47984	6.3	1	2	2	2	413	46.0971	6.22705
SPCC736.15	pil1 eisosome protein Pil1|Schizosaccharomyces pombe|chr 3|||Manual	5.37701	5.13	1	2	2	2	351	39.7807	5.41455
SPAC25G10.06	rps2801 rps28-1|40S ribosomal protein S28 |Schizosaccharomyces pombe|chr 1|||Manual	8.69595	23.53	1	2	2	2	68	7.65924	10.4624
SPBC1105.02c	lys4 homocitrate synthase |Schizosaccharomyces pombe|chr 2|||Manual	5.561	4.55	1	2	2	2	418	46.2634	6.06201
SPBP4H10.04	ppb1 calcium-dependent serine/threonine protein phosphatase calcineurin A, catalytic subunit Ppb1|Schizosaccharomyces pombe|chr 2|||Manual	5.59818	3.25	1	2	2	2	554	63.6737	5.97314
SPBC146.03c	cut3 smc4|condensin complex subunit Cut3|Schizosaccharomyces pombe|chr 2|||Manual	6.21748	1.74	1	2	2	2	1324	150.56	6.53662
SPCC1620.04c	mug55 Cdc20/Fizzy subfamily WD repeat protein|Schizosaccharomyces pombe|chr 3|||Manual	6.72184	3.34	1	1	1	2	509	58.3725	8.45557
SPBC16C6.07c	rpt1 19S proteasome regulatory subunit Rpt1 |Schizosaccharomyces pombe|chr 2|||Manual	6.56039	7.08	1	2	2	2	438	48.9341	5.36377
SPAC26F1.06	gpm1 monomeric 2,3-bisphosphoglycerate |Schizosaccharomyces pombe|chr 1|||Manual	6.32863	12.32	1	2	2	2	211	23.7505	7.47412
SPAC30D11.12	rpl3802 rpl38-2, rps38|60S ribosomal protein L38 |Schizosaccharomyces pombe|chr 1|||Manual	6.60235	29.73	1	2	2	2	74	8.33371	10.4917
SPAC4F8.12c	spp42 cwf6|U5 snRNP complex subunit Spp42|Schizosaccharomyces pombe|chr 1|||Manual	5.16568	1.06	1	2	2	2	2363	274.382	8.89502
SPAC23C11.11	cka1 orb5|serine/threonine protein kinase Cka1|Schizosaccharomyces pombe|chr 1|||Manual	7.02212	8.43	1	2	2	2	332	39.5022	7.86963
SPAC694.04c	conserved eukaryotic protein|Schizosaccharomyces pombe|chr 1|||Manual	4.96953	5.86	1	2	2	2	324	36.6495	6.13818
SPBC106.06	cct4 chaperonin-containing T-complex delta subunit Cct4|Schizosaccharomyces pombe|chr 2|||Manual	6.73258	4.55	1	2	2	2	527	56.9326	7.63525
SPCC1020.06c	tal1 transaldolase |Schizosaccharomyces pombe|chr 3|||Manual	6.68567	9.32	1	2	2	2	322	35.2165	5.85889
SPBC1289.07c	rpc40 rpa42|DNA-directed RNA polymerase I and III subunit Rpc40|Schizosaccharomyces pombe|chr 2|||Manual	5.04867	6.32	1	2	2	2	348	39.1302	5.63037
SPAC23D3.02	rfc2 DNA replication factor C complex subunit Rfc2|Schizosaccharomyces pombe|chr 1|||Manual	7.32674	8.53	1	2	2	2	340	37.8527	8.17725
SPBC20F10.01	gar1 SPBC25H2.01c|snoRNP pseudouridylase box H/ACA snoRNP complex protein Gar1|Schizosaccharomyces pombe|chr 2|||Manual	11.7378	20.62	1	2	2	2	194	20.1182	11.0923
SPAC29B12.01	ino80 SPAC3G6.12|SNF2 family helicase Ino80|Schizosaccharomyces pombe|chr 1|||Manual	5.62718	1.62	1	2	2	2	1604	182.935	8.25049
SPCC825.01	ribosome biogenesis ATPase, Arb family ABCF1-like |Schizosaccharomyces pombe|chr 3|||Manual	5.59718	2.55	1	2	2	2	822	92.6327	6.41748
SPAC10F6.09c	psm3 smc3|mitotic cohesin complex subunit Psm3|Schizosaccharomyces pombe|chr 1|||Manual	5.77248	2.01	1	2	2	2	1194	136.766	5.74463
SPAC1687.11	spb1 rRNA methyltransferase Spb1 |Schizosaccharomyces pombe|chr 1|||Manual	7.99564	3.99	1	2	2	2	802	90.8494	6.49365
SPAC3F10.03	grs1 mitochondrial and cytoplasmic glycine-tRNA ligase Grs1 |Schizosaccharomyces pombe|chr 1|||Manual	6.06228	3.37	1	2	2	2	652	73.9585	5.92236
SPBC83.14c	rfc5 DNA replication factor C complex subunit Rfc5 |Schizosaccharomyces pombe|chr 2|||Manual	8.87532	10.61	1	2	2	2	358	40.3776	9.26123
SPAC16E8.06c	nop12 RNA-binding protein Nop12 |Schizosaccharomyces pombe|chr 1|||Manual	6.12146	6.16	1	2	2	2	438	49.3507	9.36377
SPAC11G7.03	idh1 glu3|isocitrate dehydrogenase |Schizosaccharomyces pombe|chr 1|||Manual	6.64634	8.99	1	2	2	2	356	38.7341	7.89893
SPAC4F8.06	mitochondrial ribosomal protein subunit S12 |Schizosaccharomyces pombe|chr 1|||Manual	6.008	14.81	1	2	2	2	162	17.8557	11.312
SPBC215.06c	human LYHRT homolog|Schizosaccharomyces pombe|chr 2|||Manual	6.7644	15	1	2	2	2	180	20.5194	9.0708
SPBC2G2.08	ade9 C-1-tetrahydrofolatesynthase/methylenetetrahydrofolatedehydrogenase/methylenetetrahydrofolatecyclohydrolase/ formyltetrahydrofolatesynthetase |Schizosaccharomyces pombe|chr 2|||Manual	5.48166	2.26	1	2	2	2	972	105.69	8.47021
SPBC14C8.19	tam10 sequence orphan|Schizosaccharomyces pombe|chr 2|||Manual	7.41538	14.29	1	2	2	2	168	19.099	9.979
SPBC14F5.04c	pgk1 phosphoglycerate kinase Pgk1 |Schizosaccharomyces pombe|chr 2|||Manual	3.17598	2.66	1	1	1	1	414	43.9361	8.14795
SPAC18B11.10	tup11 transcriptional corepressor Tup11|Schizosaccharomyces pombe|chr 1|||Manual	3.34986	3.75	1	1	1	1	614	67.2894	6.22705
SPAC18G6.06	U3 snoRNP-associated protein Utp11 |Schizosaccharomyces pombe|chr 1|||Manual	4.26209	6.83	1	1	1	1	249	29.6648	10.1841
SPAC19G12.06c	hta2 histone H2A beta|Schizosaccharomyces pombe|chr 1|||Manual	2.43693	5.34	3	1	1	1	131	13.7676	10.521
SPAC2E1P3.04	cao1 spao1|copper amine oxidase Cao1|Schizosaccharomyces pombe|chr 1|||Manual	2.68185	1.54	1	1	1	1	712	81.1892	6.56592
SPAC1F3.01	rrp6 SPAC3H8.11|exosome 3'-5' exoribonuclease subunit Rrp6 |Schizosaccharomyces pombe|chr 1|||Manual	2.82096	1.29	1	1	1	1	777	89.5043	7.60596
SPCC970.10c	brl2 rfp1|ubiquitin-protein ligase E3 Brl2|Schizosaccharomyces pombe|chr 3|||Manual	2.71159	1.62	1	1	1	1	680	78.0042	6.30322
SPCC5E4.05c	mitochondrial serine hydrolase |Schizosaccharomyces pombe|chr 3|||Manual	3.15001	2.65	1	1	1	1	378	41.5978	5.96045
SPBC2G5.01	DUF1682 family protein|Schizosaccharomyces pombe|chr 2|||Manual	3.39358	2.67	1	1	1	1	374	43.0703	9.0415
SPCC320.10	srp72 signal recognition particle subunit Srp72 |Schizosaccharomyces pombe|chr 3|||Manual	3.85666	2.5	1	1	1	1	561	63.2419	7.69385
SPBC2G5.05	transketolase Schizosaccharomyces pombe|chr 2|||Manual	2.53774	1.61	1	1	1	1	685	75.1347	6.80029
SPAC637.07	moe1 translation initiation factor eIF3d Moe1|Schizosaccharomyces pombe|chr 1|||Manual	2.73611	1.76	1	1	1	1	567	62.5983	7.06396
SPBC4C3.05c	nuc1 rpa1|DNA-directed RNA polymerase I complex large subunit Nuc1|Schizosaccharomyces pombe|chr 2|||Manual	4.28399	0.95	1	1	1	1	1689	189.127	6.63916
SPCC576.03c	tpx1 thioredoxin peroxidase Tpx1|Schizosaccharomyces pombe|chr 3|||Manual	2.82507	5.73	1	1	1	1	192	21.1779	5.59229
SPAC959.03c	U3 snoRNP-associated protein Utp7 |Schizosaccharomyces pombe|chr 1|||Manual	3.19834	1.92	1	1	1	1	520	59.7211	9.53955
SPAC17A5.15c	glutamate-tRNA ligase |Schizosaccharomyces pombe|chr 1|||Manual	2.36766	1.54	1	1	1	1	716	80.6991	6.78564
SPAC15A10.02	taf12 transcription factor TFIID complex subunit A/ SAGA complex subunit|Schizosaccharomyces pombe|chr 1|||Manual	2.77915	2.44	1	1	1	1	450	49.166	9.17334
SPBC1773.10c	nrs1 ded81|cytoplasmic asparagine-tRNA ligase Nrs1 |Schizosaccharomyces pombe|chr 2|||Manual	3.95463	2.11	1	1	1	1	568	63.8295	6.06201
SPBC800.08	gcd10 tRNA |Schizosaccharomyces pombe|chr 2|||Manual	2.8982	2.6	1	1	1	1	462	53.1673	7.09326
SPCC18B5.04	rsm18 mitochondrial ribosomal protein subunit S18 |Schizosaccharomyces pombe|chr 3|||Manual	3.77541	7.23	1	1	1	1	166	19.0188	10.3013
SPAC12G12.04	mcp60 hsp60|mitochondrial heat shock protein Hsp60/Mcp60|Schizosaccharomyces pombe|chr 1|||Manual	2.7779	2.41	1	1	1	1	582	62.1288	5.98584
SPBP23A10.07	rpa2 DNA-directed RNA polymerase I complex subunit Rpa2|Schizosaccharomyces pombe|chr 2|||Manual	2.77454	1.02	1	1	1	1	1174	131.603	8.45557
SPAC17H9.04c	RNA-binding protein|Schizosaccharomyces pombe|chr 1|||Manual	3.08016	1.66	1	1	1	1	604	66.3541	7.34229
SPCC794.07	lat1 dihydrolipoamide S-acetyltransferase E2, Lat1 |Schizosaccharomyces pombe|chr 3|||Manual	3.23348	2.69	1	1	1	1	483	52.0279	8.1333
SPBC1A4.03c	top2 ptr11|DNA topoisomerase II|Schizosaccharomyces pombe|chr 2|||Manual	2.99102	0.74	1	1	1	1	1485	167.788	7.28369
SPAC890.04c	ribosome biogenesis protein Ytm1 |Schizosaccharomyces pombe|chr 1|||Manual	3.81877	4.32	1	1	1	1	440	48.3044	6.12549
SPAC144.01	sequence orphan|Schizosaccharomyces pombe|chr 1|||Manual	2.26998	7.14	1	1	1	1	112	13.6104	10.0229
SPAC6G9.02c	nop9 RNA-binding protein Nop9 |Schizosaccharomyces pombe|chr 1|||Manual	3.92646	2.44	1	1	1	1	655	75.3927	7.26904
SPAC1D4.14	tho2 SPAC22F3.14c|THO complex subunit Tho2 |Schizosaccharomyces pombe|chr 1|||Manual	2.41001	0.61	1	1	1	1	1628	188.715	8.06006
SPAC31G5.10	eta2 Myb family protein Eta2|Schizosaccharomyces pombe|chr 1|||Manual	2.71279	1.76	1	1	1	1	569	65.241	8.85107
SPAC18G6.11c	rrn3 ribosomal DNA |Schizosaccharomyces pombe|chr 1|||Manual	2.35877	3.34	1	1	1	1	599	68.5108	4.83057
SPAC2G11.11c	prh1 ATP-dependent RNA helicase Prh1 |Schizosaccharomyces pombe|chr 1|||Manual	2.3151	1.53	1	1	1	1	719	80.555	8.63135
SPAPYUK71.03c	syn1 synaptotagmin family C2 domain protein, Syn1|Schizosaccharomyces pombe|chr 1|||Manual	2.50678	1.14	1	1	1	1	1225	135.695	7.18115
SPAC2E1P5.03	DNAJ domain protein Erj5 |Schizosaccharomyces pombe|chr 1|||Manual	2.85884	3.96	1	1	1	1	303	34.7656	10.0083
SPBC428.16c	rhb1 Rheb GTPase Rhb1|Schizosaccharomyces pombe|chr 2|||Manual	2.45108	5.95	1	1	1	1	185	20.5025	7.53271
SPBC16G5.04	mrpl23 mitochondrial ribosomal protein subunit L13 |Schizosaccharomyces pombe|chr 2|||Manual	3.33649	7.64	1	1	1	1	157	17.7571	9.75928
SPBC1539.10	nop16 ribosome biogenesis protein Nop16 |Schizosaccharomyces pombe|chr 2|||Manual	2.94979	6.22	1	1	1	1	209	23.9317	9.71533
SPAC4F10.09c	ribosome biogenesis protein Noc1 |Schizosaccharomyces pombe|chr 1|||Manual	3.15088	1.28	1	1	1	1	860	97.9315	5.43994
SPCC1259.11c	gyp2 GTPase activating protein Gyp2 |Schizosaccharomyces pombe|chr 3|||Manual	4.71498	3.06	1	1	1	1	720	82.6966	5.52881
SPAC694.02	DEAD/DEAH box helicase|Schizosaccharomyces pombe|chr 1|||Manual	2.79994	0.76	1	1	1	1	1717	194.935	6.16357
SPBC3F6.02c	3 beta-hydroxysteroid dehydrogenase/delta 5-->4-isomerase |Schizosaccharomyces pombe|chr 2|||Manual	2.93948	3.24	1	1	1	1	340	38.2935	6.27783
SPCC1682.04	cdc31 centrin|Schizosaccharomyces pombe|chr 3|||Manual	2.43167	4.55	1	1	1	1	176	20.4572	4.70361
SPBC16A3.15c	nda2 tubulin alpha 1|Schizosaccharomyces pombe|chr 2|||Manual	3.28447	4.4	1	1	1	1	455	51.1196	5.08447
SPCC1739.12	ppe1 esp1, ppx1|serine/threonine protein phosphatase Ppe1|Schizosaccharomyces pombe|chr 3|||Manual	3.09296	5.25	1	1	1	1	305	35.2365	5.5542
SPAC222.06	mak16 nuclear HMG-like acidic protein Mak16 |Schizosaccharomyces pombe|chr 1|||Manual	3.23298	5.96	1	1	1	1	302	35.6049	5.57959
SPBC32H8.05	conserved fungal protein|Schizosaccharomyces pombe|chr 2|||Manual	3.10734	9.4	1	1	1	1	117	13.2881	10.4478
SPCC126.05c	mrpl17 mitochondrial ribosomal protein subunit L17 |Schizosaccharomyces pombe|chr 3|||Manual	3.61713	5.22	1	1	1	1	268	31.0092	9.29053
SPBC11B10.09	cdc2 swo2, cdk1, tws1|cyclin-dependent protein kinase Cdk1/Cdc2|Schizosaccharomyces pombe|chr 2|||Manual	2.32626	4.04	1	1	1	1	297	34.3369	7.57666
SPBC3H7.04	mitochondrial ribosomal protein subunit S26 |Schizosaccharomyces pombe|chr 2|||Manual	4.27119	6.82	1	1	1	1	220	25.0575	8.23584
SPBC902.02c	ctf18 chl12|RFC-like complex subunit Ctf18|Schizosaccharomyces pombe|chr 2|||Manual	2.62627	1.46	1	1	1	1	960	108.583	6.97607
SPAC328.03	tps1 alpha,alpha-trehalose-phosphate synthase [UDP-forming]|Schizosaccharomyces pombe|chr 1|||Manual	2.66197	3.12	1	1	1	1	513	58.4566	6.16357
SPAPB1E7.11c	sequence orphan|Schizosaccharomyces pombe|chr 1|||Manual	2.80829	3.45	1	1	1	1	319	36.6793	9.5249
SPBC36.05c	clr6 histone deacetylase |Schizosaccharomyces pombe|chr 2|||Manual	3.17375	2.96	1	1	1	1	405	46.0823	5.71924
SPCC645.08c	snd1 RNA-binding protein Snd1|Schizosaccharomyces pombe|chr 3|||Manual	2.28627	1.94	1	1	1	1	878	98.1001	7.44482
SPBC12D12.04c	pck2 sts6, pkc1|protein kinase C |Schizosaccharomyces pombe|chr 2|||Manual	3.037	1.28	1	1	1	1	1016	115.932	8.07471
SPBC4.07c	rpt2 mts2|19S proteasome regulatory subunit Rpt2|Schizosaccharomyces pombe|chr 2|||Manual	3.63576	2.68	1	1	1	1	448	50.0288	5.74463
SPBC13G1.01c	nam9 mitochondrial ribosomal protein subunit S4 |Schizosaccharomyces pombe|chr 2|||Manual	2.52758	2.45	1	1	1	1	327	37.6416	10.0083
SPCC24B10.11c	mft1 THO complex subunit 7 Mft1 |Schizosaccharomyces pombe|chr 3|||Manual	2.69715	5.45	1	1	1	1	202	23.2676	4.81787
SPAC1805.08	dlc1 dynein light chain Dlc1|Schizosaccharomyces pombe|chr 1|||Manual	3.18518	9.01	1	1	1	1	111	12.246	5.021
SPBP22H7.04	sequence orphan|Schizosaccharomyces pombe|chr 2|||Manual	2.63957	6.27	1	1	1	1	255	29.4879	10.0962
SPBC577.13	syj2 inositol-polyphosphate 5-phosphatase, synaptojanin homolog 2 |Schizosaccharomyces pombe|chr 2|||Manual	3.13244	1.57	1	1	1	1	889	101.643	6.80029
SPBC577.02	rpl3801 rpl38-1|60S ribosomal protein L38 |Schizosaccharomyces pombe|chr 2|||Manual	3.32294	18.92	1	1	1	1	74	8.48676	10.1694
SPBC577.04	human THOC5 ortholog |Schizosaccharomyces pombe|chr 2|||Manual	3.60697	8.5	1	1	1	1	200	23.4825	8.83643
SPAC21E11.06	tif224 translation initiation factor eIF2B delta subunit |Schizosaccharomyces pombe|chr 1|||Manual	3.4508	3.43	1	1	1	1	467	51.5511	8.73389
SPCC622.09	htb1 histone H2B Htb1|Schizosaccharomyces pombe|chr 3|||Manual	3.13056	11.11	1	1	1	1	126	13.8103	10.0669
SPBC18H10.07	WW domain-binding protein 4 |Schizosaccharomyces pombe|chr 2|||Manual	4.89483	9.38	1	1	1	1	224	25.8714	9.37842
SPBC1604.12	sequence orphan|Schizosaccharomyces pombe|chr 2|||Manual	2.81272	1.16	1	1	1	1	860	93.23	8.93896
SPAC31A2.08	mrp20 mitochondrial ribosomal protein subunit L23 |Schizosaccharomyces pombe|chr 1|||Manual	3.43015	8.07	1	1	1	1	161	18.9653	9.86182
SPCC584.04	sup35 erf3|translation release factor class II eRF3|Schizosaccharomyces pombe|chr 3|||Manual	2.30609	1.51	1	1	1	1	662	72.511	8.42627
SPAC1556.05c	cgr1 ribosome biogenesis CGR1 family |Schizosaccharomyces pombe|chr 1|||Manual	2.67267	7.21	1	1	1	1	111	13.5044	10.5503
SPBP18G5.03	toc1 Tor complex Tor2 interacting protein 1|Schizosaccharomyces pombe|chr 2|||Manual	3.49533	2.33	1	1	1	1	430	48.7612	5.19873
SPBC13E7.07	sequence orphan|Schizosaccharomyces pombe|chr 2|||Manual	2.28307	2.93	1	1	1	1	273	31.0393	10.0083
SPAC4H3.14c	sequence orphan|Schizosaccharomyces pombe|chr 1|||Manual	4.07141	6.09	1	1	1	1	345	39.7755	4.70361
SPBC887.03c	noc3 Noc2p-Noc3p complex subunit Noc3 |Schizosaccharomyces pombe|chr 2|||Manual	2.64359	1.47	1	1	1	1	747	85.0479	8.39697
SPAC3A12.19	mitochondrial ribosomal protein subunit L27 |Schizosaccharomyces pombe|chr 1|||Manual	2.46779	7.53	1	1	1	1	93	10.3803	10.0962
SPAC3A12.18	zwf1 SPAC9.01|glucose-6-phosphate 1-dehydrogenase |Schizosaccharomyces pombe|chr 1|||Manual	3.06279	3.8	1	1	1	1	500	57.1682	6.17627
SPAP19A11.05c	mrp7 SPBP19A11.05c|mitochondrial ribosomal protein subunit L27 |Schizosaccharomyces pombe|chr 2|||Manual	2.29427	5.88	1	1	1	1	153	17.1492	10.77
SPCC63.14	conserved fungal protein|Schizosaccharomyces pombe|chr 3|||Manual	3.29562	1.01	1	1	1	1	1184	130.979	6.59521
SPBC146.14c	sec26 SPBC337.01c|coatomer beta subunit |Schizosaccharomyces pombe|chr 2|||Manual	2.27059	1.81	1	1	1	1	940	104.634	5.64307
SPBC31A8.01c	rtn1 cwl1, SPBC651.13c|reticulon-like protein Rtn1|Schizosaccharomyces pombe|chr 2|||Manual	2.62298	3.9	1	1	1	1	308	33.6381	7.47412
SPBC106.13	ubiquitin ligase complex subunit, involved in proteasome-dependent catabolite inactivation of FBPase |Schizosaccharomyces pombe|chr 2|||Manual	2.46713	2.72	1	1	1	1	404	45.8287	7.53271
SPAC2G11.14	taf111 taf1, taf130, kat4|transcription factor TFIID complex subunit Taf111|Schizosaccharomyces pombe|chr 1|||Manual	2.39471	1.23	1	1	1	1	979	110.945	6.80029
SPBC28F2.11	HMG box protein|Schizosaccharomyces pombe|chr 2|||Manual	2.29462	3.55	1	1	1	1	310	33.8703	9.31982
SPAC2G11.02	urb2 ribosome biogenesis protein Urb2 |Schizosaccharomyces pombe|chr 1|||Manual	2.59874	0.68	1	1	1	1	1318	151.472	7.2251
SPAC8C9.07	rRNA processing protein Fyv7 |Schizosaccharomyces pombe|chr 1|||Manual	2.41907	6.94	1	1	1	1	144	17.2104	10.4185
SPAC607.03c	snu13 U3 snoRNP-associated protein Snu13|Schizosaccharomyces pombe|chr 1|||Manual	2.35629	8	1	1	1	1	125	13.5263	7.28369
SPCC1393.11	mitochondrial ribosomal protein subunit L20 |Schizosaccharomyces pombe|chr 3|||Manual	2.2941	4.57	1	1	1	1	197	22.6842	10.6089
SPAC607.02c	conserved fungal protein|Schizosaccharomyces pombe|chr 1|||Manual	2.86385	4.76	1	1	1	1	231	27.3387	9.87646
SPBC646.11	cct6 chaperonin-containing T-complex zeta subunit Cct6|Schizosaccharomyces pombe|chr 2|||Manual	3.29878	2.24	1	1	1	1	535	58.5116	6.25244
SPAC3C7.08c	elf1 AAA family ATPase Elf1|Schizosaccharomyces pombe|chr 1|||Manual	2.8271	0.85	1	1	1	1	1057	116.627	6.52197
SPAC29A4.08c	prp19 cwf8|ubiquitin-protein ligase E4|Schizosaccharomyces pombe|chr 1|||Manual	4.19323	3.07	1	1	1	1	488	54.1577	5.10986
SPAC7D4.07c	trx1 cytosolic thioredoxin Trx1|Schizosaccharomyces pombe|chr 1|||Manual	3.1497	10.68	1	1	1	1	103	11.2897	4.97021
SPBC16C6.13c	sec27 coatomer beta' subunit |Schizosaccharomyces pombe|chr 2|||Manual	2.85504	2.01	1	1	1	1	796	89.7465	5.14795
SPCC895.09c	ucp12 ATP-dependent RNA helicase Ucp12 |Schizosaccharomyces pombe|chr 3|||Manual	2.2718	1.13	1	1	1	1	1327	149.787	8.63135
SPCC1620.08	succinate-CoA ligase beta subunit |Schizosaccharomyces pombe|chr 3|||Manual	3.75021	3	1	1	1	1	433	47.2575	6.87354
SPCC285.03	ATP-dependent RNA helicase Dbp6 |Schizosaccharomyces pombe|chr 3|||Manual	2.50769	1.99	1	1	1	1	604	68.3025	7.76709
SPBC776.08c	Nrap Schizosaccharomyces pombe|chr 2|||Manual	2.50143	0.91	1	1	1	1	1097	126.002	7.54736
SPAC22F3.08c	rok1 ATP-dependent RNA helicase Rok1 |Schizosaccharomyces pombe|chr 1|||Manual	2.9836	2.29	1	1	1	1	481	53.992	9.48096
SPBC2G2.02	syj1 inositol-polyphosphate 5-phosphatase |Schizosaccharomyces pombe|chr 2|||Manual	2.64141	1.02	1	1	1	1	1076	121.746	7.92822
SPBC14C8.14c	pol5 DNA polymerase phi|Schizosaccharomyces pombe|chr 2|||Manual	4.51671	1.77	1	1	1	1	959	109.651	5.74463
SPAC12G12.07c	conserved fungal protein|Schizosaccharomyces pombe|chr 1|||Manual	5.32541	5.83	1	1	1	1	412	45.6967	5.21143
SPBP19A11.03c	mts4 rpn1|19S proteasome regulatory subunit Mts4|Schizosaccharomyces pombe|chr 2|||Manual	3.89899	1.91	1	1	1	1	891	97.9368	5.021
SPCC1739.02c	mrpl22 mitochondrial ribosomal protein subunit L22 |Schizosaccharomyces pombe|chr 3|||Manual	3.18142	4.82	1	1	1	1	249	28.8854	10.3599
SPAC2C4.03c	smd2 cwf9|Sm snRNP core protein Smd2|Schizosaccharomyces pombe|chr 1|||Manual	3.29078	8.7	1	1	1	1	115	13.087	9.74463
SPAC3G6.04	rnp24 RNA-binding protein Rnp24|Schizosaccharomyces pombe|chr 1|||Manual	2.69834	2.44	1	1	1	1	369	42.0476	9.36377
SPBC31F10.06c	sar1 ADP-ribosylation factor Sar1|Schizosaccharomyces pombe|chr 2|||Manual	3.60817	7.37	1	1	1	1	190	21.266	6.18896
SPAC29A4.11	rga3 Rho-type GTPase activating protein Rga3|Schizosaccharomyces pombe|chr 1|||Manual	2.49598	1.14	1	1	1	1	969	108.58	7.69385
SPAC23C4.19	spt5 transcription elongation factor Spt5|Schizosaccharomyces pombe|chr 1|||Manual	2.4099	1.82	1	1	1	1	990	108.948	5.08447
SPCC970.03	cytochrome b5 reductase |Schizosaccharomyces pombe|chr 3|||Manual	2.58704	3.65	1	1	1	1	301	33.702	9.49561
SPBC16A3.14	mitochondrial ribosomal protein subunit S26 |Schizosaccharomyces pombe|chr 2|||Manual	4.34495	7.46	1	1	1	1	268	30.9537	8.30908
SPBP4H10.18c	sequence orphan|Schizosaccharomyces pombe|chr 2|||Manual	2.61868	3.82	1	1	1	1	314	35.8578	10.3306
SPCC18.12c	utp23 rRNA processing protein Utp23 |Schizosaccharomyces pombe|chr 3|||Manual	3.41535	5.38	1	1	1	1	260	29.6198	9.94971
SPCC1322.04	fyu1 UTP-glucose-1-phosphate uridylyltransferase Fyu1|Schizosaccharomyces pombe|chr 3|||Manual	2.7923	2.37	1	1	1	1	506	56.3944	7.51807
SPBC1703.13c	mitochondrial inorganic phosphate transporter |Schizosaccharomyces pombe|chr 2|||Manual	3.0469	4.18	1	1	1	1	311	33.8215	9.49561
SPBC8D2.18c	adenosylhomocysteinase Schizosaccharomyces pombe|chr 2|||Manual	3.30696	2.77	1	1	1	1	433	47.3532	5.93506
SPBC12C2.11	SPBC21D10.02 glutamine-fructose-6-phosphate transaminase |Schizosaccharomyces pombe|chr 2|||Manual	3.66038	2.16	1	1	1	1	696	77.2728	6.63916
SPAC16E8.15	tif45 tif1|translation initiation factor eIF4E, 4F complex subunit|Schizosaccharomyces pombe|chr 1|||Manual	3.64646	6.42	1	1	1	1	218	24.9425	6.94678
SPAC227.07c	pab1 protein phosphatase regulatory subunit Pab1|Schizosaccharomyces pombe|chr 1|||Manual	3.13556	2.38	1	1	1	1	463	52.7621	5.70654
SPBC27.03	meu25 sequence orphan Meu25|Schizosaccharomyces pombe|chr 2|||Manual	2.4905	1.77	1	1	1	1	622	71.4186	4.93213
SPCC1919.09	tif6 translation initiation factor eIF6|Schizosaccharomyces pombe|chr 3|||Manual	4.39075	5.33	1	1	1	1	244	26.2163	4.60205
SPAC14C4.14	atp1 F1-ATPase alpha subunit|Schizosaccharomyces pombe|chr 1|||Manual	4.56099	2.05	1	1	1	1	536	58.551	9.08545
SPBC1711.18	tam9 mitochondrial ribosomal protein subunit L36, MrpL36/YmL36 |Schizosaccharomyces pombe|chr 2|||Manual	2.78737	12.79	1	1	1	1	86	9.79624	10.272
SPBC9B6.06	mrpl10 mitochondrial ribosomal protein subunit L15 |Schizosaccharomyces pombe|chr 2|||Manual	3.08154	3.94	1	1	1	1	254	28.145	10.5942
SPAC18G6.04c	shm2 serine hydroxymethyltransferase Shm2 |Schizosaccharomyces pombe|chr 1|||Manual	2.61319	2.46	1	1	1	1	488	53.9449	9.17334
SPCC23B6.01c	oxysterol binding protein |Schizosaccharomyces pombe|chr 3|||Manual	2.2949	2.3	1	1	1	1	479	54.6137	6.44287
SPAC664.02c	arp8 actin-like protein, Ino80 complex subunit Arp8|Schizosaccharomyces pombe|chr 1|||Manual	2.58209	2.11	1	1	1	1	662	75.146	5.31299
SPBC29A10.04	psm1 smc1|mitotic cohesin complex subunit Psm1|Schizosaccharomyces pombe|chr 2|||Manual	2.30286	0.9	1	1	1	1	1228	140.436	5.88428
SPBC337.12	human ZC3H3 homolog|Schizosaccharomyces pombe|chr 2|||Manual	3.54311	4.79	1	1	1	1	376	42.2979	8.6167
SPBC887.07	mrpl38 mitochondrial ribosomal protein subunit L38 |Schizosaccharomyces pombe|chr 2|||Manual	3.03896	7.35	1	1	1	1	136	14.7331	10.0669
SPCC1919.14c	bdp1 transcription factor TFIIIB complex subunit Bdp1 |Schizosaccharomyces pombe|chr 3|||Manual	2.91485	2.69	1	1	1	1	520	59.047	5.65576
